# Supplementary material for: The CoDiNOS trial protocol: an international randomised controlled trial of intravenous sildenafil versus inhaled nitric oxide for the treatment of pulmonary hypertension in neonates with congenital diaphragmatic hernia
Source: PubMed Central journal article supplement (PMC6858099; doi:10.1136/bmjopen-2019-032122), 2019-11-05
Supplement: bmjopen-2019-032122.draft_revisions.pdf [file bmjopen-2019-032122.draft_revisions.pdf]

# BMJ Open

BMJ Open is committed to open peer review. As part of this commitment we make the peer review history of every article we publish publicly available.

When an article is published we post the peer reviewers' comments and the authors' responses online. We also post the versions of the paper that were used during peer review. These are the versions that the peer review comments apply to.

The versions of the paper that follow are the versions that were submitted during the peer review process. They are not the versions of record or the final published versions. They should not be cited or distributed as the published version of this manuscript.

BMJ Open is an open access journal and the full, final, typeset and author-corrected version of record of the manuscript is available on our site with no access controls, subscription charges or pay-per-view fees (<http://bmjopen.bmj.com>).

If you have any questions on BMJ Open's open peer review process please email [info.bmjopen@bmj.com](mailto:info.bmjopen@bmj.com)

# BMJ Open

**The CoDiNOS trial protocol: An international randomized controlled trial of intravenous sildenafil versus inhaled nitric oxide for the treatment of pulmonary hypertension in neonates with congenital diaphragmatic hernia.**

|                               |                                                                                                                                                                                                                                                                                                                                                                                                                                                                                                                                                                                                                                                                                               |
|-------------------------------|-----------------------------------------------------------------------------------------------------------------------------------------------------------------------------------------------------------------------------------------------------------------------------------------------------------------------------------------------------------------------------------------------------------------------------------------------------------------------------------------------------------------------------------------------------------------------------------------------------------------------------------------------------------------------------------------------|
| Journal:                      | <i>BMJ Open</i>                                                                                                                                                                                                                                                                                                                                                                                                                                                                                                                                                                                                                                                                               |
| Manuscript ID                 | bmjopen-2019-032122                                                                                                                                                                                                                                                                                                                                                                                                                                                                                                                                                                                                                                                                           |
| Article Type:                 | Protocol                                                                                                                                                                                                                                                                                                                                                                                                                                                                                                                                                                                                                                                                                      |
| Date Submitted by the Author: | 05-Jun-2019                                                                                                                                                                                                                                                                                                                                                                                                                                                                                                                                                                                                                                                                                   |
| Complete List of Authors:     | Cochius - den Otter, Suzan; Erasmus University Rotterdam, Pediatric Intensive Care<br>Schaible, Thomas; University Medical Center, Mannheim<br>Greenough, Anne; Kings College London, Department of Women and Children's Health, School of Life Sciences, Faculty of Life Science and Medicine<br>van Heijst, Arno; Radboudumc, Division of Neonatology, Department of Pediatrics<br>Patel, Neil; Royal Hospital for Children Glasgow, Departement of Neonatology<br>Allegaert, Karel; Erasmus MC Sophia, Pediatrics, Division of Neonatology<br>van Rosmalen, Joost; Erasmus MC, Biostatistics<br>Tibboel, Dick; Erasmus MC-Sophia Children's Hospital, Intensive Care and Pediatric Surgery |
| Keywords:                     | congenital diaphragmatic hernia, sildenafil, nitric oxide, THERAPEUTICS, pulmonary hypertension                                                                                                                                                                                                                                                                                                                                                                                                                                                                                                                                                                                               |
|                               |                                                                                                                                                                                                                                                                                                                                                                                                                                                                                                                                                                                                                                                                                               |

SCHOLARONE™  
Manuscripts

1  
2  
3 **The CoDiNOS trial protocol: An international randomized controlled trial of intravenous sildenafil**  
4 **versus inhaled nitric oxide for the treatment of pulmonary hypertension in neonates with**  
5 **congenital diaphragmatic hernia.**  
6  
7

8  
9 Suzan CM Cochijs – den Otter MD<sup>1</sup>, Thomas Schaible MD PhD<sup>2</sup>, Anne Greenough MD<sup>3</sup>, Arno van  
10 Heijst MD PhD<sup>4</sup>, Neil Patel MD<sup>5</sup>, Karel Allegaert MD PhD<sup>1,6</sup>, Joost van Rosmalen PhD<sup>7</sup>, Dick Tibboel  
11 MD PhD<sup>1</sup> on behalf of the CDH EURO Consortium  
12  
13  
14  
15  
16

17 <sup>1</sup>Intensive Care and department of Pediatric Surgery, Erasmus MC, Rotterdam, the Netherlands.

18 <sup>2</sup>Department of Neonatology Universitätsmedizin Mannheim, Mannheim, Germany. <sup>3</sup>The Asthma UK  
19 Centre in Allergic Mechanisms of Asthma; Women and Children's Health, School of Life Course  
20 Sciences, Faculty of Life Sciences and Medicine, King's College London, Denmark Hill, London, United  
21 Kingdom. <sup>4</sup> Division of Neonatology, Department of Pediatrics, Radboudumc Amalia Children's  
22 Hospital, Nijmegen, The Netherlands. <sup>5</sup>Departement of Neonatology, Royal Hospital for Children,  
23 Glasgow, United Kingdom. <sup>6</sup>Department of Development and Regeneration, KU, Leuven, Belgium.  
24  
25  
26  
27  
28

29 <sup>7</sup>Department of Biostatistics, Erasmus MC, Rotterdam, The Netherlands.  
30  
31  
32  
33

34 Corresponding author

35  
36 Suzan CM Cochijs – den Otter

37  
38 Erasmus MC-Sophia Children's Hospital

39  
40 Intensive Care Unit

41  
42 Wyttemaweg 80

43  
44 3015 CN Rotterdam

45  
46 Tel.: (+31) 10 7031769

47  
48 Fax: (+31) 10 7037162

49  
50 s.denotter@erasmusmc.nl  
51  
52  
53

54  
55 **Word count:** 3004

56  
57  
58 **Keywords:** Congenital Diaphragmatic Hernia, Pulmonary Hypertension, Therapeutics, Sildenafil,  
59 Nitric Oxide  
60

## Abstract

### Introduction

Congenital diaphragmatic hernia (CDH) is a developmental defect of the diaphragm that impairs normal lung development, causing pulmonary hypertension (PH). PH in CDH newborns is the main determinant for morbidity and mortality. Different therapies are still mainly based on “trial and error”. Inhaled nitric oxide (iNO) is often the drug of first choice. However, iNO does not seem to improve mortality. Intravenous (iv) sildenafil has reduced mortality in newborns with PH without CDH, but prospective data in CDH patients are lacking.

### Methods and analysis

*Methods:* In an open label, multicenter, international randomized controlled trial 330 newborns with CDH and PH will be recruited over a four-year period (2018-2022). Patients are randomized for iv sildenafil or iNO. Sildenafil is given in a loading dose of 0.4 mg/kg in 3 hours; followed by continuous infusion of 1.6 mg/kg/day, iNO is dosed at 20 ppm.

Primary outcome is absence of PH on day 14 without pulmonary vasodilator therapy and/or absence of death within the first 28 days of life. Secondary outcome measures include clinical and echocardiographic markers of PH in the first year of life.

*Data analysis:* We hypothesize that sildenafil gives a 25% reduction in PH from 68% to 48% on day 14, for which a sample size of 330 patients is needed. An intention-to-treat analysis will be performed. A p-value (two-sided) < 0.05 is considered significant in all analyses.

### Ethics and dissemination

Ethics approval has been granted by the ethics committee in Rotterdam (MEC-2017-324) and the central Committee on Research Involving Human Subjects (NL60229.078.17) in the Netherlands. The principles of the Declaration of Helsinki, the Medical Research Involving Human Subjects Act, and the national rules and regulations on personal data protection will be used. Parental informed consent will be obtained.

### Registration

Trial registration number NTR6982 (Trial NL6796).

## Article summary

### Strengths and limitations of this study

- The CoDiNOS trial is the first randomized controlled multicenter trial to evaluate the effect of intravenous sildenafil and compare with iNO on pulmonary hypertension in newborns with CDH.
- This is the second randomized controlled trial of the CDH EURO Consortium in a large group of newborns with this orphan disease.
- Treatment allocation is not blinded in the trial. This is not feasible because of variability in iNO equipment and gas mixtures use. Instead, the researchers who analyze the echocardiography to evaluate PH will be blinded to the treatment.
- There is no non-intervention group, as it is common practice in the centers of the CDH EURO Consortium to give iNO; hence, it is considered unethical to withhold treatment for one group.

## Introduction:

Congenital diaphragmatic hernia (CDH) is a severe developmental defect of the diaphragm with a mortality of 27% in live-born patients [1]. Because of this defect, the abdominal organs herniate into the chest causing pulmonary hypoplasia and abnormal pulmonary vasculature growth, resulting in pulmonary hypertension (PH) [2]. In adults and children, PH is defined as mean pulmonary artery pressure (mPAP) exceeding 25 mmHg with a pulmonary capillary wedge pressure of minimal 15 mmHg [3].

The normal pulmonary vascular transition of the neonate takes around two months to achieve these low values of mPAP. During fetal life, there is high resistance in the pulmonary circulation which results in most of the blood flow to bypass the lungs through the ductus arteriosus and oval foramen. Immediately after birth, the pulmonary vascular resistance drops and the blood flow to the lungs significantly increases [4]. In contrast, the pulmonary vascular resistance often does not drop adequately in children with CDH due to a decreased vascular bed associated with lung hypoplasia, and an altered development of the pulmonary vasculature with excessive muscularization of the arterioles, with increased thickness of the arterial media and adventitia. The incidence of PH in CDH patients is 68-79% and causes considerable morbidity and mortality [1, 2, 5]. Therapy in newborns with PH, such as inhaled nitric oxide (iNO) and sildenafil, has improved outcomes in general. However, trials in infants with CDH are sparse.

Inhaled nitric oxide (iNO) diffuses rapidly across the alveolar-capillary membrane into the smooth muscle of pulmonary vessels to activate soluble guanylate cyclase. This enzyme mediates many of the biological effects of iNO, and is responsible for the conversion of GTP to cGMP. The increase of intracellular cGMP relaxes smooth muscles via several mechanisms. iNO also causes bronchodilation and has anti-inflammatory and anti-proliferative effects [6]. In term and near term infants with persistent pulmonary hypertension of the newborn (PPHN), iNO decreases the median duration of mechanical ventilation and reduces the need for extracorporeal membrane oxygenation (ECMO). However, in the two available randomized controlled trials (RCT) with a small number of patients with CDH, mortality did not improve and more ECMO treatment was needed [7, 8]. In the centers of the CDH EURO Consortium, iNO is standard of care in infants with CDH and PH although the positive pharmacodynamic effects in these infants are less convincing than in infants with PPHN [5, 9]. The pathophysiological mechanism of this difference is not understood.

Sildenafil is a selective phosphodiesterase type 5 (PDE5) inhibitor. PDE5 is an enzyme that specifically degrades cGMP. Sildenafil inhibits PDE5, increasing cGMP and NO-mediated vasodilatation of the smooth muscles in arteries. Only five RCTs have been performed in newborns, all non-CDH patients

1  
2  
3 with PPHN. Four of these studies showed a decrease in oxygenation index (OI) and mortality in a  
4 setting where iNO was not available, while one trial showed no additional benefit of sildenafil when  
5 added to iNO [10]. Although sildenafil is increasingly used in CDH patients, only retrospective data  
6 are available [11]. A decrease in pulmonary vascular resistance index and an increase in cardiac  
7 output were found in a small group of oral sildenafil-treated infants with CDH refractory to iNO [12].  
8 Intravenous sildenafil improved OI and reversed the right-to-left shunt ratio over the PDA, but it also  
9 increased the need for inotropic support [13, 14]. However, its effect on outcome is unknown.

10  
11 We hypothesize that intravenous sildenafil is superior to iNO and should be the first line of treatment  
12 for PH in CDH patients. iNO is the therapy of first choice in most centers despite the lack of evidence,  
13 and sildenafil is the most promising drug for the treatment of PH in CDH patients and is increasingly  
14 being used [5, 11, 15]. However, no studies have been performed comparing iNO with intravenous  
15 sildenafil in newborns with CDH and PH or PH alone. Based on the current knowledge, there is  
16 equipoise for both treatment modalities.  
17  
18  
19  
20  
21  
22  
23  
24  
25  
26  
27  
28  
29  
30  
31  
32  
33  
34  
35  
36  
37  
38  
39  
40  
41  
42  
43  
44  
45  
46  
47  
48  
49  
50  
51  
52  
53  
54  
55  
56  
57  
58  
59  
60

## Methods and analysis:

### Design

The CoDiNOS trial is a prospective, multicenter, international randomized controlled trial conducted in high volume pediatric surgical centers in Europe, Canada and Australia. The members of the CDH Euro Consortium participating in the trial are listed in the Appendix.

### Objectives

The primary objective of the study is to determine whether the incidence of PH is lower in CDH patients treated with intravenous sildenafil than in patients treated with iNO, defined as the absence of PH on echocardiography on day 14 without pulmonary vasodilator therapy and without treatment failure and/or death within the first 28 days after birth. PH is defined as systolic pulmonary arterial pressure  $> 2/3$  systolic systemic pressure and/or right ventricular (RV) dilatation/septal displacement and RV dysfunction +/- left ventricular dysfunction.

The secondary outcomes are:

(1) change in OI after 12 and 24 hours of therapy

(2) overall mortality

(3) the incidence of treatment failure which is defined as:

- inability to maintain preductal saturations above 85% ( $\pm 7$  kPa or 52 mmHg) or postductal saturations above 70% ( $\pm 5.3$  kPa or 40 mmHg)
- and/or increase in  $\text{CO}_2 > 70$  mmHg (9.3 kPa) despite optimization of ventilator management
- and/or inadequate oxygen delivery with metabolic acidosis defined as lactate  $\geq 5$  mmol/l and pH  $< 7.15$  and/or hypotension resistant to fluid therapy and adequate inotropic support resulting in a urine output  $< 0.5$  ml/kg/hour
- and/or lactate  $\geq 5$  mmol/l and pH  $< 7.15$
- and/or OI consistently  $\geq 40$

(4) time on intervention drug, defined as intervention drug free days after initiation of the intervention, calculated on day 14

(5) need for ECMO



1  
2  
3 (6) ventilator free days on day 28  
4

5 (7) the use of drugs for PH treatment during the hospital admission  
6  
7

8 (8) the use of pulmonary and/or cardiac medication at discharge and its total duration of  
9 administration  
10

11 (9) short-term and long-term PH on echocardiography at 24 hours, 28 days/discharge and 6 and 12  
12 months  
13  
14

15 (10) the incidence of chronic lung disease  
16  
17

18 (11) the development of neurological abnormalities evaluated with ultrasound of the brain before  
19 the start of the trial, after surgery and before discharge  
20  
21

22 (12) the external validation of the sildenafil PKPD model for the pharmacokinetics and the  
23 pharmacodynamic effects of sildenafil  
24  
25

26 Safety outcomes include adverse events due to the study drugs and the vasoactive-inotropic support  
27 score (VIS).  
28  
29

### 30 31 **Patients** 32

33  
34 Infants diagnosed with CDH who have PH in the first week after birth, are eligible for the trial if born  
35 at or after a gestational age of 34 weeks. The diagnosis of PH is defined as at least two of the  
36 following four criteria: (I) systolic pulmonary arterial pressure > 2/3 systolic systemic pressure  
37 estimated by echocardiography. (II) RV dilatation/septal displacement, RV dysfunction +/- left  
38 ventricular dysfunction. (III) Pre-post ductal SpO<sub>2</sub> difference > 10%. (IV) OI >20. Exclusion criteria are  
39 a severe chromosomal anomaly which may imply a decision to stop or not to start life-saving medical  
40 treatment, severe cardiac anomaly expected to need corrective surgery in the first 60 days of life,  
41 renal anomalies associated with oligohydramnios, severe orthopedic and skeletal deformities, which  
42 are likely to influence thoracic, and / or lung development and severe anomalies of the central  
43 nervous system. Patients who are born in another center and transported with iNO are also excluded  
44 from the trial. Patients who received fetal interventions (trachea balloon placement) are not  
45 excluded.  
46  
47  
48  
49  
50  
51  
52  
53

54  
55 Following antenatal diagnosis, the parents are counselled and informed about the study. Also, they  
56 receive a patient information letter and an informed consent form . If the patient is not born in a  
57 participating center or the diagnosis of CDH was not known, parents are counselled after the  
58 diagnosis of CDH and are informed about the study. Also, they receive written information and an  
59  
60

1  
2  
3 informed consent form. This informed consent form contains consent for the trial and for collection  
4 of data and material for future research.  
5

6  
7 For the development of the protocol the SPIRIT reporting guidelines have been used [16]. This  
8 publication is based on protocol version 4, June 13<sup>th</sup> 2018.  
9

## 10 11 **Patient and public involvement** 12

13  
14 Patients and the public were not involved in the development of the trial protocol. However, CDH UK  
15 Sparks, as a parent organization, has assessed and commented on the protocol and as provided  
16 start-up funding as also mentioned in the funding statement. This organization is and will be regularly  
17 informed on progress and results of the trial.  
18  
19

## 20 21 **Study procedures** 22

### 23 24 *Baseline assessment* 25

26 Antenatal ultrasound data about the characteristics of the CDH are collected. These data include the  
27 observed/expected lung-head ratio, position of the liver and stomach and the amniotic fluid index.  
28 An MRI or an ultrasound is performed depending on local experience and possibilities. If an MRI is  
29 performed, the observed/expected fetal lung volume will be calculated. Also data on prenatal  
30 interventions are collected. In all mothers, a planned vaginal or caesarean delivery is pursued.  
31  
32  
33

### 34 35 *Randomization, intervention and blinding* 36

37  
38 When meeting the inclusion criteria, the patients are randomized with computer generated  
39 concealed allocation, made by the independent statistician of the Data Safety and Monitoring Board.  
40 Blocked randomization with stratification by center is used to achieve equal distribution of the two  
41 interventions among the participants.  
42  
43

44  
45 Postnatally, infants are treated according to a standardized protocol for patients with CDH, which is  
46 implemented in all participating centers. This protocol was developed with the available evidence  
47 and consensus between the participating centers and was updated in June 2016 [16, 22]. If the  
48 patient is diagnosed with PH in the first week of life, the patient will be allocated to one of the two  
49 study drugs (figure 1). iNO is provided by a tank connected to a ventilator. Different devices are used  
50 in different centers. Some centers use integrated systems, making it impossible to disconnect the  
51 iNO tank and replace it with another gas to facilitate a blinded intervention. Therefore, the study is  
52 open label. iNO is given with a starting dose of 20 ppm, which is the maximum dose [17, 18].  
53  
54  
55

56  
57 Sildenafil is given intravenously, using a loading dose of 0.4mg/kg in 3 hours, followed by continuous  
58 infusion of 1.6mg/kg/day [19, 20]. To wean the study drugs a standard protocol is followed (figure 2).  
59  
60

The allocated drugs will be restarted as per protocol if criteria for its use are met again before the age of 14 days. After day 14 treatment of PH will be at the discretion of the local medical team and the study drug can be changed to, for instance, sildenafil orally. The use of bosentan next to the study treatment is allowed.

The intervention will be prematurely stopped when the patient meets one or more of the defined failure criteria, described at point three of the secondary outcomes. Further treatment will then be at the discretion of the medical team and iNO and sildenafil can both be given outside the study protocol. An ECMO-procedure may then be started in centers where ECMO is available. Data of all patients are used in the intention-to-treat analysis.

### Follow up

After day 14, additional clinical data, such as time on ventilator support (days) and the use of drugs for the treatment of PH, are collected to answer the secondary outcome questions. Also, echocardiographic measurements are taken at 6 and 12 months to evaluate the presence of chronic PH (table 1)

Table 1 Procedures and measurements

|                         | Day 0-7 before start therapy | 3 hrs after start sildenafil | 12hrs after start | 8 am after start | 24hrs after start | Day of surgery, pre-operatively | Day after surgery | Day of ECMO, pre-cannulation | 8 am after start ECMO | Day 14 | Day 28 / before discharge | Day 56 | 6 mnth | 12 mnth |
|-------------------------|------------------------------|------------------------------|-------------------|------------------|-------------------|---------------------------------|-------------------|------------------------------|-----------------------|--------|---------------------------|--------|--------|---------|
| Echocardiography        | X                            |                              |                   |                  | X                 |                                 |                   |                              |                       | X      | X                         |        | X      | X       |
| Calculation OI          | X                            |                              | X                 |                  | X                 |                                 |                   |                              |                       |        |                           |        |        |         |
| Calculation VIS score   | X                            |                              | X                 |                  | X                 |                                 |                   |                              |                       |        |                           |        |        |         |
| Blood sample            | X                            |                              |                   | X                |                   | X                               | X                 | X                            | X                     | X      |                           |        |        |         |
| Tracheal aspirate       | X                            |                              |                   | X                |                   | X                               | X                 | X                            | X                     | X      |                           |        |        |         |
| Urine sample            | X                            |                              |                   | X                |                   | X                               | X                 | X                            | X                     | X      |                           |        |        |         |
| Severity of CLD         |                              |                              |                   |                  |                   |                                 |                   |                              |                       |        | X                         | X      |        |         |
| Ultrasound brain        | X                            |                              |                   |                  |                   |                                 | X                 |                              |                       |        |                           |        |        |         |
| Sildenafil plasma level |                              | X                            |                   | X                |                   | X                               | X                 |                              | X                     |        |                           |        |        |         |

OI: oxygenation index; VIS score: vasoactive-inotropic support score; CLD: chronic lung disease; ECMO: extracorporeal membrane oxygenation

### *Data collection*

Echocardiography parameters are measured by local physicians, centrally collected and reviewed by two blinded independent physicians to reduce inter-observer variation. Demographic and neonatal characteristics as well as data on the clinical course of all patients are entered in a password protected web-based database in Rotterdam (OpenClinica). Upon request the collected data will be available. All centers will keep a logbook of the number of non-participants, including the reasons for not participating. Study documents are securely stored at each study site for 15 years.

### *Laboratory testing*

Blood, urine and tracheal samples are collected in most centers during the trial. Blood samples are collected before the start of the study and at different time points until day 14. Some samples will be used to externally validate a NONMEM prediction model for sildenafil. The other samples will be used in future research on biomarkers to predict severity and outcome of PH in CDH patients. The samples are centrifuged for 6 minutes at 3000 rpm [21]. Thereafter, the plasma is removed and stored at  $-20$  degrees Celsius or colder. The total amount of blood taken is maximal 2.5 % of the circulating volume. Blood sampling will only be done if a central or peripheral line is still present and/or in combination with routine laboratory measurements. This way blood sampling is a minimal burden for the patient.

Tracheal aspirate for proteomic analysis is also collected at different time points during routine tracheal suctioning in ventilated patients. Protein profiling with proteomics is used to identify specific groups of proteins that are involved in the pathogenesis of PH. The tracheal aspirates is centrifuged for 6 minutes at 3000 rpm and stored at  $-80$  degrees Celsius [43].

Also, 8-hour urine is collected at different time points. Two samples of 5 ml are taken and stored at  $-20$  degrees Celsius or colder.

### *Withdrawal of participants*

Parents may decide to withdraw from the study at any time without any consequences. The investigator can decide to withdraw a patient from the study for urgent medical reasons. In some cases, there may be exclusion criteria, which were not known before randomization. If this is the case, the patient will be withdrawn from the study after contacting the study coordinator. With consent of the parents data will still be collected, stored and analyzed to perform an intention-to-treat analysis. These children will be treated according to standard practice [9, 15].

### Sample size calculation

We powered our study using PH at day 14 as primary outcome. Lusk et al. showed that PH in CDH patients on day 14 has a positive predictive value of 0.8 for death, death or ventilation, and death or ventilator support. PH on day 14 is observed in 64% of CDH patients [22].

If we assume a 25% relative reduction of PH to 48%, a sample size of 300 patients (150 patients per group) is needed to obtain a power of 80%. This will match a number needed to treat of 6.25. Taking missing data and the effects of correction for covariates into account, we adjust this sample size to 330 patients. In the collaborating centers 550 patients will be born in three years. Based on our earlier trial (VICI trial) we expect to have an inclusion rate of 60%. Therefore, the inclusion of 330 patients should be reached in three years.

### Data analysis

The patients will be analyzed according to the group they are randomized to (intention-to-treat analysis). A p-value (two-sided) < 0.05 is considered significant in all analyses. The primary endpoint PH will be analyzed using multiple logistic regression with randomization arm, center, observed/expected head-lung ratio, position of the liver, side of the defect, defect size and ventilation modality as independent variables [23]. If necessary, multiple imputation using the fully conditional specification method will be used to account for missing data in the independent variables.

The following analyses will be performed for the secondary outcomes. The distribution of VIS score in all study participants will be compared between t=0 and t=12 hours after initiation of drug administration using a Wilcoxon signed rank test. The distribution of changes in OI and VIS score from t=0 to t=12 and t=24 hours will be compared between the randomization groups with a Mann-Whitney test. The overall mortality in the first year of life will be compared between the randomization groups with Kaplan-Meier curves and the log-rank test. The number of treatment failures, the need for ECMO (in ECMO centers), and the need for medication for pulmonary hypertension or chronic lung disease at discharge, and during the first year of life, will be compared between randomization groups with chi-square tests. The number of study drug free days at day 14, the number of ventilation-free days until day 28, the fraction of days with need for medical treatment (excluding the study drug) for PH during the hospital admission, and the severity of chronic lung disease using the Bancalari definition, will be compared between randomization groups with Mann-Whitney tests. Deaths will be counted as the worst outcome in these analyses, in accordance with the intention-to-treat principle. The presence of pulmonary hypertension at 28

1  
2  
3 days/discharge, 6 and 12 months according to the echocardiographic parameters will be compared  
4  
5 between randomization groups with a chi-square test.  
6

7 To externally validate the pharmacokinetic model of sildenafil and its active metabolite (built in  
8 NONMEM) Normalized prediction distribution errors (NPDE) and Visual Predictive Check (VPC) will be  
9 used. Furthermore, the model will be used to predict the drug concentrations from the new data  
10 set using simulations, in which we expect that the difference will be less than 20%. To find a  
11 relationship between the concentration of sildenafil, its active metabolite and the clinical effects,  
12 such as OI, VIS score and echocardiography measures, a Mann-Whitney or T test will be used.  
13  
14  
15  
16

### 17 **Safety reporting and trial oversight**

18  
19 All severe adverse events (SAEs) and suspected unexpected serious adverse reactions (SUSARs) are  
20 reported from the enrolment until 12 month follow-up. Persistent or significant disability or  
21 incapacity that was not expected with the given O/E LHR is evaluated as an SAE. An elective hospital  
22 admission is not a SAE. All SAEs and SUSARs are reported to the approving ethics committees in  
23 accordance with their requirements. We will report the SAEs and SUSARs that result in death or are  
24 life threatening within 7 days of first knowledge. All other SAEs and SUSARs will be reported within a  
25 period of maximum 15 days. Once a year throughout the clinical trial, we will submit a safety report  
26 to the approving ethics committees and competent authorities of the countries involved.  
27  
28  
29  
30  
31  
32  
33

34 The data safety monitoring board will monitor the incidence of mortality on a continuous basis. If at  
35 some point a large difference in mortality between the two treatment groups is noticed, the data  
36 safety monitoring board may recommend ending the study.  
37  
38  
39

40 Insurance will cover compensation to patients who suffer harm from trial participation.  
41

### 42 **Ethics and dissemination**

43  
44 Ethics approval has been granted by the local ethics committee in Rotterdam (MEC-2017-324) and by  
45 the central Committee on Research Involving Human Subjects (NL60229.078.17) in the Netherlands.  
46 Important amendments will be communicated to all relevant parties. The study will be conducted  
47 according to the principles of the Declaration of Helsinki, in accordance with the Medical Research  
48 Involving Human Subjects Act, and national rules and regulations on personal data protection.  
49 Parental informed consent will be obtained. The results of this study will be disseminated via peer-  
50 reviewed publications and implemented in the international guidelines for the treatment of  
51 newborns with CDH.  
52  
53  
54  
55  
56  
57  
58  
59  
60

## Literature

1. Snoek, K.G., et al., *Conventional Mechanical Ventilation Versus High-frequency Oscillatory Ventilation for Congenital Diaphragmatic Hernia: A Randomized Clinical Trial (The VICI-trial)*. *Ann Surg*, 2015.
2. Robinson, P.D. and D.A. Fitzgerald, *Congenital diaphragmatic hernia*. *Paediatr Respir Rev*, 2007. **8**(4): p. 323-34; quiz 334-5.
3. Galie, N., et al., *Guidelines for the diagnosis and treatment of pulmonary hypertension: the Task Force for the Diagnosis and Treatment of Pulmonary Hypertension of the European Society of Cardiology (ESC) and the European Respiratory Society (ERS), endorsed by the International Society of Heart and Lung Transplantation (ISHLT)*. *Eur Heart J*, 2009. **30**(20): p. 2493-537.
4. Vali, P. and S. Lakshminrusimha, *The Fetus Can Teach Us: Oxygen and the Pulmonary Vasculature*. *Children (Basel)*, 2017. **4**(8).
5. Putnam, L.R., et al., *Evaluation of Variability in Inhaled Nitric Oxide Use and Pulmonary Hypertension in Patients With Congenital Diaphragmatic Hernia*. *JAMA Pediatr*, 2016.
6. Ichinose, F., J.D. Roberts, Jr., and W.M. Zapol, *Inhaled nitric oxide: a selective pulmonary vasodilator: current uses and therapeutic potential*. *Circulation*, 2004. **109**(25): p. 3106-11.
7. *Inhaled nitric oxide and hypoxic respiratory failure in infants with congenital diaphragmatic hernia. The Neonatal Inhaled Nitric Oxide Study Group (NINOS)*. *Pediatrics*, 1997. **99**(6): p. 838-45.
8. Clark, R.H., et al., *Low-dose nitric oxide therapy for persistent pulmonary hypertension of the newborn. Clinical Inhaled Nitric Oxide Research Group*. *N Engl J Med*, 2000. **342**(7): p. 469-74.
9. Reiss, I., et al., *Standardized postnatal management of infants with congenital diaphragmatic hernia in Europe: the CDH EURO Consortium consensus*. *Neonatology*, 2010. **98**(4): p. 354-64.
10. Kelly, L.E., A. Ohlsson, and P.S. Shah, *Sildenafil for pulmonary hypertension in neonates*. *Cochrane Database Syst Rev*, 2017. **8**: p. CD005494.
11. Lakshminrusimha, S., et al., *Milrinone in congenital diaphragmatic hernia - a randomized pilot trial: study protocol, review of literature and survey of current practices*. *Matern Health Neonatol Perinatol*, 2017. **3**: p. 27.
12. Noori, S., et al., *Cardiovascular effects of sildenafil in neonates and infants with congenital diaphragmatic hernia and pulmonary hypertension*. *Neonatology*, 2007. **91**(2): p. 92-100.
13. Bialkowski, A., F. Moenkemeyer, and N. Patel, *Intravenous sildenafil in the management of pulmonary hypertension associated with congenital diaphragmatic hernia*. *Eur J Pediatr Surg*, 2015. **25**(2): p. 171-6.
14. Kipfmueller, F., et al., *Continuous intravenous sildenafil as an early treatment in neonates with congenital diaphragmatic hernia*. *Pediatr Pulmonol*, 2018.
15. Snoek, K.G., et al., *Standardized Postnatal Management of Infants with Congenital Diaphragmatic Hernia in Europe: The CDH EURO Consortium Consensus - 2015 Update*. *Neonatology*, 2016. **110**(1): p. 66-74.
16. Chan, A.W., et al., *SPIRIT 2013 statement: defining standard protocol items for clinical trials*. *Ann Intern Med*, 2013. **158**(3): p. 200-7.
17. Tworetzky, W., et al., *Inhaled nitric oxide in neonates with persistent pulmonary hypertension*. *Lancet*, 2001. **357**(9250): p. 118-20.
18. Barrington, K.J., et al., *Nitric oxide for respiratory failure in infants born at or near term*. *Cochrane Database Syst Rev*, 2017. **1**: p. CD000399.
19. Steinhorn, R.H., et al., *Intravenous sildenafil in the treatment of neonates with persistent pulmonary hypertension*. *J Pediatr*, 2009. **155**(6): p. 841-847 e1.



- 1  
2  
3 20. Mukherjee, A., et al., *Population pharmacokinetics of sildenafil in term neonates: evidence of*  
4 *rapid maturation of metabolic clearance in the early postnatal period.* Clin Pharmacol Ther,  
5 2009. **85**(1): p. 56-63.  
6  
7 21. Snoek, K.G., et al., *High-Sensitivity Troponin T and N-Terminal Pro-Brain Natriuretic Peptide in*  
8 *Prediction of Outcome in Congenital Diaphragmatic Hernia: Results from a Multicenter,*  
9 *Randomized Controlled Trial.* J Pediatr, 2016. **173**: p. 245-249 e4.  
10  
11 22. Lusk, L.A., et al., *Persistence of pulmonary hypertension by echocardiography predicts short-*  
12 *term outcomes in congenital diaphragmatic hernia.* J Pediatr, 2015. **166**(2): p. 251-6 e1.  
13  
14 23. Lally, K.P., et al., *Standardized reporting for congenital diaphragmatic hernia--an*  
15 *international consensus.* J Pediatr Surg, 2013. **48**(12): p. 2408-15.  
16

### 17 Author contributions

18  
19 All investigators of the Consortium described below, have contributed to the design of the trial  
20 protocol and have approved this version for submission. Coordinating investigator S Cochius – den  
21 Otter and Prof D Tibboel are responsible for all aspects of the study conduct, practically study  
22 oversight, recruitment, training of the participating hospitals, reporting of the SAEs and SUSARs,  
23 outcome assessment and data management. Prof D Tibboel, Prof K Allegaert, Dr T Schaible, Dr A van  
24 Heijst, Dr A Greenough and Dr N Patel are responsible for study oversight. J van Rosmalen has  
25 contributed to statistical methods and will be involved in interpretation of the results. S Cochius- den  
26 Otter will lead the dissemination and translation of results with the contribution of all investigators  
27 of the CDH EURO Consortium. Also all members will have authority over the data.  
28  
29  
30  
31  
32  
33

### 34 Funding statement

35  
36 This work was supported by CDH UK Sparks grant number 16EMC01 and by Stichting Sophia  
37 Kinderziekenhuis Fonds grant number S17-19.  
38  
39  
40  
41

### 42 Competing interests

43  
44 None  
45  
46  
47

### 48 Figure 1 Trial flow chart

49  
50 Flow chart showing the steps of the trial, from birth until 12 months. CDH: congenital diaphragmatic  
51 hernia; SAE: serious adverse event; SUSAR: suspected unexpected serious adverse event  
52  
53  
54

### 55 Figure 2 Protocol to wean study drug

56  
57 Flow chart showing the protocol to wean off inhaled nitric oxide or intravenous sildenafil. iNO:  
58 inhaled nitric oxide; ppm: parts per million  
59  
60



Figure 1 Trial flow chart

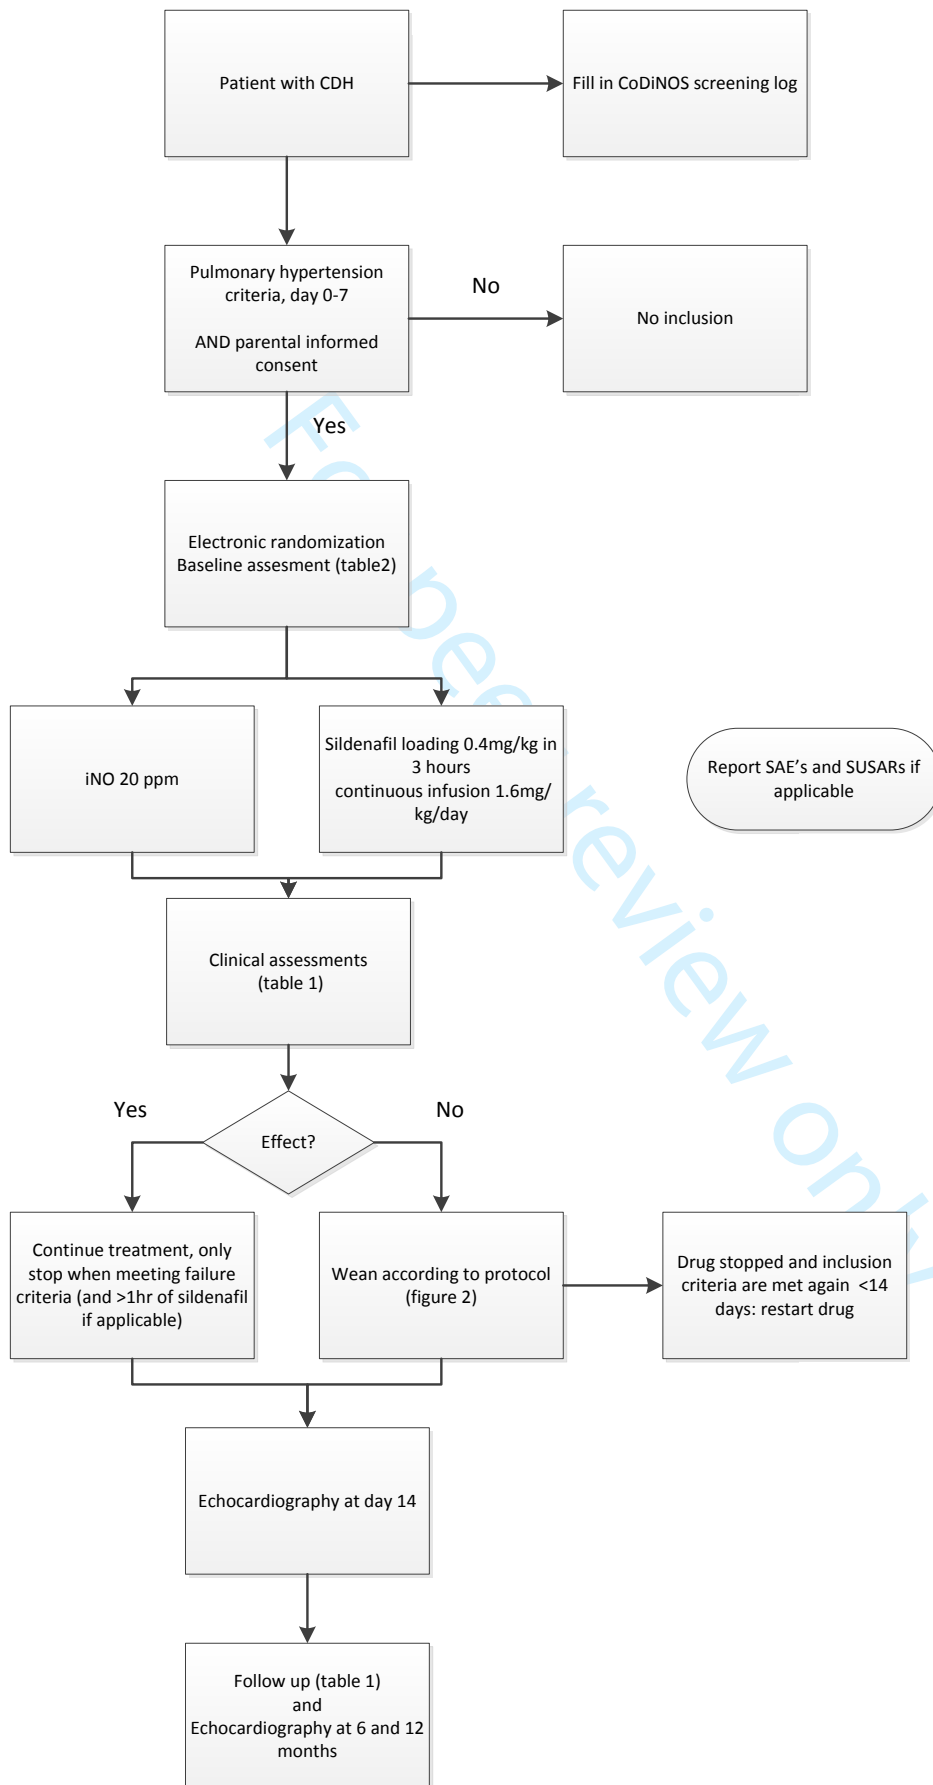

CDH: congenital diaphragmatic hernia; SAE: serious adverse event; SUSAR: suspected unexpected serious adverse event

Figure 2 Protocol to wean study drug

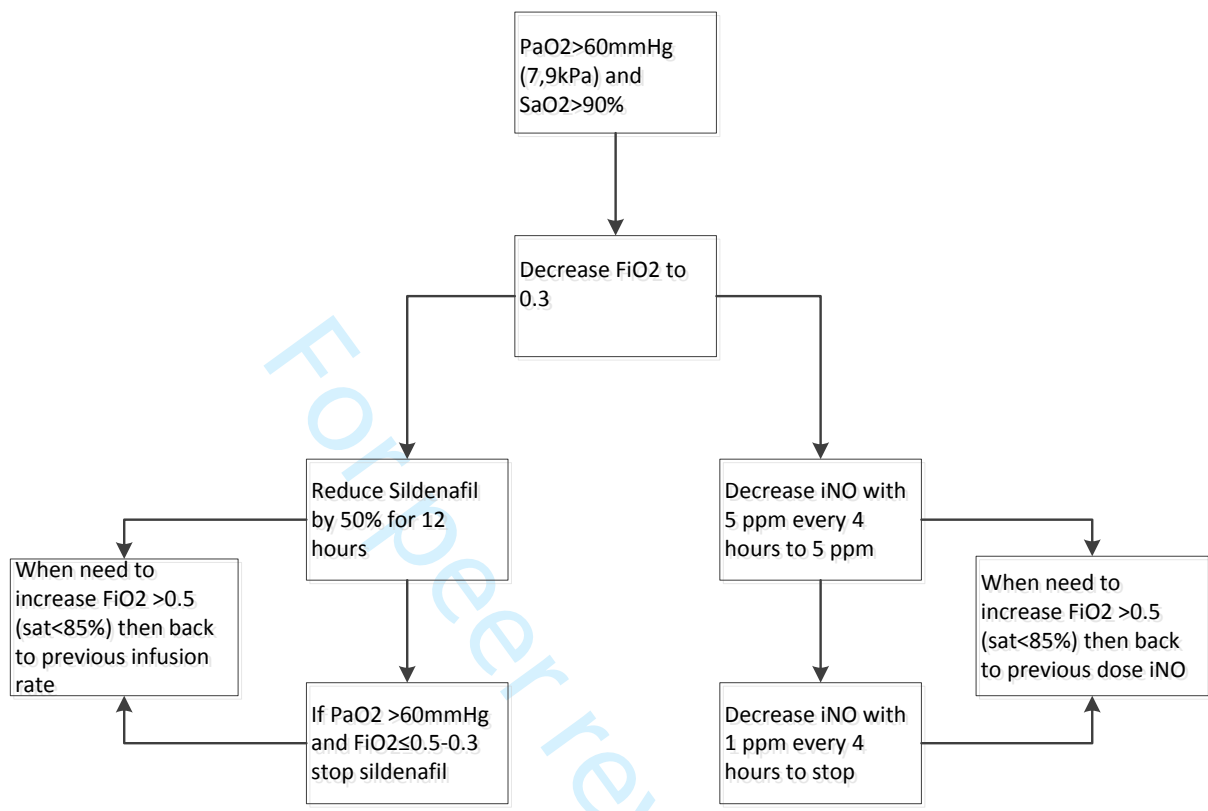

**Appendix:**

## CDH Euro Consortium:

Germany: Florian Kipfmüller, Department of Neonatology and Pediatric Critical Care Medicine, University Children's Hospital, Bonn. Spain: Maria Dolores Elorza, Ana Sanchez, Neonatology Department, Leopoldo Martinez, Pediatric Surgery Department, Carlos Labrandero, Viviana Arreo, Pediatric Cardiology Division, Hospital Universitario La Paz, Madrid. Africa Pertierra Cortada, Jordi Clotet Caba Neonatology Department, Hospital Sant Joan de Déu, Barcelona. Marta Aguar, Ana Gimeno, Raquel Escrig, Division of Neonatology, University and Polytechnic Hospital La Fe Valencia. Italy: Irma Capolupo, Pietro Bagolan, Department of Medical and Surgical Neonatology, Bambino Gesù Children's Hospital, Rome. Fabrizio Ciralli, Genny Raffaeli, Giacomo Cavallaro, Valentina Condò, Fondazione IRCCS Ca' Granda Ospedale Maggiore Policlinico, NICU, University of Milan, Department of Clinical Sciences and Community Health. United Kingdom: United Kingdom - Paul D. Losty Department Of Paediatric Surgery, Division of Child Health, Alder Hey Children's Hospital NHS Foundation Trust, University of Liverpool, Marie Horan, Paediatric Intensive Care Alder Hey Children's Hospital NHS Foundation Trust, University of Liverpool. Nimish V. Subhedar, NICU, Liverpool Women's Hospital, Liverpool. Yogen Singh, Department of Neonatology, Cambridge University Hospitals NHS Foundation trust, Cambridge. Emma E. Williams, The Asthma UK Centre in Allergic Mechanisms of Asthma; Women and Children's Health, School of Life Course Sciences, Faculty of Life Sciences and Medicine, King's College London, Denmark Hill, London. Theodore Dassios, Ravindra Bhat, King's College Hospital NHS Foundation Trust, London. Austria: Jennifer B. Brandt, Alexandra Kreissl, Angelika Berger, Department of Pediatrics and Adolescent Medicine, Division of Neonatology, Pediatric Intensive Care Medicine and Neuropediatrics, Medical University of Vienna. Berndt Urlesberger, Division of Neonatology, Department of Pediatrics and Adolescent Medicine, Medical University of Graz. Sweden: Carmen Mesas Burgos, Björn Frenckner, Department of Pediatric Surgery, Björn Larsson, Pediatric Intensive Care Unit, Karolinska University Hospital, Stockholm. Portugal: Carla Pinto, Serviço de Cuidados Intensivos Pediátricos, Hospital Pediátrico, Centro Hospitalar e Universitário de Coimbra, Coimbra. Joana Saldaha, Department of Neonatology, Hospital de Santa Maria, Lisbon. Belgium: Anne Debeer, Anne Smits, Neonatology, University Hospitals Leuven, Leuven. Norway: Ragnhild Emblem, Department of Pediatric Surgery, Oslo University Hospital, Oslo. Canada: Richard Keijzer, Department of Surgery, Yassar Elsayed, Department of Neonatology, Pediatrics and Child Health, University of Manitoba and Children's Hospital Research Institute of Manitoba. Australia: David Tingay, Department of Neonatology, Royal Children's Hospital, Melbourne, Australia. The Netherlands: Ulrike Kraemer, Intensive Care and department of Pediatric Surgery, Erasmus MC, Rotterdam.

# Reporting checklist for protocol of a clinical trial.

Based on the SPIRIT guidelines.

## Instructions to authors

Complete this checklist by entering the page numbers from your manuscript where readers will find each of the items listed below.

Your article may not currently address all the items on the checklist. Please modify your text to include the missing information. If you are certain that an item does not apply, please write "n/a" and provide a short explanation.

Upload your completed checklist as an extra file when you submit to a journal.

In your methods section, say that you used the SPIRIT reporting guidelines, and cite them as:

Chan A-W, Tetzlaff JM, Altman DG, Laupacis A, Gøtzsche PC, Krleža-Jerić K, Hróbjartsson A, Mann H, Dickersin K, Berlin J, Doré C, Parulekar W, Summerskill W, Groves T, Schulz K, Sox H, Rockhold FW, Rennie D, Moher D. SPIRIT 2013 Statement: Defining standard protocol items for clinical trials. *Ann Intern Med.* 2013;158(3):200-207

|                                             |                     | Reporting Item                                                                                               | Page Number     |
|---------------------------------------------|---------------------|--------------------------------------------------------------------------------------------------------------|-----------------|
| Title                                       | <a href="#">#1</a>  | Descriptive title identifying the study design, population, interventions, and, if applicable, trial acronym | 1               |
| Trial registration                          | <a href="#">#2a</a> | Trial identifier and registry name. If not yet registered, name of intended registry                         | 2               |
| Trial registration: data set                | <a href="#">#2b</a> | All items from the World Health Organization Trial Registration Data Set                                     | 8               |
| Protocol version                            | <a href="#">#3</a>  | Date and version identifier                                                                                  | 8               |
| Funding                                     | <a href="#">#4</a>  | Sources and types of financial, material, and other support                                                  | 14              |
| Roles and responsibilities: contributorship | <a href="#">#5a</a> | Names, affiliations, and roles of protocol contributors                                                      | 14 and appendix |
| Roles and                                   | <a href="#">#5b</a> | Name and contact information for the trial sponsor                                                           | 1               |

|    |                      |                     |                                                        |                 |
|----|----------------------|---------------------|--------------------------------------------------------|-----------------|
| 1  | responsibilities:    |                     |                                                        |                 |
| 2  | sponsor contact      |                     |                                                        |                 |
| 3  | information          |                     |                                                        |                 |
| 4  |                      |                     |                                                        |                 |
| 5  | Roles and            | <a href="#">#5c</a> | Role of study sponsor and funders, if any, in study    | 14              |
| 6  | responsibilities:    |                     | design; collection, management, analysis, and          |                 |
| 7  | sponsor and funder   |                     | interpretation of data; writing of the report; and the |                 |
| 8  |                      |                     | decision to submit the report for publication,         |                 |
| 9  |                      |                     | including whether they will have ultimate authority    |                 |
| 10 |                      |                     | over any of these activities                           |                 |
| 11 |                      |                     |                                                        |                 |
| 12 |                      |                     |                                                        |                 |
| 13 |                      |                     |                                                        |                 |
| 14 |                      |                     |                                                        |                 |
| 15 | Roles and            | <a href="#">#5d</a> | Composition, roles, and responsibilities of the        | 14              |
| 16 | responsibilities:    |                     | coordinating centre, steering committee, endpoint      |                 |
| 17 | committees           |                     | adjudication committee, data management team,          |                 |
| 18 |                      |                     | and other individuals or groups overseeing the         |                 |
| 19 |                      |                     | trial, if applicable (see Item 21a for data            |                 |
| 20 |                      |                     | monitoring committee)                                  |                 |
| 21 |                      |                     |                                                        |                 |
| 22 |                      |                     |                                                        |                 |
| 23 |                      |                     |                                                        |                 |
| 24 |                      |                     |                                                        |                 |
| 25 | Background and       | <a href="#">#6a</a> | Description of research question and justification     | 4-5             |
| 26 | rationale            |                     | for undertaking the trial, including summary of        |                 |
| 27 |                      |                     | relevant studies (published and unpublished)           |                 |
| 28 |                      |                     | examining benefits and harms for each                  |                 |
| 29 |                      |                     | intervention                                           |                 |
| 30 |                      |                     |                                                        |                 |
| 31 |                      |                     |                                                        |                 |
| 32 |                      |                     |                                                        |                 |
| 33 | Background and       | <a href="#">#6b</a> | Explanation for choice of comparators                  | 4-5             |
| 34 | rationale: choice of |                     |                                                        |                 |
| 35 | comparators          |                     |                                                        |                 |
| 36 |                      |                     |                                                        |                 |
| 37 |                      |                     |                                                        |                 |
| 38 | Objectives           | <a href="#">#7</a>  | Specific objectives or hypotheses                      | 6               |
| 39 |                      |                     |                                                        |                 |
| 40 |                      |                     |                                                        |                 |
| 41 | Trial design         | <a href="#">#8</a>  | Description of trial design including type of trial    | 6               |
| 42 |                      |                     | (eg, parallel group, crossover, factorial, single      |                 |
| 43 |                      |                     | group), allocation ratio, and framework (eg,           |                 |
| 44 |                      |                     | superiority, equivalence, non-inferiority,             |                 |
| 45 |                      |                     | exploratory)                                           |                 |
| 46 |                      |                     |                                                        |                 |
| 47 |                      |                     |                                                        |                 |
| 48 |                      |                     |                                                        |                 |
| 49 | Study setting        | <a href="#">#9</a>  | Description of study settings (eg, community clinic,   | 6, 14, appendix |
| 50 |                      |                     | academic hospital) and list of countries where         |                 |
| 51 |                      |                     | data will be collected. Reference to where list of     |                 |
| 52 |                      |                     | study sites can be obtained                            |                 |
| 53 |                      |                     |                                                        |                 |
| 54 |                      |                     |                                                        |                 |
| 55 |                      |                     |                                                        |                 |
| 56 | Eligibility criteria | <a href="#">#10</a> | Inclusion and exclusion criteria for participants. If  | 7               |
| 57 |                      |                     | applicable, eligibility criteria for study centres and |                 |
| 58 |                      |                     |                                                        |                 |
| 59 |                      |                     |                                                        |                 |
| 60 |                      |                     |                                                        |                 |

|    |                      |                                                                                 |         |
|----|----------------------|---------------------------------------------------------------------------------|---------|
|    |                      | individuals who will perform the interventions (eg, surgeons, psychotherapists) |         |
| 1  |                      |                                                                                 |         |
| 2  |                      |                                                                                 |         |
| 3  |                      |                                                                                 |         |
| 4  | Interventions:       | <a href="#">#11a</a> Interventions for each group with sufficient detail        | 8       |
| 5  | description          | to allow replication, including how and when they                               |         |
| 6  |                      | will be administered                                                            |         |
| 7  |                      |                                                                                 |         |
| 8  |                      |                                                                                 |         |
| 9  | Interventions:       | <a href="#">#11b</a> Criteria for discontinuing or modifying allocated          | 9       |
| 10 | modifications        | interventions for a given trial participant (eg, drug                           |         |
| 11 |                      | dose change in response to harms, participant                                   |         |
| 12 |                      | request, or improving / worsening disease)                                      |         |
| 13 |                      |                                                                                 |         |
| 14 |                      |                                                                                 |         |
| 15 |                      |                                                                                 |         |
| 16 | Interventions:       | <a href="#">#11c</a> Strategies to improve adherence to intervention            | n/a     |
| 17 | adherence            | protocols, and any procedures for monitoring                                    |         |
| 18 |                      | adherence (eg, drug tablet return; laboratory tests)                            |         |
| 19 |                      |                                                                                 |         |
| 20 |                      |                                                                                 |         |
| 21 | Interventions:       | <a href="#">#11d</a> Relevant concomitant care and interventions that           | 8       |
| 22 | concomitant care     | are permitted or prohibited during the trial                                    |         |
| 23 |                      |                                                                                 |         |
| 24 |                      |                                                                                 |         |
| 25 | Outcomes             | <a href="#">#12</a> Primary, secondary, and other outcomes,                     | 6-7     |
| 26 |                      | including the specific measurement variable (eg,                                |         |
| 27 |                      | systolic blood pressure), analysis metric (eg,                                  |         |
| 28 |                      | change from baseline, final value, time to event),                              |         |
| 29 |                      | method of aggregation (eg, median, proportion),                                 |         |
| 30 |                      | and time point for each outcome. Explanation of                                 |         |
| 31 |                      | the clinical relevance of chosen efficacy and harm                              |         |
| 32 |                      | outcomes is strongly recommended                                                |         |
| 33 |                      |                                                                                 |         |
| 34 |                      |                                                                                 |         |
| 35 |                      |                                                                                 |         |
| 36 |                      |                                                                                 |         |
| 37 |                      |                                                                                 |         |
| 38 | Participant timeline | <a href="#">#13</a> Time schedule of enrolment, interventions                   | Table 1 |
| 39 |                      | (including any run-ins and washouts),                                           |         |
| 40 |                      | assessments, and visits for participants. A                                     |         |
| 41 |                      | schematic diagram is highly recommended (see                                    |         |
| 42 |                      | Figure)                                                                         |         |
| 43 |                      |                                                                                 |         |
| 44 |                      |                                                                                 |         |
| 45 |                      |                                                                                 |         |
| 46 | Sample size          | <a href="#">#14</a> Estimated number of participants needed to                  | 11      |
| 47 |                      | achieve study objectives and how it was                                         |         |
| 48 |                      | determined, including clinical and statistical                                  |         |
| 49 |                      | assumptions supporting any sample size                                          |         |
| 50 |                      | calculations                                                                    |         |
| 51 |                      |                                                                                 |         |
| 52 |                      |                                                                                 |         |
| 53 |                      |                                                                                 |         |
| 54 | Recruitment          | <a href="#">#15</a> Strategies for achieving adequate participant               | 11      |
| 55 |                      | enrolment to reach target sample size                                           |         |
| 56 |                      |                                                                                 |         |
| 57 |                      |                                                                                 |         |
| 58 | Allocation:          | <a href="#">#16a</a> Method of generating the allocation sequence (eg,          | 8       |
| 59 |                      |                                                                                 |         |

|    |                      |                      |                                                        |      |
|----|----------------------|----------------------|--------------------------------------------------------|------|
| 1  | sequence             |                      | computer-generated random numbers), and list of        |      |
| 2  | generation           |                      | any factors for stratification. To reduce              |      |
| 3  |                      |                      | predictability of a random sequence, details of any    |      |
| 4  |                      |                      | planned restriction (eg, blocking) should be           |      |
| 5  |                      |                      | provided in a separate document that is                |      |
| 6  |                      |                      | unavailable to those who enrol participants or         |      |
| 7  |                      |                      | assign interventions                                   |      |
| 8  |                      |                      |                                                        |      |
| 9  |                      |                      |                                                        |      |
| 10 |                      |                      |                                                        |      |
| 11 | Allocation           | <a href="#">#16b</a> | Mechanism of implementing the allocation               | 8    |
| 12 | concealment          |                      | sequence (eg, central telephone; sequentially          |      |
| 13 | mechanism            |                      | numbered, opaque, sealed envelopes), describing        |      |
| 14 |                      |                      | any steps to conceal the sequence until                |      |
| 15 |                      |                      | interventions are assigned                             |      |
| 16 |                      |                      |                                                        |      |
| 17 |                      |                      |                                                        |      |
| 18 |                      |                      |                                                        |      |
| 19 | Allocation:          | <a href="#">#16c</a> | Who will generate the allocation sequence, who         | 8    |
| 20 | implementation       |                      | will enrol participants, and who will assign           |      |
| 21 |                      |                      | participants to interventions                          |      |
| 22 |                      |                      |                                                        |      |
| 23 |                      |                      |                                                        |      |
| 24 |                      |                      |                                                        |      |
| 25 | Blinding (masking)   | <a href="#">#17a</a> | Who will be blinded after assignment to                | 10   |
| 26 |                      |                      | interventions (eg, trial participants, care providers, |      |
| 27 |                      |                      | outcome assessors, data analysts), and how             |      |
| 28 |                      |                      |                                                        |      |
| 29 |                      |                      |                                                        |      |
| 30 | Blinding (masking):  | <a href="#">#17b</a> | If blinded, circumstances under which unblinding       | n/a  |
| 31 | emergency            |                      | is permissible, and procedure for revealing a          |      |
| 32 | unblinding           |                      | participant's allocated intervention during the trial  |      |
| 33 |                      |                      |                                                        |      |
| 34 |                      |                      |                                                        |      |
| 35 |                      |                      |                                                        |      |
| 36 | Data collection plan | <a href="#">#18a</a> | Plans for assessment and collection of outcome,        | 9-10 |
| 37 |                      |                      | baseline, and other trial data, including any related  |      |
| 38 |                      |                      | processes to promote data quality (eg, duplicate       |      |
| 39 |                      |                      | measurements, training of assessors) and a             |      |
| 40 |                      |                      | description of study instruments (eg,                  |      |
| 41 |                      |                      | questionnaires, laboratory tests) along with their     |      |
| 42 |                      |                      | reliability and validity, if known. Reference to       |      |
| 43 |                      |                      | where data collection forms can be found, if not in    |      |
| 44 |                      |                      | the protocol                                           |      |
| 45 |                      |                      |                                                        |      |
| 46 |                      |                      |                                                        |      |
| 47 |                      |                      |                                                        |      |
| 48 |                      |                      |                                                        |      |
| 49 |                      |                      |                                                        |      |
| 50 | Data collection      | <a href="#">#18b</a> | Plans to promote participant retention and             | 10   |
| 51 | plan: retention      |                      | complete follow-up, including list of any outcome      |      |
| 52 |                      |                      | data to be collected for participants who              |      |
| 53 |                      |                      | discontinue or deviate from intervention protocols     |      |
| 54 |                      |                      |                                                        |      |
| 55 |                      |                      |                                                        |      |
| 56 |                      |                      |                                                        |      |
| 57 | Data management      | <a href="#">#19</a>  | Plans for data entry, coding, security, and storage,   | 10   |
| 58 |                      |                      | including any related processes to promote data        |      |
| 59 |                      |                      |                                                        |      |
| 60 |                      |                      |                                                        |      |

quality (eg, double data entry; range checks for data values). Reference to where details of data management procedures can be found, if not in the protocol

|    |                                                  |                                                                                                                                                                                                                                                                                                                                       |                                                                                            |
|----|--------------------------------------------------|---------------------------------------------------------------------------------------------------------------------------------------------------------------------------------------------------------------------------------------------------------------------------------------------------------------------------------------|--------------------------------------------------------------------------------------------|
| 1  |                                                  |                                                                                                                                                                                                                                                                                                                                       |                                                                                            |
| 2  |                                                  |                                                                                                                                                                                                                                                                                                                                       |                                                                                            |
| 3  |                                                  |                                                                                                                                                                                                                                                                                                                                       |                                                                                            |
| 4  |                                                  |                                                                                                                                                                                                                                                                                                                                       |                                                                                            |
| 5  |                                                  |                                                                                                                                                                                                                                                                                                                                       |                                                                                            |
| 6  |                                                  |                                                                                                                                                                                                                                                                                                                                       |                                                                                            |
| 7  | Statistics:                                      | <a href="#">#20a</a>                                                                                                                                                                                                                                                                                                                  | 11-12                                                                                      |
| 8  | outcomes                                         | Statistical methods for analysing primary and secondary outcomes. Reference to where other details of the statistical analysis plan can be found, if not in the protocol                                                                                                                                                              |                                                                                            |
| 9  |                                                  |                                                                                                                                                                                                                                                                                                                                       |                                                                                            |
| 10 |                                                  |                                                                                                                                                                                                                                                                                                                                       |                                                                                            |
| 11 |                                                  |                                                                                                                                                                                                                                                                                                                                       |                                                                                            |
| 12 |                                                  |                                                                                                                                                                                                                                                                                                                                       |                                                                                            |
| 13 |                                                  |                                                                                                                                                                                                                                                                                                                                       |                                                                                            |
| 14 | Statistics: additional analyses                  | <a href="#">#20b</a>                                                                                                                                                                                                                                                                                                                  | 12                                                                                         |
| 15 |                                                  | Methods for any additional analyses (eg, subgroup and adjusted analyses)                                                                                                                                                                                                                                                              |                                                                                            |
| 16 |                                                  |                                                                                                                                                                                                                                                                                                                                       |                                                                                            |
| 17 | Statistics: analysis population and missing data | <a href="#">#20c</a>                                                                                                                                                                                                                                                                                                                  | 11                                                                                         |
| 18 |                                                  | Definition of analysis population relating to protocol non-adherence (eg, as randomised analysis), and any statistical methods to handle missing data (eg, multiple imputation)                                                                                                                                                       |                                                                                            |
| 19 |                                                  |                                                                                                                                                                                                                                                                                                                                       |                                                                                            |
| 20 |                                                  |                                                                                                                                                                                                                                                                                                                                       |                                                                                            |
| 21 |                                                  |                                                                                                                                                                                                                                                                                                                                       |                                                                                            |
| 22 |                                                  |                                                                                                                                                                                                                                                                                                                                       |                                                                                            |
| 23 |                                                  |                                                                                                                                                                                                                                                                                                                                       |                                                                                            |
| 24 | Data monitoring: formal committee                | <a href="#">#21a</a>                                                                                                                                                                                                                                                                                                                  | 12                                                                                         |
| 25 |                                                  | Composition of data monitoring committee (DMC); summary of its role and reporting structure; statement of whether it is independent from the sponsor and competing interests; and reference to where further details about its charter can be found, if not in the protocol. Alternatively, an explanation of why a DMC is not needed |                                                                                            |
| 26 |                                                  |                                                                                                                                                                                                                                                                                                                                       |                                                                                            |
| 27 |                                                  |                                                                                                                                                                                                                                                                                                                                       |                                                                                            |
| 28 |                                                  |                                                                                                                                                                                                                                                                                                                                       |                                                                                            |
| 29 |                                                  |                                                                                                                                                                                                                                                                                                                                       |                                                                                            |
| 30 |                                                  |                                                                                                                                                                                                                                                                                                                                       |                                                                                            |
| 31 |                                                  |                                                                                                                                                                                                                                                                                                                                       |                                                                                            |
| 32 |                                                  |                                                                                                                                                                                                                                                                                                                                       |                                                                                            |
| 33 |                                                  |                                                                                                                                                                                                                                                                                                                                       |                                                                                            |
| 34 |                                                  |                                                                                                                                                                                                                                                                                                                                       |                                                                                            |
| 35 |                                                  |                                                                                                                                                                                                                                                                                                                                       |                                                                                            |
| 36 | Data monitoring: interim analysis                | <a href="#">#21b</a>                                                                                                                                                                                                                                                                                                                  | 12                                                                                         |
| 37 |                                                  | Description of any interim analyses and stopping guidelines, including who will have access to these interim results and make the final decision to terminate the trial                                                                                                                                                               |                                                                                            |
| 38 |                                                  |                                                                                                                                                                                                                                                                                                                                       |                                                                                            |
| 39 |                                                  |                                                                                                                                                                                                                                                                                                                                       |                                                                                            |
| 40 |                                                  |                                                                                                                                                                                                                                                                                                                                       |                                                                                            |
| 41 |                                                  |                                                                                                                                                                                                                                                                                                                                       |                                                                                            |
| 42 | Harms                                            | <a href="#">#22</a>                                                                                                                                                                                                                                                                                                                   | 12                                                                                         |
| 43 |                                                  | Plans for collecting, assessing, reporting, and managing solicited and spontaneously reported adverse events and other unintended effects of trial interventions or trial conduct                                                                                                                                                     |                                                                                            |
| 44 |                                                  |                                                                                                                                                                                                                                                                                                                                       |                                                                                            |
| 45 |                                                  |                                                                                                                                                                                                                                                                                                                                       |                                                                                            |
| 46 |                                                  |                                                                                                                                                                                                                                                                                                                                       |                                                                                            |
| 47 |                                                  |                                                                                                                                                                                                                                                                                                                                       |                                                                                            |
| 48 |                                                  |                                                                                                                                                                                                                                                                                                                                       |                                                                                            |
| 49 | Auditing                                         | <a href="#">#23</a>                                                                                                                                                                                                                                                                                                                   | Audits are randomly performed on trials in the institute (Erasmus MC which is the sponsor) |
| 50 |                                                  | Frequency and procedures for auditing trial conduct, if any, and whether the process will be independent from investigators and the sponsor                                                                                                                                                                                           |                                                                                            |
| 51 |                                                  |                                                                                                                                                                                                                                                                                                                                       |                                                                                            |
| 52 |                                                  |                                                                                                                                                                                                                                                                                                                                       |                                                                                            |
| 53 |                                                  |                                                                                                                                                                                                                                                                                                                                       |                                                                                            |
| 54 |                                                  |                                                                                                                                                                                                                                                                                                                                       |                                                                                            |
| 55 |                                                  |                                                                                                                                                                                                                                                                                                                                       |                                                                                            |
| 56 |                                                  |                                                                                                                                                                                                                                                                                                                                       |                                                                                            |
| 57 |                                                  |                                                                                                                                                                                                                                                                                                                                       |                                                                                            |
| 58 |                                                  |                                                                                                                                                                                                                                                                                                                                       |                                                                                            |
| 59 |                                                  |                                                                                                                                                                                                                                                                                                                                       |                                                                                            |
| 60 |                                                  |                                                                                                                                                                                                                                                                                                                                       |                                                                                            |



|    |                       |                      |                                                        |     |
|----|-----------------------|----------------------|--------------------------------------------------------|-----|
| 1  | Research ethics       | <a href="#">#24</a>  | Plans for seeking research ethics committee /          | 12  |
| 2  | approval              |                      | institutional review board (REC / IRB) approval        |     |
| 3  |                       |                      |                                                        |     |
| 4  | Protocol              | <a href="#">#25</a>  | Plans for communicating important protocol             | 12  |
| 5  | amendments            |                      | modifications (eg, changes to eligibility criteria,    |     |
| 6  |                       |                      | outcomes, analyses) to relevant parties (eg,           |     |
| 7  |                       |                      | investigators, REC / IRBs, trial participants, trial   |     |
| 8  |                       |                      | registries, journals, regulators)                      |     |
| 9  |                       |                      |                                                        |     |
| 10 |                       |                      |                                                        |     |
| 11 |                       |                      |                                                        |     |
| 12 |                       |                      |                                                        |     |
| 13 | Consent or assent     | <a href="#">#26a</a> | Who will obtain informed consent or assent from        | 7-8 |
| 14 |                       |                      | potential trial participants or authorised             |     |
| 15 |                       |                      | surrogates, and how (see Item 32)                      |     |
| 16 |                       |                      |                                                        |     |
| 17 |                       |                      |                                                        |     |
| 18 | Consent or assent:    | <a href="#">#26b</a> | Additional consent provisions for collection and       | 8   |
| 19 | ancillary studies     |                      | use of participant data and biological specimens in    |     |
| 20 |                       |                      | ancillary studies, if applicable                       |     |
| 21 |                       |                      |                                                        |     |
| 22 |                       |                      |                                                        |     |
| 23 |                       |                      |                                                        |     |
| 24 | Confidentiality       | <a href="#">#27</a>  | How personal information about potential and           | 10  |
| 25 |                       |                      | enrolled participants will be collected, shared, and   |     |
| 26 |                       |                      | maintained in order to protect confidentiality         |     |
| 27 |                       |                      | before, during, and after the trial                    |     |
| 28 |                       |                      |                                                        |     |
| 29 |                       |                      |                                                        |     |
| 30 | Declaration of        | <a href="#">#28</a>  | Financial and other competing interests for            | 14  |
| 31 | interests             |                      | principal investigators for the overall trial and each |     |
| 32 |                       |                      | study site                                             |     |
| 33 |                       |                      |                                                        |     |
| 34 |                       |                      |                                                        |     |
| 35 |                       |                      |                                                        |     |
| 36 | Data access           | <a href="#">#29</a>  | Statement of who will have access to the final trial   | 14  |
| 37 |                       |                      | dataset, and disclosure of contractual agreements      |     |
| 38 |                       |                      | that limit such access for investigators               |     |
| 39 |                       |                      |                                                        |     |
| 40 |                       |                      |                                                        |     |
| 41 | Ancillary and post    | <a href="#">#30</a>  | Provisions, if any, for ancillary and post-trial care, | 12  |
| 42 | trial care            |                      | and for compensation to those who suffer harm          |     |
| 43 |                       |                      | from trial participation                               |     |
| 44 |                       |                      |                                                        |     |
| 45 |                       |                      |                                                        |     |
| 46 | Dissemination         | <a href="#">#31a</a> | Plans for investigators and sponsor to                 | 12  |
| 47 | policy: trial results |                      | communicate trial results to participants,             |     |
| 48 |                       |                      | healthcare professionals, the public, and other        |     |
| 49 |                       |                      | relevant groups (eg, via publication, reporting in     |     |
| 50 |                       |                      | results databases, or other data sharing               |     |
| 51 |                       |                      | arrangements), including any publication               |     |
| 52 |                       |                      | restrictions                                           |     |
| 53 |                       |                      |                                                        |     |
| 54 |                       |                      |                                                        |     |
| 55 |                       |                      |                                                        |     |
| 56 |                       |                      |                                                        |     |
| 57 |                       |                      |                                                        |     |
| 58 | Dissemination         | <a href="#">#31b</a> | Authorship eligibility guidelines and any intended     | 14  |
| 59 |                       |                      |                                                        |     |
| 60 |                       |                      |                                                        |     |

|    |                      |                      |                                                       |          |
|----|----------------------|----------------------|-------------------------------------------------------|----------|
| 1  | policy: authorship   |                      | use of professional writers                           |          |
| 2  | Dissemination        | <a href="#">#31c</a> | Plans, if any, for granting public access to the full | n/a      |
| 3  | policy: reproducible |                      | protocol, participant-level dataset, and statistical  |          |
| 4  | research             |                      | code                                                  |          |
| 5  |                      |                      |                                                       |          |
| 6  |                      |                      |                                                       |          |
| 7  | Informed consent     | <a href="#">#32</a>  | Model consent form and other related                  | In Dutch |
| 8  | materials            |                      | documentation given to participants and               |          |
| 9  |                      |                      | authorised surrogates                                 |          |
| 10 |                      |                      |                                                       |          |
| 11 |                      |                      |                                                       |          |
| 12 |                      |                      |                                                       |          |
| 13 | Biological           | <a href="#">#33</a>  | Plans for collection, laboratory evaluation, and      | 9        |
| 14 | specimens            |                      | storage of biological specimens for genetic or        |          |
| 15 |                      |                      | molecular analysis in the current trial and for       |          |
| 16 |                      |                      | future use in ancillary studies, if applicable        |          |
| 17 |                      |                      |                                                       |          |
| 18 |                      |                      |                                                       |          |
| 19 |                      |                      |                                                       |          |

20 The SPIRIT checklist is distributed under the terms of the Creative Commons Attribution License CC-  
 21 BY-ND 3.0. This checklist can be completed online using <https://www.goodreports.org/>, a tool made  
 22 by the [EQUATOR Network](#) in collaboration with [Penelope.ai](#)  
 23

# BMJ Open

## The CoDiNOS trial protocol: An international randomized controlled trial of intravenous sildenafil versus inhaled nitric oxide for the treatment of pulmonary hypertension in neonates with congenital diaphragmatic hernia.

|                                 |                                                                                                                                                                                                                                                                                                                                                                                                                                                                                                                                                                                                                                                                                               |
|---------------------------------|-----------------------------------------------------------------------------------------------------------------------------------------------------------------------------------------------------------------------------------------------------------------------------------------------------------------------------------------------------------------------------------------------------------------------------------------------------------------------------------------------------------------------------------------------------------------------------------------------------------------------------------------------------------------------------------------------|
| Journal:                        | <i>BMJ Open</i>                                                                                                                                                                                                                                                                                                                                                                                                                                                                                                                                                                                                                                                                               |
| Manuscript ID                   | bmjopen-2019-032122.R1                                                                                                                                                                                                                                                                                                                                                                                                                                                                                                                                                                                                                                                                        |
| Article Type:                   | Protocol                                                                                                                                                                                                                                                                                                                                                                                                                                                                                                                                                                                                                                                                                      |
| Date Submitted by the Author:   | 05-Aug-2019                                                                                                                                                                                                                                                                                                                                                                                                                                                                                                                                                                                                                                                                                   |
| Complete List of Authors:       | Cochius - den Otter, Suzan; Erasmus University Rotterdam, Pediatric Intensive Care<br>Schaible, Thomas; University Medical Center, Mannheim<br>Greenough, Anne; Kings College London, Department of Women and Children's Health, School of Life Sciences, Faculty of Life Science and Medicine<br>van Heijst, Arno; Radboudumc, Division of Neonatology, Department of Pediatrics<br>Patel, Neil; Royal Hospital for Children Glasgow, Departement of Neonatology<br>Allegaert, Karel; Erasmus MC Sophia, Pediatrics, Division of Neonatology<br>van Rosmalen, Joost; Erasmus MC, Biostatistics<br>Tibboel, Dick; Erasmus MC-Sophia Children's Hospital, Intensive Care and Pediatric Surgery |
| <b>Primary Subject Heading</b>: | Paediatrics                                                                                                                                                                                                                                                                                                                                                                                                                                                                                                                                                                                                                                                                                   |
| Secondary Subject Heading:      | Evidence based practice, Intensive care, Pharmacology and therapeutics                                                                                                                                                                                                                                                                                                                                                                                                                                                                                                                                                                                                                        |
| Keywords:                       | congenital diaphragmatic hernia, sildenafil, nitric oxide, THERAPEUTICS, pulmonary hypertension                                                                                                                                                                                                                                                                                                                                                                                                                                                                                                                                                                                               |
|                                 |                                                                                                                                                                                                                                                                                                                                                                                                                                                                                                                                                                                                                                                                                               |

SCHOLARONE™  
Manuscripts

1  
2  
3 **The CoDiNOS trial protocol: An international randomized controlled trial of intravenous sildenafil**  
4 **versus inhaled nitric oxide for the treatment of pulmonary hypertension in neonates with**  
5 **congenital diaphragmatic hernia.**  
6  
7

8  
9 Suzan CM Cochijs – den Otter MD<sup>1</sup>, Thomas Schaible MD PhD<sup>2</sup>, Anne Greenough MD<sup>3</sup>, Arno van  
10 Heijst MD PhD<sup>4</sup>, Neil Patel MD<sup>5</sup>, Karel Allegaert MD PhD<sup>1,6</sup>, Joost van Rosmalen PhD<sup>7</sup>, Dick Tibboel  
11 MD PhD<sup>1</sup> on behalf of the CDH EURO Consortium  
12  
13

14  
15  
16  
17 <sup>1</sup>Intensive Care and department of Pediatric Surgery, Erasmus MC, Rotterdam, the Netherlands.

18 <sup>2</sup>Department of Neonatology Universitätsmedizin Mannheim, Mannheim, Germany. <sup>3</sup>The Asthma UK  
19 Centre in Allergic Mechanisms of Asthma; Women and Children's Health, School of Life Course  
20 Sciences, Faculty of Life Sciences and Medicine, King's College London, Denmark Hill, London, United  
21 Kingdom. <sup>4</sup> Division of Neonatology, Department of Pediatrics, Radboudumc Amalia Children's  
22 Hospital, Nijmegen, The Netherlands. <sup>5</sup>Departement of Neonatology, Royal Hospital for Children,  
23 Glasgow, United Kingdom. <sup>6</sup>Department of Development and Regeneration, KU-Leuven, Leuven,  
24 Belgium. <sup>7</sup>Department of Biostatistics, Erasmus MC, Rotterdam, The Netherlands.  
25  
26  
27  
28  
29  
30  
31  
32  
33

34 Corresponding author

35  
36 Suzan CM Cochijs – den Otter

37  
38 Erasmus MC-Sophia Children's Hospital

39  
40 Intensive Care Unit

41  
42 Wyttemaweg 80

43  
44 3015 CN Rotterdam

45  
46 Tel.: (+31) 10 7031769

47  
48 Fax: (+31) 10 7037162

49  
50 s.denotter@erasmusmc.nl

51  
52 **Word count:** 3004

53  
54  
55  
56  
57  
58 **Keywords:** Congenital Diaphragmatic Hernia, Pulmonary Hypertension, Therapeutics, Sildenafil,  
59 Nitric Oxide  
60

## Abstract

### Introduction

Congenital diaphragmatic hernia (CDH) is a developmental defect of the diaphragm that impairs normal lung development, causing pulmonary hypertension (PH). PH in CDH newborns is the main determinant for morbidity and mortality. Different therapies are still mainly based on “trial and error”. Inhaled nitric oxide (iNO) is often the drug of first choice. However, iNO does not seem to improve mortality. Intravenous (iv) sildenafil has reduced mortality in newborns with PH without CDH, but prospective data in CDH patients are lacking.

### Methods and analysis

In an open label, multicenter, international randomized controlled trial in Europe, Canada and Australia, 330 newborns with CDH and PH are recruited over a four-year period (2018-2022). Patients are randomized for iv sildenafil or iNO. Sildenafil is given in a loading dose of 0.4 mg/kg in 3 hours; followed by continuous infusion of 1.6 mg/kg/day, iNO is dosed at 20 ppm.

Primary outcome is absence of PH on day 14 without pulmonary vasodilator therapy and/or absence of death within the first 28 days of life. Secondary outcome measures include clinical and echocardiographic markers of PH in the first year of life.

We hypothesize that sildenafil gives a 25% reduction in the primary outcome from 68% to 48% on day 14, for which a sample size of 330 patients is needed. An intention-to-treat analysis will be performed. A p-value (two-sided) < 0.05 is considered significant in all analyses.

### Ethics and dissemination

Ethics approval has been granted by the ethics committee in Rotterdam (MEC-2017-324) and the central Committee on Research Involving Human Subjects (NL60229.078.17) in the Netherlands. The principles of the Declaration of Helsinki, the Medical Research Involving Human Subjects Act, and the national rules and regulations on personal data protection will be used. Parental informed consent will be obtained.

### Registration

Trial registration number NTR6982 (Trial NL6796).

## Article summary

### Strengths and limitations of this study

- The CoDiNOS trial is the first randomized controlled multicenter trial to evaluate the effect of intravenous sildenafil and compare with iNO on pulmonary hypertension in newborns with CDH.
- Treatment allocation is not blinded in the trial. This is not feasible because of variability in iNO equipment and gas mixtures use. Instead, the researchers who analyze the echocardiography to evaluate PH will be blinded to the treatment.
- The primary outcome, PH, will be measured using echocardiography instead of just clinical parameters often used in newborns
- There is no non-intervention group, as it is common practice in the centers of the CDH EURO Consortium to give iNO; hence, it is considered unethical to withhold treatment for one group.
- Long term follow up of 12 months will give more insight in the course of PH in infants

## Introduction:

Congenital diaphragmatic hernia (CDH) is a severe developmental defect of the diaphragm with an incidence of approximately 1 in 3000 live births and a mortality of 27% [1]. Because of this defect, the abdominal organs herniate into the chest causing pulmonary hypoplasia and abnormal pulmonary vasculature growth, resulting in pulmonary hypertension (PH) [2]. In adults and children, PH is defined as mean pulmonary artery pressure (mPAP) exceeding 25 mmHg with a pulmonary capillary wedge pressure of minimal 15 mmHg [3].

The normal pulmonary vascular transition of the neonate takes around two months to achieve these low values of mPAP. During fetal life, there is high resistance in the pulmonary circulation which results in most of the blood flow to bypass the lungs through the ductus arteriosus and oval foramen. Immediately after birth, the pulmonary vascular resistance drops and the blood flow to the lungs significantly increases [4]. In contrast, the pulmonary vascular resistance often does not drop adequately in children with CDH due to a decreased vascular bed associated with lung hypoplasia, and an altered development of the pulmonary vasculature with excessive muscularization of the arterioles, with increased thickness of the arterial media and adventitia. Although the presence of lung hypoplasia can be predicted with prenatal parameters, reliable predictors for PH in CDH patients are lacking [5]. The incidence of PH in CDH patients is 68-79% and causes considerable morbidity and mortality [1, 2, 6]. Therapy in newborns with PH, such as inhaled nitric oxide (iNO) and sildenafil, has improved outcomes in general. However, trials in infants with CDH are sparse.

Inhaled nitric oxide (iNO) diffuses rapidly across the alveolar-capillary membrane into the smooth muscle of pulmonary vessels to activate soluble guanylate cyclase. This enzyme mediates many of the biological effects of iNO, and is responsible for the conversion of GTP to cGMP. The increase of intracellular cGMP relaxes smooth muscles via several mechanisms. iNO also causes bronchodilation and has anti-inflammatory and anti-proliferative effects [7]. In term and near term infants with persistent pulmonary hypertension of the newborn (PPHN), iNO decreases the median duration of mechanical ventilation and reduces the need for extracorporeal membrane oxygenation (ECMO). However, in the two available randomized controlled trials (RCT) with a small number of patients with CDH, mortality did not improve and more ECMO treatment was needed despite short-term improved oxygenation in some treated patients [8, 9]. In the centers of the CDH EURO Consortium, iNO is standard of care in infants with CDH and PH although the positive pharmacodynamic effects in these infants are less convincing than in infants with PPHN [6, 10]. The pathophysiological mechanism of this difference is not understood. In resource poor settings iNO is often unavailable. In

1  
2  
3 the search to find another treatment option, trials to evaluate the effect of sildenafil in newborns  
4 with PPHN have been conducted [11].  
5  
6

7 Sildenafil is a selective phosphodiesterase type 5 (PDE5) inhibitor. PDE5 is an enzyme that specifically  
8 degrades cGMP. Sildenafil inhibits PDE5, increasing cGMP and NO-mediated vasodilatation of the  
9 smooth muscles in arteries. Only five RCTs have been performed in newborns, all non-CDH patients  
10 with PPHN. Four of these studies showed a decrease in oxygenation index (OI) and mortality in a  
11 setting where iNO was not available, while one trial showed no additional benefit of sildenafil when  
12 added to iNO [11]. Although sildenafil is increasingly used in CDH patients, only retrospective data  
13 are available [12]. A decrease in pulmonary vascular resistance index and an increase in cardiac  
14 output were found in a small group of oral sildenafil-treated infants with CDH refractory to iNO [13].  
15 Intravenous sildenafil improved OI and reversed the right-to-left shunt ratio over the PDA, but it also  
16 increased the need for inotropic support [14, 15]. However, its effect on outcome is unknown.  
17  
18

19 We hypothesize that intravenous sildenafil is superior to iNO. iNO is the therapy of first choice in  
20 most centers despite the lack of evidence, and sildenafil is the most promising drug for the treatment  
21 of PH in CDH patients and is increasingly being used [6, 12, 16]. However, no studies have been  
22 performed comparing iNO with intravenous sildenafil in newborns with CDH and PH or PH alone.  
23 Based on the current knowledge, there is equipoise for both treatment modalities.  
24  
25  
26  
27  
28  
29  
30  
31  
32  
33  
34  
35  
36  
37  
38  
39  
40  
41  
42  
43  
44  
45  
46  
47  
48  
49  
50  
51  
52  
53  
54  
55  
56  
57  
58  
59  
60



## Methods and analysis:

### Design

The CoDiNOS trial is a prospective, multicenter, international randomized controlled trial conducted in high volume pediatric surgical centers in Europe, Canada and Australia. The members of the CDH Euro Consortium participating in the trial are listed in the Appendix.

### Objectives

The primary objective of the study is to determine whether the incidence of PH is lower in CDH patients treated with intravenous sildenafil than in patients treated with iNO, with the primary outcome defined as the absence of PH on echocardiography on day 14 without pulmonary vasodilator therapy and without treatment failure and/or death within the first 28 days after birth. PH is defined as systolic pulmonary arterial pressure > 2/3 systolic systemic pressure and/or right ventricular (RV) dilatation/septal displacement and RV dysfunction +/- left ventricular dysfunction.

The secondary outcomes are:

(1) change in OI after 12 and 24 hours of therapy

(2) overall mortality

(3) the incidence of treatment failure which is defined as:

- inability to maintain preductal saturations above 85% ( $\pm 7$  kPa or 52 mmHg) or postductal saturations above 70% ( $\pm 5.3$  kPa or 40 mmHg)
- and/or increase in  $\text{CO}_2 > 70$  mmHg (9.3 kPa) despite optimization of ventilator management
- and/or inadequate oxygen delivery with metabolic acidosis defined as lactate  $\geq 5$  mmol/l and pH  $< 7.15$  and/or hypotension resistant to fluid therapy and adequate inotropic support resulting in a urine output  $< 0.5$  ml/kg/hour
- and/or lactate  $\geq 5$  mmol/l and pH  $< 7.15$
- and/or OI consistently  $\geq 40$

(4) time on intervention drug, defined as intervention drug free days after initiation of the intervention, calculated on day 14

(5) need for ECMO

1  
2  
3 (6) ventilator free days on day 28  
4

5 (7) the use of drugs for PH treatment during the hospital admission  
6  
7

8 (8) the use of pulmonary and/or cardiac medication at discharge and its total duration of  
9 administration  
10

11 (9) short-term and long-term PH on echocardiography at 24 hours, 28 days/discharge and 6 and 12  
12 months  
13  
14

15 (10) the incidence of chronic lung disease  
16  
17

18 (11) the development of neurological abnormalities evaluated with ultrasound of the brain before  
19 the start of the trial, after surgery and before discharge  
20  
21

22 (12) the external validation of the sildenafil PKPD model for the pharmacokinetics and the  
23 pharmacodynamic effects of sildenafil  
24  
25

26 Safety outcomes include adverse events due to the study drugs and the vasoactive-inotropic support  
27 score (VIS).  
28  
29

### 30 31 **Patients** 32

33  
34 Infants diagnosed with CDH who have PH in the first week after birth, are eligible for the trial if born  
35 at or after a gestational age of 34 weeks. The diagnosis of PH is defined as at least two of the  
36 following four criteria: (I) systolic pulmonary arterial pressure > 2/3 systolic systemic pressure  
37 estimated by echocardiography. (II) RV dilatation/septal displacement, RV dysfunction +/- left  
38 ventricular dysfunction. (III) Pre-post ductal SpO<sub>2</sub> difference > 10%. (IV) OI >20. Exclusion criteria are  
39 a severe chromosomal anomaly which may imply a decision to stop or not to start life-saving medical  
40 treatment, severe cardiac anomaly expected to need corrective surgery in the first 60 days of life,  
41 renal anomalies associated with oligohydramnios, severe orthopedic and skeletal deformities, which  
42 are likely to influence thoracic, and / or lung development and severe anomalies of the central  
43 nervous system. Patients who are born in another center and transported with iNO are also excluded  
44 from the trial. Patients who received fetal interventions (trachea balloon placement) are not  
45 excluded.  
46  
47  
48  
49  
50  
51  
52  
53

54  
55 Following antenatal diagnosis, the parents are counselled and informed about the study by the  
56 clinician or research coordinator. Also, they receive a patient information letter and an informed  
57 consent form . If the patient is not born in a participating center or the diagnosis of CDH was not  
58 known, parents are counselled after the diagnosis of CDH and are informed about the study. Also,  
59  
60

1  
2  
3 they receive written information and an informed consent form. This informed consent form  
4 contains consent for the trial and for collection of data and material for future research.  
5

6  
7 For the development of the protocol the SPIRIT reporting guidelines have been used [17]. This  
8 publication is based on protocol version 4, June 13<sup>th</sup> 2018.  
9

## 10 11 **Patient and public involvement** 12

13  
14 Patients and the public were not involved in the development of the trial protocol. However, CDH UK  
15 Sparks, as a parent organization, has assessed and commented on the protocol and as provided  
16 start-up funding as also mentioned in the funding statement. This organization is and will be regularly  
17 informed on progress and results of the trial.  
18  
19

## 20 21 **Study procedures** 22

### 23 24 *Baseline assessment* 25

26 Antenatal ultrasound data about the characteristics of the CDH are collected. These data include the  
27 observed/expected lung-head ratio, position of the liver and stomach and the amniotic fluid index.  
28 An MRI or an ultrasound is performed depending on local experience and possibilities. If an MRI is  
29 performed, the observed/expected fetal lung volume will be calculated. Also data on prenatal  
30 interventions are collected. In all mothers, a planned vaginal or caesarean delivery is pursued.  
31  
32  
33  
34

### 35 36 *Randomization, intervention and blinding* 37

38 When the patient meets the inclusion criteria, the physician logs in to the web based program, which  
39 randomizes the patient with a computer-generated randomization list, made by the independent  
40 statistician of the Data Safety and Monitoring Board. Blocked randomization, with variable block sizes  
41 and stratification by center, is used to achieve equal distribution of the two interventions among the  
42 participants.  
43  
44

45  
46 Postnatally, infants are treated according to a standardized protocol for patients with CDH, which is  
47 implemented in all participating centers. This protocol was developed with the available evidence  
48 and consensus between the participating centers and was updated in June 2016 [10, 16]. If the  
49 patient is diagnosed with PH in the first week of life, the patient will be allocated to one of the two  
50 study drugs (figure 1). iNO is provided by a tank connected to a ventilator. Different devices are used  
51 in different centers. Some centers use integrated systems, making it impossible to disconnect the  
52 iNO tank and replace it with another gas to facilitate a blinded intervention. Therefore, the study is  
53 open label. iNO is given with a starting dose of 20 ppm, which is the maximum dose [18, 19].  
54  
55  
56  
57  
58  
59  
60 Sildenafil is given intravenously, using a loading dose of 0.4mg/kg in 3 hours, followed by continuous

infusion of 1.6mg/kg/day [20, 21]. To wean the study drugs a standard protocol is followed (figure 2). The allocated drugs will be restarted as per protocol if criteria for its use are met again before the age of 14 days. To further standardize care, an inotropic support flow chart is included in the study protocol (figure 3). After day 14 treatment of PH will be at the discretion of the local medical team and the study drug can be changed to, for instance, sildenafil orally. The use of bosentan, milrinone and prostin next to the study treatment is allowed. The use of bosentan as add on therapy is allowed and is considered as PH treatment on day 14. The intervention will be prematurely stopped when the patient meets one or more of the defined failure criteria, described in point three of the secondary outcomes. Further treatment will then be at the discretion of the medical team and will be according to the standardized protocol[16]. INO and sildenafil can both be given outside the study protocol. An ECMO-procedure may then be started in centers where ECMO is available. Data of all patients are used in the intention-to-treat analysis.

### Follow up

After day 14, additional clinical data, such as time on ventilator support (days) and the use of drugs for the treatment of PH, are collected to answer the secondary outcome questions. Also, echocardiographic measurements are taken at 6 and 12 months to evaluate the presence of chronic PH (table 1)

Table 1 Procedures and measurements

|                          | Day 0-7 before start therapy | 3 hrs after start sildenafil | 12hrs after start | 8 am after start | 24hrs after start | Day of surgery, pre-operatively | Day after surgery | Day of ECMO, pre-cannulation | 8 am after start ECMO | Day 14 | Day 28 / before discharge | Day 56 | 6 mnth | 12 mnth |
|--------------------------|------------------------------|------------------------------|-------------------|------------------|-------------------|---------------------------------|-------------------|------------------------------|-----------------------|--------|---------------------------|--------|--------|---------|
| Echocardiography         | X                            |                              |                   |                  | X                 |                                 |                   |                              |                       | X      | X                         |        | X      | X       |
| Calculation of OI        | X                            |                              | X                 |                  | X                 |                                 |                   |                              |                       |        |                           |        |        |         |
| Calculation of VIS score | X                            |                              | X                 |                  | X                 |                                 |                   |                              |                       |        |                           |        |        |         |
| Blood sample             | X                            |                              |                   | X                |                   | X                               | X                 | X                            | X                     | X      |                           |        |        |         |
| Tracheal aspirate        | X                            |                              |                   | X                |                   | X                               | X                 | X                            | X                     | X      |                           |        |        |         |
| Urine sample             | X                            |                              |                   | X                |                   | X                               | X                 | X                            | X                     | X      |                           |        |        |         |
| Severity of CLD          |                              |                              |                   |                  |                   |                                 |                   |                              |                       |        | X                         | X      |        |         |
| Ultrasound brain         | X                            |                              |                   |                  |                   |                                 | X                 |                              |                       |        |                           |        |        |         |
| Sildenafil plasma        |                              | X                            |                   | X                |                   | X                               | X                 |                              | X                     |        |                           |        |        |         |

1  
2  
3 level  
4  
5  
6 OI: oxygenation index; VIS score: vasoactive-inotropic support score; CLD: chronic lung disease; ECMO: extracorporeal membrane  
7 oxygenation  
8

### 9 *Data collection*

10  
11 Echocardiography parameters are measured by local physicians, centrally collected and reviewed by  
12 two blinded independent physicians to reduce inter-observer variation. Demographic and neonatal  
13 characteristics as well as data on the clinical course of all patients are entered in a password  
14 protected web-based database in Rotterdam (OpenClinica). Upon request the collected data will be  
15 available. All centers will keep a logbook of the number of non-participants, including the reasons for  
16 not participating. Study documents are securely stored at each study site for 15 years.  
17  
18  
19  
20  
21

### 22 *Laboratory testing*

23  
24 Blood, urine and tracheal samples are collected in most centers during the trial. Blood samples are  
25 collected before the start of the study and at different time points until day 14. Some samples will be  
26 used to externally validate a NONMEM prediction model for sildenafil. The other samples will be  
27 used in future research on biomarkers to predict severity and outcome of PH in CDH patients. The  
28 samples are centrifuged for 6 minutes at 3000 rpm [22]. Thereafter, the plasma is removed and  
29 stored at –20 degrees Celsius or colder. The total amount of blood taken is maximal 2.5 % of the  
30 circulating volume. Blood sampling will only be done if a central or peripheral line is still present  
31 and/or in combination with routine laboratory measurements. This way blood sampling is a minimal  
32 burden for the patient.  
33  
34  
35  
36  
37  
38  
39

40  
41 Tracheal aspirate for proteomic analysis is also collected at different time points during routine  
42 tracheal suctioning in ventilated patients. Protein profiling with proteomics is used to identify specific  
43 groups of proteins that are involved in the pathogenesis of PH. The tracheal aspirates is centrifuged  
44 for 6 minutes at 3000 rpm and stored at –80 degrees Celsius [23].  
45  
46  
47

48  
49 Also, 8-hour urine is collected at different time points. Two samples of 5 ml are taken and stored at  
50 –20 degrees Celsius or colder.  
51

### 52 *Withdrawal of participants*

53  
54  
55 Parents may decide to withdraw from the study at any time without any consequences. The  
56 investigator can decide to withdraw a patient from the study for urgent medical reasons. In some  
57 cases, there may be exclusion criteria, which were not known before randomization. If this is the  
58 case, the patient will be withdrawn from the study after contacting the study coordinator. With  
59  
60

1  
2  
3 consent of the parents data will still be collected, stored and analyzed to perform an intention-to-  
4 treat analysis. These children will be treated according to standard practice [10, 16].  
5  
6  
7  
8  
9

### 10 **Sample size calculation**

11  
12 We powered our study using PH at day 14 as primary outcome. Lusk et al. showed that PH, defined  
13 as >2/3 systemic blood pressure measured on echocardiography, in CDH patients on day 14 has a  
14 positive predictive value of 0.8 for death, death or ventilation, and death or ventilator support. PH on  
15 day 14 is observed in 64% of CDH patients [24].  
16  
17  
18  
19

20 Even though the definition is not the same, we assume a similar outcome percentage of 64% for  
21 failing the primary outcome in our trial, the absence of PH on day 14 without pulmonary vasodilator  
22 therapy and/or absence of death within the first 28 days of life, in the iNO group. For a 25% relative  
23 reduction to 48%, a sample size of 300 patients (150 patients per group) is needed to obtain a power  
24 of 80%. This will match a number needed to treat of 6.25. Taking missing data and the effects of  
25 correction for covariates into account, we adjust this sample size to 330 patients. In the collaborating  
26 centers 550 patients will be born in three years. Based on our earlier trial (VICI trial) we expect to  
27 have an inclusion rate of 60%. Therefore, the inclusion of 330 patients should be reached in three  
28 years.  
29  
30  
31  
32  
33  
34  
35

### 36 **Data analysis**

37  
38 The patients will be analyzed according to the group they are randomized to (intention-to-treat  
39 analysis). A p-value (two-sided) < 0.05 is considered significant in all analyses. The primary endpoint  
40 PH will be analyzed using multiple logistic regression with randomization arm, center,  
41 observed/expected head-lung ratio, position of the liver, side of the defect, defect size and  
42 ventilation modality as independent variables [25]. If necessary, multiple imputation using the fully  
43 conditional specification method will be used to account for missing data in the independent  
44 variables. We will perform a sensitivity analyses with adjustment for the use of prostin and milrinone,  
45 to account for the effects of these vasodilators on PH.  
46  
47  
48  
49  
50  
51  
52

53 The following analyses will be performed for the secondary outcomes. The distribution of VIS score in  
54 all study participants will be compared between t=0 and t=12 hours after initiation of drug  
55 administration using a Wilcoxon signed rank test. The distribution of changes in OI and VIS score  
56 from t=0 to t=12 and t=24 hours will be compared between the randomization groups with a Mann-  
57 Whitney test. The overall mortality in the first year of life will be compared between the  
58  
59  
60

1  
2  
3 randomization groups with Kaplan-Meier curves and the log-rank test. The number of treatment  
4 failures, the need for ECMO (in ECMO centers), and the need for medication for PH or chronic lung  
5 disease at discharge, and during the first year of life, will be compared between randomization  
6 groups with chi-square tests. The number of study drug free days at day 14, the number of  
7 ventilation-free days until day 28, the fraction of days with need for medical treatment (excluding the  
8 study drug) for PH during the hospital admission, and the severity of chronic lung disease using the  
9 Bancalari definition, will be compared between randomization groups with Mann-Whitney tests.  
10 Deaths will be counted as the worst outcome in these analyses, in accordance with the intention-to-  
11 treat principle. The presence of PH at 28 days/discharge, 6 and 12 months according to the  
12 echocardiographic parameters will be compared between randomization groups with a chi-square  
13 test.  
14

15  
16 To externally validate the pharmacokinetic model of sildenafil and its active metabolite (built in  
17 NONMEM) Normalized prediction distribution errors (NPDE) and Visual Predictive Check (VPC) will be  
18 used. Furthermore, the model will be used to predict the drug concentrations from the new data  
19 set using simulations, in which we expect that the difference will be less than 20%. To find a  
20 relationship between the concentration of sildenafil, its active metabolite and the clinical effects,  
21 such as OI, VIS score and echocardiography measures, a Mann-Whitney or T test will be used.  
22

### 23 **Safety reporting and trial oversight**

24  
25 All severe adverse events (SAEs) and suspected unexpected serious adverse reactions (SUSARs) are  
26 reported from the enrolment until 12 month follow-up. Persistent or significant disability or  
27 incapacity that was not expected with the given O/E LHR is evaluated as an SAE. An elective hospital  
28 admission is not a SAE. All SAEs and SUSARs are reported to the approving ethics committees in  
29 accordance with their requirements. We will report the SAEs and SUSARs that result in death or are  
30 life threatening within 7 days of first knowledge. All other SAEs and SUSARs will be reported within a  
31 period of maximum 15 days. Once a year throughout the clinical trial, we will submit a safety report  
32 to the approving ethics committees and competent authorities of the countries involved.  
33

34  
35 The trial will be monitored by qualified, independent monitors. The trial is classified as a trial with  
36 moderate risk and a specific monitoring plan is in place.  
37

38  
39 The data safety monitoring board will monitor the incidence of mortality on a continuous basis. If at  
40 some point a large difference in mortality between the two treatment groups is noticed, the data  
41 safety monitoring board may recommend ending the study.  
42

43  
44 Insurance will cover compensation to patients who suffer harm from trial participation.  
45  
46  
47  
48  
49  
50  
51  
52  
53  
54  
55  
56  
57  
58  
59  
60

### **Ethics and dissemination**

Ethics approval has been granted by the local ethics committee in Rotterdam (MEC-2017-324) and by the central Committee on Research Involving Human Subjects (NL60229.078.17) in the Netherlands.

Important amendments will be communicated to all relevant parties. The study will be conducted according to the principles of the Declaration of Helsinki, in accordance with the Medical Research Involving Human Subjects Act, and national rules and regulations on personal data protection.

Parental informed consent will be obtained. The results of this study will be disseminated via peer-reviewed publications and implemented in the international guidelines for the treatment of newborns with CDH.

For peer review only



## Literature

1. Snoek, K.G., et al., *Conventional Mechanical Ventilation Versus High-frequency Oscillatory Ventilation for Congenital Diaphragmatic Hernia: A Randomized Clinical Trial (The VICI-trial)*. *Ann Surg*, 2015.
2. Robinson, P.D. and D.A. Fitzgerald, *Congenital diaphragmatic hernia*. *Paediatr Respir Rev*, 2007. **8**(4): p. 323-34; quiz 334-5.
3. Galie, N., et al., *Guidelines for the diagnosis and treatment of pulmonary hypertension: the Task Force for the Diagnosis and Treatment of Pulmonary Hypertension of the European Society of Cardiology (ESC) and the European Respiratory Society (ERS), endorsed by the International Society of Heart and Lung Transplantation (ISHLT)*. *Eur Heart J*, 2009. **30**(20): p. 2493-537.
4. Vali, P. and S. Lakshminrusimha, *The Fetus Can Teach Us: Oxygen and the Pulmonary Vasculature*. *Children (Basel)*, 2017. **4**(8).
5. Russo, F.M., et al., *Lung size and liver herniation predict need for extracorporeal membrane oxygenation but not pulmonary hypertension in isolated congenital diaphragmatic hernia: systematic review and meta-analysis*. *Ultrasound Obstet Gynecol*, 2017. **49**(6): p. 704-713.
6. Putnam, L.R., et al., *Evaluation of Variability in Inhaled Nitric Oxide Use and Pulmonary Hypertension in Patients With Congenital Diaphragmatic Hernia*. *JAMA Pediatr*, 2016.
7. Ichinose, F., J.D. Roberts, Jr., and W.M. Zapol, *Inhaled nitric oxide: a selective pulmonary vasodilator: current uses and therapeutic potential*. *Circulation*, 2004. **109**(25): p. 3106-11.
8. *Inhaled nitric oxide and hypoxic respiratory failure in infants with congenital diaphragmatic hernia. The Neonatal Inhaled Nitric Oxide Study Group (NINOS)*. *Pediatrics*, 1997. **99**(6): p. 838-45.
9. Clark, R.H., et al., *Low-dose nitric oxide therapy for persistent pulmonary hypertension of the newborn. Clinical Inhaled Nitric Oxide Research Group*. *N Engl J Med*, 2000. **342**(7): p. 469-74.
10. Reiss, I., et al., *Standardized postnatal management of infants with congenital diaphragmatic hernia in Europe: the CDH EURO Consortium consensus*. *Neonatology*, 2010. **98**(4): p. 354-64.
11. Kelly, L.E., A. Ohlsson, and P.S. Shah, *Sildenafil for pulmonary hypertension in neonates*. *Cochrane Database Syst Rev*, 2017. **8**: p. CD005494.
12. Lakshminrusimha, S., et al., *Milrinone in congenital diaphragmatic hernia - a randomized pilot trial: study protocol, review of literature and survey of current practices*. *Matern Health Neonatol Perinatol*, 2017. **3**: p. 27.
13. Noori, S., et al., *Cardiovascular effects of sildenafil in neonates and infants with congenital diaphragmatic hernia and pulmonary hypertension*. *Neonatology*, 2007. **91**(2): p. 92-100.
14. Bialkowski, A., F. Moenkemeyer, and N. Patel, *Intravenous sildenafil in the management of pulmonary hypertension associated with congenital diaphragmatic hernia*. *Eur J Pediatr Surg*, 2015. **25**(2): p. 171-6.
15. Kipfmüller, F., et al., *Continuous intravenous sildenafil as an early treatment in neonates with congenital diaphragmatic hernia*. *Pediatr Pulmonol*, 2018.
16. Snoek, K.G., et al., *Standardized Postnatal Management of Infants with Congenital Diaphragmatic Hernia in Europe: The CDH EURO Consortium Consensus - 2015 Update*. *Neonatology*, 2016. **110**(1): p. 66-74.
17. Chan, A.W., et al., *SPIRIT 2013 statement: defining standard protocol items for clinical trials*. *Ann Intern Med*, 2013. **158**(3): p. 200-7.
18. Tworetzky, W., et al., *Inhaled nitric oxide in neonates with persistent pulmonary hypertension*. *Lancet*, 2001. **357**(9250): p. 118-20.
19. Barrington, K.J., et al., *Nitric oxide for respiratory failure in infants born at or near term*. *Cochrane Database Syst Rev*, 2017. **1**: p. CD000399.

20. Steinhorn, R.H., et al., *Intravenous sildenafil in the treatment of neonates with persistent pulmonary hypertension*. *J Pediatr*, 2009. **155**(6): p. 841-847 e1.
21. Mukherjee, A., et al., *Population pharmacokinetics of sildenafil in term neonates: evidence of rapid maturation of metabolic clearance in the early postnatal period*. *Clin Pharmacol Ther*, 2009. **85**(1): p. 56-63.
22. Snoek, K.G., et al., *High-Sensitivity Troponin T and N-Terminal Pro-Brain Natriuretic Peptide in Prediction of Outcome in Congenital Diaphragmatic Hernia: Results from a Multicenter, Randomized Controlled Trial*. *J Pediatr*, 2016. **173**: p. 245-249 e4.
23. Bowler, R.P., M.C. Ellison, and N. Reisdorph, *Proteomics in pulmonary medicine*. *Chest*, 2006. **130**(2): p. 567-74.
24. Lusk, L.A., et al., *Persistence of pulmonary hypertension by echocardiography predicts short-term outcomes in congenital diaphragmatic hernia*. *J Pediatr*, 2015. **166**(2): p. 251-6 e1.
25. Lally, K.P., et al., *Standardized reporting for congenital diaphragmatic hernia--an international consensus*. *J Pediatr Surg*, 2013. **48**(12): p. 2408-15.

### Author contributions

All investigators of the Consortium described below, have contributed to the design of the trial protocol and have approved this version for submission. Coordinating investigator S Cochius – den Otter and Prof D Tibboel are responsible for all aspects of the study conduct, practically study oversight, recruitment, training of the participating hospitals, reporting of the SAEs and SUSARs, outcome assessment and data management. Prof D Tibboel, Prof K Allegaert, Dr T Schaible, Dr A van Heijst, Dr A Greenough and Dr N Patel are responsible for study oversight. J van Rosmalen has contributed to statistical methods and will be involved in interpretation of the results. S Cochius- den Otter will lead the dissemination and translation of results with the contribution of all investigators of the CDH EURO Consortium. Also all members will have authority over the data.

### Funding statement

This work was supported by CDH UK Sparks grant number 16EMC01 and by Stichting Sophia Kinderziekenhuis Fonds grant number S17-19.

### Competing interests

None

### Data sharing statement:

Deidentified individual participant data will be made available, in addition to the statistical analysis plan. The data will be made available upon publication to researchers who provide a methodologically sound proposal for use in achieving the goals of the approved proposal. Every center will make data available for sharing after consultation of the PI of that center. Requests can be sent to Dick Tibboel ([d.tibboel@erasmusmc.nl](mailto:d.tibboel@erasmusmc.nl))

### Figure 1 Trial flow chart

1  
2  
3 Flow chart showing the steps of the trial, from birth until 12 months. CDH: congenital diaphragmatic  
4 hernia; SAE: serious adverse event; SUSAR: suspected unexpected serious adverse event  
5  
6  
7

8  
9 **Figure 2** Protocol to wean study drug

10  
11 Flow chart showing the protocol to wean off inhaled nitric oxide or intravenous sildenafil. iNO:  
12 inhaled nitric oxide; ppm: parts per million  
13  
14  
15

16  
17 **Figure 3** Treatment flow chart of systemic hypotension

18  
19 Flow chart that is added to the treatment protocol, showing the treatment plan for systemic  
20 hypotension. VA ECMO: veno-arterial extracorporeal membrane oxygenation  
21  
22  
23  
24  
25  
26  
27  
28  
29  
30  
31  
32  
33  
34  
35  
36  
37  
38  
39  
40  
41  
42  
43  
44  
45  
46  
47  
48  
49  
50  
51  
52  
53  
54  
55  
56  
57  
58  
59  
60

Figure 1 Trial flow chart

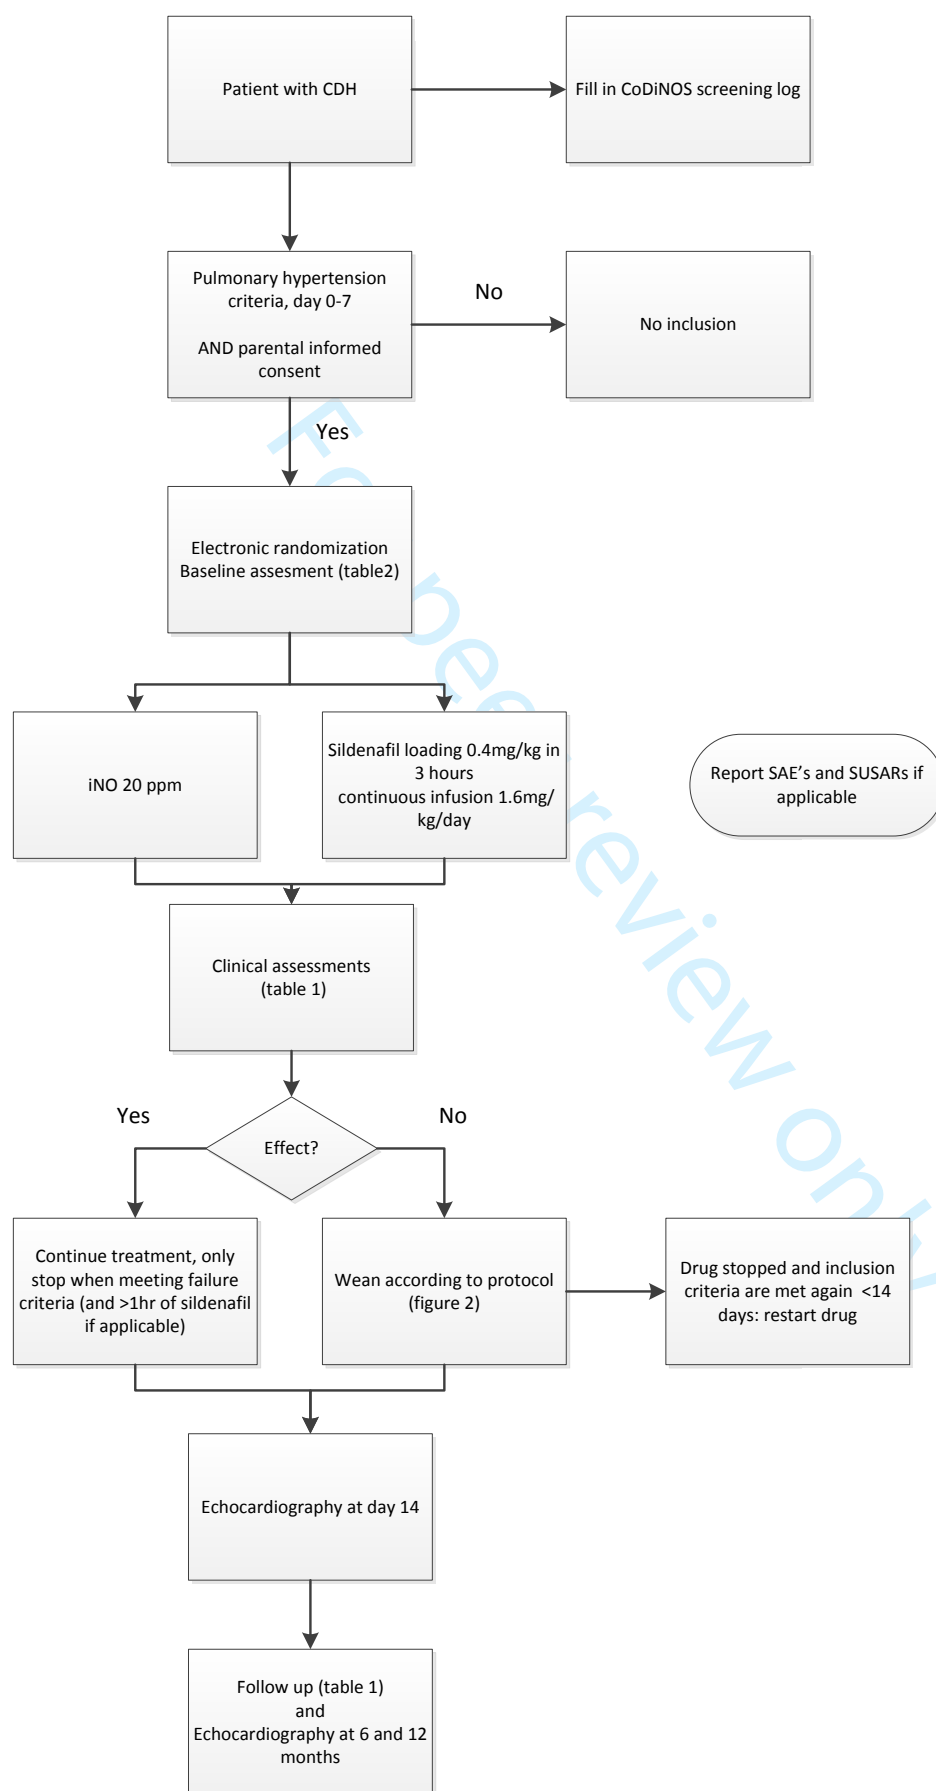

CDH: congenital diaphragmatic hernia; SAE: serious adverse event; SUSAR: suspected unexpected serious adverse event

Figure 2 Protocol to wean study drug

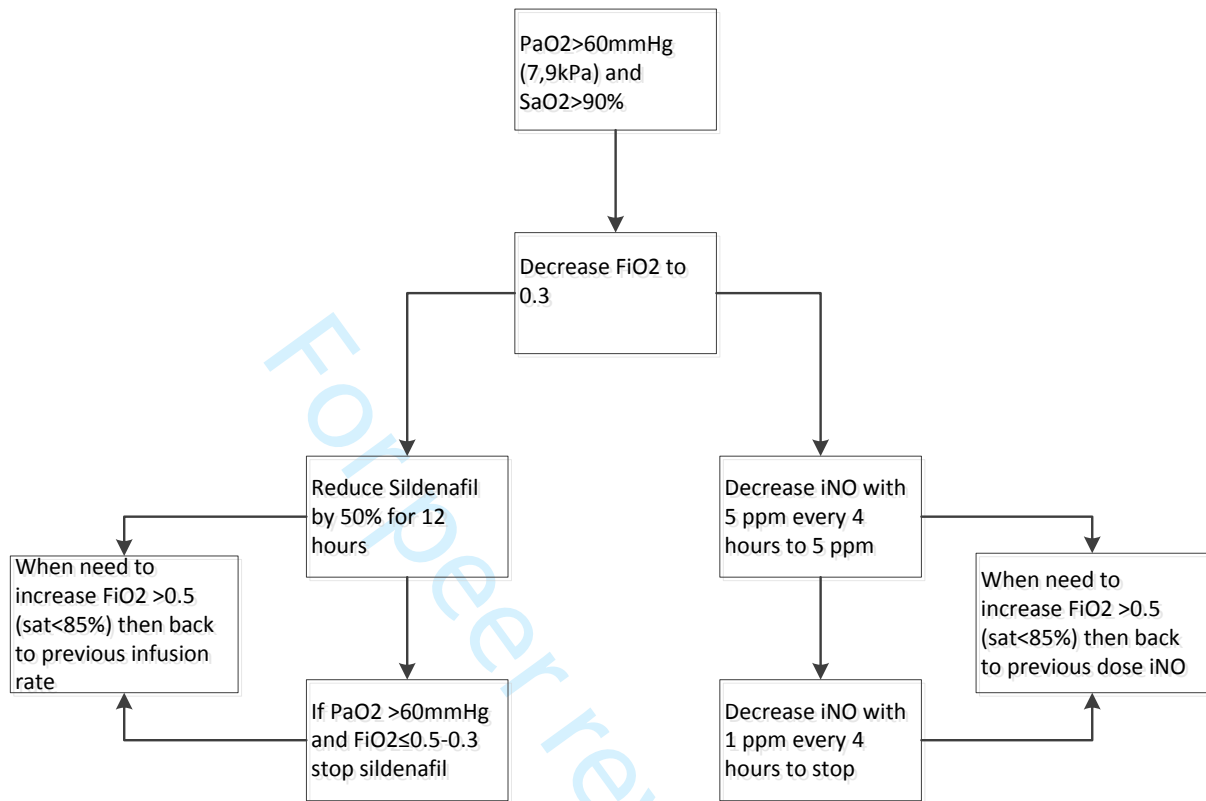

Figure 3: Treatment flow chart of systemic hypotension

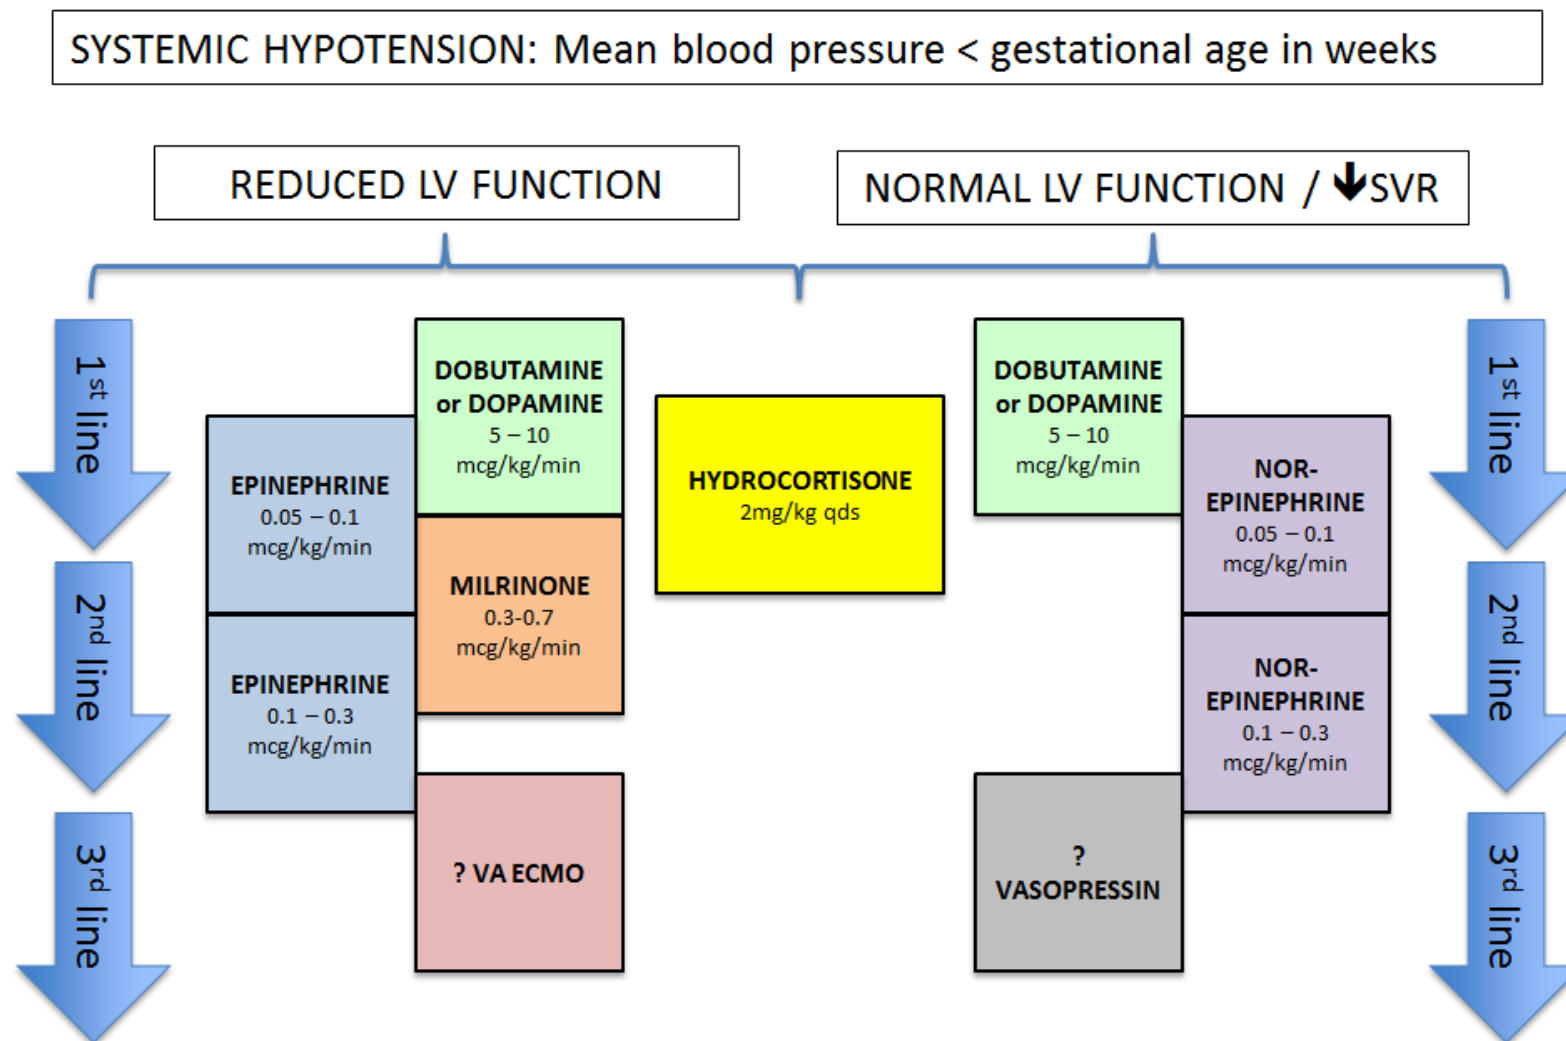

**Appendix:**

## CDH Euro Consortium:

Germany: Florian Kipfmüller, Department of Neonatology and Pediatric Critical Care Medicine, University Children's Hospital, Bonn. Spain: Maria Dolores Elorza, Ana Sanchez, Neonatology Department, Leopoldo Martinez, Pediatric Surgery Department, Carlos Labrandero, Viviana Arreo, Pediatric Cardiology Division, Hospital Universitario La Paz, Madrid. Africa Pertierra Cortada, Jordi Clotet Caba Neonatology Department, Hospital Sant Joan de Déu, Barcelona. Marta Aguar, Ana Gimeno, Raquel Escrig, Division of Neonatology, University and Polytechnic Hospital La Fe Valencia. Italy: Irma Capolupo, Pietro Bagolan, Department of Medical and Surgical Neonatology, Bambino Gesù Children's Hospital, Rome. Fabrizio Ciralli, Genny Raffaeli, Giacomo Cavallaro, Valentina Condò, Fondazione IRCCS Ca' Granda Ospedale Maggiore Policlinico, NICU, University of Milan, Department of Clinical Sciences and Community Health. United Kingdom: United Kingdom - Paul D. Losty Department Of Paediatric Surgery, Division of Child Health, Alder Hey Children's Hospital NHS Foundation Trust, University of Liverpool, Marie Horan, Paediatric Intensive Care Alder Hey Children's Hospital NHS Foundation Trust, University of Liverpool. Nimish V. Subhedar, NICU, Liverpool Women's Hospital, Liverpool. Yogen Singh, Department of Neonatology, Cambridge University Hospitals NHS Foundation trust, Cambridge. Emma E. Williams, The Asthma UK Centre in Allergic Mechanisms of Asthma; Women and Children's Health, School of Life Course Sciences, Faculty of Life Sciences and Medicine, King's College London, Denmark Hill, London. Theodore Dassios, Ravindra Bhat, King's College Hospital NHS Foundation Trust, London. Austria: Jennifer B. Brandt, Alexandra Kreissl, Angelika Berger, Department of Pediatrics and Adolescent Medicine, Division of Neonatology, Pediatric Intensive Care Medicine and Neuropediatrics, Medical University of Vienna. Berndt Urlesberger, Division of Neonatology, Department of Pediatrics and Adolescent Medicine, Medical University of Graz. Sweden: Carmen Mesas Burgos, Björn Frenckner, Department of Pediatric Surgery, Björn Larrson, Pediatric Intensive Care Unit, Karolinska University Hospital, Stockholm. Portugal: Carla Pinto, Serviço de Cuidados Intensivos Pediátricos, Hospital Pediátrico, Centro Hospitalar e Universitário de Coimbra, Coimbra. Joana Saldaha, Department of Neonatology, Hospital de Santa Maria, Lisbon. Belgium: Anne Debeer, Anne Smits, Neonatology, University Hospitals Leuven, Leuven. Norway: Ragnhild Emblem, Department of Pediatric Surgery, Oslo University Hospital, Oslo. Canada: Richard Keijzer, Department of Surgery, Yassar Elsayed, Department of Neonatology, Pediatrics and Child Health, University of Manitoba and Children's Hospital Research Institute of Manitoba. Australia: David Tingay, Department of Neonatology, Royal Children's Hospital, Melbourne, Australia. The Netherlands: Ulrike Kraemer, Intensive Care and department of Pediatric Surgery, Erasmus MC, Rotterdam.

# Reporting checklist for protocol of a clinical trial.

Based on the SPIRIT guidelines.

## Instructions to authors

Complete this checklist by entering the page numbers from your manuscript where readers will find each of the items listed below.

Your article may not currently address all the items on the checklist. Please modify your text to include the missing information. If you are certain that an item does not apply, please write "n/a" and provide a short explanation.

Upload your completed checklist as an extra file when you submit to a journal.

In your methods section, say that you used the SPIRIT reporting guidelines, and cite them as:

Chan A-W, Tetzlaff JM, Altman DG, Laupacis A, Gøtzsche PC, Krleža-Jerić K, Hróbjartsson A, Mann H, Dickersin K, Berlin J, Doré C, Parulekar W, Summerskill W, Groves T, Schulz K, Sox H, Rockhold FW, Rennie D, Moher D. SPIRIT 2013 Statement: Defining standard protocol items for clinical trials. *Ann Intern Med.* 2013;158(3):200-207

|                                             |                     | Reporting Item                                                                                               | Page Number     |
|---------------------------------------------|---------------------|--------------------------------------------------------------------------------------------------------------|-----------------|
| Title                                       | <a href="#">#1</a>  | Descriptive title identifying the study design, population, interventions, and, if applicable, trial acronym | 1               |
| Trial registration                          | <a href="#">#2a</a> | Trial identifier and registry name. If not yet registered, name of intended registry                         | 2               |
| Trial registration: data set                | <a href="#">#2b</a> | All items from the World Health Organization Trial Registration Data Set                                     | 8               |
| Protocol version                            | <a href="#">#3</a>  | Date and version identifier                                                                                  | 8               |
| Funding                                     | <a href="#">#4</a>  | Sources and types of financial, material, and other support                                                  | 14              |
| Roles and responsibilities: contributorship | <a href="#">#5a</a> | Names, affiliations, and roles of protocol contributors                                                      | 14 and appendix |
| Roles and                                   | <a href="#">#5b</a> | Name and contact information for the trial sponsor                                                           | 1               |



|    |                      |                     |                                                        |                 |
|----|----------------------|---------------------|--------------------------------------------------------|-----------------|
| 1  | responsibilities:    |                     |                                                        |                 |
| 2  | sponsor contact      |                     |                                                        |                 |
| 3  | information          |                     |                                                        |                 |
| 4  |                      |                     |                                                        |                 |
| 5  | Roles and            | <a href="#">#5c</a> | Role of study sponsor and funders, if any, in study    | 14              |
| 6  | responsibilities:    |                     | design; collection, management, analysis, and          |                 |
| 7  | sponsor and funder   |                     | interpretation of data; writing of the report; and the |                 |
| 8  |                      |                     | decision to submit the report for publication,         |                 |
| 9  |                      |                     | including whether they will have ultimate authority    |                 |
| 10 |                      |                     | over any of these activities                           |                 |
| 11 |                      |                     |                                                        |                 |
| 12 |                      |                     |                                                        |                 |
| 13 |                      |                     |                                                        |                 |
| 14 |                      |                     |                                                        |                 |
| 15 | Roles and            | <a href="#">#5d</a> | Composition, roles, and responsibilities of the        | 14              |
| 16 | responsibilities:    |                     | coordinating centre, steering committee, endpoint      |                 |
| 17 | committees           |                     | adjudication committee, data management team,          |                 |
| 18 |                      |                     | and other individuals or groups overseeing the         |                 |
| 19 |                      |                     | trial, if applicable (see Item 21a for data            |                 |
| 20 |                      |                     | monitoring committee)                                  |                 |
| 21 |                      |                     |                                                        |                 |
| 22 |                      |                     |                                                        |                 |
| 23 |                      |                     |                                                        |                 |
| 24 |                      |                     |                                                        |                 |
| 25 | Background and       | <a href="#">#6a</a> | Description of research question and justification     | 4-5             |
| 26 | rationale            |                     | for undertaking the trial, including summary of        |                 |
| 27 |                      |                     | relevant studies (published and unpublished)           |                 |
| 28 |                      |                     | examining benefits and harms for each                  |                 |
| 29 |                      |                     | intervention                                           |                 |
| 30 |                      |                     |                                                        |                 |
| 31 |                      |                     |                                                        |                 |
| 32 |                      |                     |                                                        |                 |
| 33 | Background and       | <a href="#">#6b</a> | Explanation for choice of comparators                  | 4-5             |
| 34 | rationale: choice of |                     |                                                        |                 |
| 35 | comparators          |                     |                                                        |                 |
| 36 |                      |                     |                                                        |                 |
| 37 |                      |                     |                                                        |                 |
| 38 | Objectives           | <a href="#">#7</a>  | Specific objectives or hypotheses                      | 6               |
| 39 |                      |                     |                                                        |                 |
| 40 |                      |                     |                                                        |                 |
| 41 | Trial design         | <a href="#">#8</a>  | Description of trial design including type of trial    | 6               |
| 42 |                      |                     | (eg, parallel group, crossover, factorial, single      |                 |
| 43 |                      |                     | group), allocation ratio, and framework (eg,           |                 |
| 44 |                      |                     | superiority, equivalence, non-inferiority,             |                 |
| 45 |                      |                     | exploratory)                                           |                 |
| 46 |                      |                     |                                                        |                 |
| 47 |                      |                     |                                                        |                 |
| 48 |                      |                     |                                                        |                 |
| 49 | Study setting        | <a href="#">#9</a>  | Description of study settings (eg, community clinic,   | 6, 14, appendix |
| 50 |                      |                     | academic hospital) and list of countries where         |                 |
| 51 |                      |                     | data will be collected. Reference to where list of     |                 |
| 52 |                      |                     | study sites can be obtained                            |                 |
| 53 |                      |                     |                                                        |                 |
| 54 |                      |                     |                                                        |                 |
| 55 |                      |                     |                                                        |                 |
| 56 | Eligibility criteria | <a href="#">#10</a> | Inclusion and exclusion criteria for participants. If  | 7               |
| 57 |                      |                     | applicable, eligibility criteria for study centres and |                 |
| 58 |                      |                     |                                                        |                 |
| 59 |                      |                     |                                                        |                 |
| 60 |                      |                     |                                                        |                 |

|    |                      |                                                                          |         |
|----|----------------------|--------------------------------------------------------------------------|---------|
| 1  |                      | individuals who will perform the interventions (eg,                      |         |
| 2  |                      | surgeons, psychotherapists)                                              |         |
| 3  |                      |                                                                          |         |
| 4  | Interventions:       | <a href="#">#11a</a> Interventions for each group with sufficient detail | 8       |
| 5  | description          | to allow replication, including how and when they                        |         |
| 6  |                      | will be administered                                                     |         |
| 7  |                      |                                                                          |         |
| 8  |                      |                                                                          |         |
| 9  | Interventions:       | <a href="#">#11b</a> Criteria for discontinuing or modifying allocated   | 9       |
| 10 | modifications        | interventions for a given trial participant (eg, drug                    |         |
| 11 |                      | dose change in response to harms, participant                            |         |
| 12 |                      | request, or improving / worsening disease)                               |         |
| 13 |                      |                                                                          |         |
| 14 |                      |                                                                          |         |
| 15 |                      |                                                                          |         |
| 16 | Interventions:       | <a href="#">#11c</a> Strategies to improve adherence to intervention     | n/a     |
| 17 | adherence            | protocols, and any procedures for monitoring                             |         |
| 18 |                      | adherence (eg, drug tablet return; laboratory tests)                     |         |
| 19 |                      |                                                                          |         |
| 20 |                      |                                                                          |         |
| 21 | Interventions:       | <a href="#">#11d</a> Relevant concomitant care and interventions that    | 8       |
| 22 | concomitant care     | are permitted or prohibited during the trial                             |         |
| 23 |                      |                                                                          |         |
| 24 |                      |                                                                          |         |
| 25 | Outcomes             | <a href="#">#12</a> Primary, secondary, and other outcomes,              | 6-7     |
| 26 |                      | including the specific measurement variable (eg,                         |         |
| 27 |                      | systolic blood pressure), analysis metric (eg,                           |         |
| 28 |                      | change from baseline, final value, time to event),                       |         |
| 29 |                      | method of aggregation (eg, median, proportion),                          |         |
| 30 |                      | and time point for each outcome. Explanation of                          |         |
| 31 |                      | the clinical relevance of chosen efficacy and harm                       |         |
| 32 |                      | outcomes is strongly recommended                                         |         |
| 33 |                      |                                                                          |         |
| 34 |                      |                                                                          |         |
| 35 |                      |                                                                          |         |
| 36 |                      |                                                                          |         |
| 37 |                      |                                                                          |         |
| 38 | Participant timeline | <a href="#">#13</a> Time schedule of enrolment, interventions            | Table 1 |
| 39 |                      | (including any run-ins and washouts),                                    |         |
| 40 |                      | assessments, and visits for participants. A                              |         |
| 41 |                      | schematic diagram is highly recommended (see                             |         |
| 42 |                      | Figure)                                                                  |         |
| 43 |                      |                                                                          |         |
| 44 |                      |                                                                          |         |
| 45 |                      |                                                                          |         |
| 46 | Sample size          | <a href="#">#14</a> Estimated number of participants needed to           | 11      |
| 47 |                      | achieve study objectives and how it was                                  |         |
| 48 |                      | determined, including clinical and statistical                           |         |
| 49 |                      | assumptions supporting any sample size                                   |         |
| 50 |                      | calculations                                                             |         |
| 51 |                      |                                                                          |         |
| 52 |                      |                                                                          |         |
| 53 |                      |                                                                          |         |
| 54 | Recruitment          | <a href="#">#15</a> Strategies for achieving adequate participant        | 11      |
| 55 |                      | enrolment to reach target sample size                                    |         |
| 56 |                      |                                                                          |         |
| 57 |                      |                                                                          |         |
| 58 | Allocation:          | <a href="#">#16a</a> Method of generating the allocation sequence (eg,   | 8       |
| 59 |                      |                                                                          |         |

|    |                      |                      |                                                        |      |
|----|----------------------|----------------------|--------------------------------------------------------|------|
| 1  | sequence             |                      | computer-generated random numbers), and list of        |      |
| 2  | generation           |                      | any factors for stratification. To reduce              |      |
| 3  |                      |                      | predictability of a random sequence, details of any    |      |
| 4  |                      |                      | planned restriction (eg, blocking) should be           |      |
| 5  |                      |                      | provided in a separate document that is                |      |
| 6  |                      |                      | unavailable to those who enrol participants or         |      |
| 7  |                      |                      | assign interventions                                   |      |
| 8  |                      |                      |                                                        |      |
| 9  |                      |                      |                                                        |      |
| 10 |                      |                      |                                                        |      |
| 11 | Allocation           | <a href="#">#16b</a> | Mechanism of implementing the allocation               | 8    |
| 12 | concealment          |                      | sequence (eg, central telephone; sequentially          |      |
| 13 | mechanism            |                      | numbered, opaque, sealed envelopes), describing        |      |
| 14 |                      |                      | any steps to conceal the sequence until                |      |
| 15 |                      |                      | interventions are assigned                             |      |
| 16 |                      |                      |                                                        |      |
| 17 |                      |                      |                                                        |      |
| 18 |                      |                      |                                                        |      |
| 19 | Allocation:          | <a href="#">#16c</a> | Who will generate the allocation sequence, who         | 8    |
| 20 | implementation       |                      | will enrol participants, and who will assign           |      |
| 21 |                      |                      | participants to interventions                          |      |
| 22 |                      |                      |                                                        |      |
| 23 |                      |                      |                                                        |      |
| 24 |                      |                      |                                                        |      |
| 25 | Blinding (masking)   | <a href="#">#17a</a> | Who will be blinded after assignment to                | 10   |
| 26 |                      |                      | interventions (eg, trial participants, care providers, |      |
| 27 |                      |                      | outcome assessors, data analysts), and how             |      |
| 28 |                      |                      |                                                        |      |
| 29 |                      |                      |                                                        |      |
| 30 | Blinding (masking):  | <a href="#">#17b</a> | If blinded, circumstances under which unblinding       | n/a  |
| 31 | emergency            |                      | is permissible, and procedure for revealing a          |      |
| 32 | unblinding           |                      | participant's allocated intervention during the trial  |      |
| 33 |                      |                      |                                                        |      |
| 34 |                      |                      |                                                        |      |
| 35 |                      |                      |                                                        |      |
| 36 | Data collection plan | <a href="#">#18a</a> | Plans for assessment and collection of outcome,        | 9-10 |
| 37 |                      |                      | baseline, and other trial data, including any related  |      |
| 38 |                      |                      | processes to promote data quality (eg, duplicate       |      |
| 39 |                      |                      | measurements, training of assessors) and a             |      |
| 40 |                      |                      | description of study instruments (eg,                  |      |
| 41 |                      |                      | questionnaires, laboratory tests) along with their     |      |
| 42 |                      |                      | reliability and validity, if known. Reference to       |      |
| 43 |                      |                      | where data collection forms can be found, if not in    |      |
| 44 |                      |                      | the protocol                                           |      |
| 45 |                      |                      |                                                        |      |
| 46 |                      |                      |                                                        |      |
| 47 |                      |                      |                                                        |      |
| 48 |                      |                      |                                                        |      |
| 49 |                      |                      |                                                        |      |
| 50 | Data collection      | <a href="#">#18b</a> | Plans to promote participant retention and             | 10   |
| 51 | plan: retention      |                      | complete follow-up, including list of any outcome      |      |
| 52 |                      |                      | data to be collected for participants who              |      |
| 53 |                      |                      | discontinue or deviate from intervention protocols     |      |
| 54 |                      |                      |                                                        |      |
| 55 |                      |                      |                                                        |      |
| 56 |                      |                      |                                                        |      |
| 57 | Data management      | <a href="#">#19</a>  | Plans for data entry, coding, security, and storage,   | 10   |
| 58 |                      |                      | including any related processes to promote data        |      |
| 59 |                      |                      |                                                        |      |
| 60 |                      |                      |                                                        |      |

|    |                        |                                                                        |                     |
|----|------------------------|------------------------------------------------------------------------|---------------------|
| 1  |                        | quality (eg, double data entry; range checks for                       |                     |
| 2  |                        | data values). Reference to where details of data                       |                     |
| 3  |                        | management procedures can be found, if not in                          |                     |
| 4  |                        | the protocol                                                           |                     |
| 5  |                        |                                                                        |                     |
| 6  |                        |                                                                        |                     |
| 7  | Statistics:            | <a href="#">#20a</a> Statistical methods for analysing primary and     | 11-12               |
| 8  | outcomes               | secondary outcomes. Reference to where other                           |                     |
| 9  |                        | details of the statistical analysis plan can be                        |                     |
| 10 |                        | found, if not in the protocol                                          |                     |
| 11 |                        |                                                                        |                     |
| 12 |                        |                                                                        |                     |
| 13 |                        |                                                                        |                     |
| 14 | Statistics: additional | <a href="#">#20b</a> Methods for any additional analyses (eg, subgroup | 12                  |
| 15 | analyses               | and adjusted analyses)                                                 |                     |
| 16 |                        |                                                                        |                     |
| 17 | Statistics: analysis   | <a href="#">#20c</a> Definition of analysis population relating to     | 11                  |
| 18 | population and         | protocol non-adherence (eg, as randomised                              |                     |
| 19 | missing data           | analysis), and any statistical methods to handle                       |                     |
| 20 |                        | missing data (eg, multiple imputation)                                 |                     |
| 21 |                        |                                                                        |                     |
| 22 |                        |                                                                        |                     |
| 23 |                        |                                                                        |                     |
| 24 | Data monitoring:       | <a href="#">#21a</a> Composition of data monitoring committee (DMC);   | 12                  |
| 25 | formal committee       | summary of its role and reporting structure;                           |                     |
| 26 |                        | statement of whether it is independent from the                        |                     |
| 27 |                        | sponsor and competing interests; and reference to                      |                     |
| 28 |                        | where further details about its charter can be                         |                     |
| 29 |                        | found, if not in the protocol. Alternatively, an                       |                     |
| 30 |                        | explanation of why a DMC is not needed                                 |                     |
| 31 |                        |                                                                        |                     |
| 32 |                        |                                                                        |                     |
| 33 |                        |                                                                        |                     |
| 34 |                        |                                                                        |                     |
| 35 |                        |                                                                        |                     |
| 36 | Data monitoring:       | <a href="#">#21b</a> Description of any interim analyses and stopping  | 12                  |
| 37 | interim analysis       | guidelines, including who will have access to                          |                     |
| 38 |                        | these interim results and make the final decision                      |                     |
| 39 |                        | to terminate the trial                                                 |                     |
| 40 |                        |                                                                        |                     |
| 41 |                        |                                                                        |                     |
| 42 | Harms                  | <a href="#">#22</a> Plans for collecting, assessing, reporting, and    | 12                  |
| 43 |                        | managing solicited and spontaneously reported                          |                     |
| 44 |                        | adverse events and other unintended effects of                         |                     |
| 45 |                        | trial interventions or trial conduct                                   |                     |
| 46 |                        |                                                                        |                     |
| 47 |                        |                                                                        |                     |
| 48 |                        |                                                                        |                     |
| 49 | Auditing               | <a href="#">#23</a> Frequency and procedures for auditing trial        | Audits are          |
| 50 |                        | conduct, if any, and whether the process will be                       | randomly            |
| 51 |                        | independent from investigators and the sponsor                         | performed on trials |
| 52 |                        |                                                                        | in the institute    |
| 53 |                        |                                                                        | (Erasmus MC         |
| 54 |                        |                                                                        | which is the        |
| 55 |                        |                                                                        | sponsor)            |
| 56 |                        |                                                                        |                     |
| 57 |                        |                                                                        |                     |
| 58 |                        |                                                                        |                     |
| 59 |                        |                                                                        |                     |
| 60 |                        |                                                                        |                     |

|    |                       |                      |                                                        |     |
|----|-----------------------|----------------------|--------------------------------------------------------|-----|
| 1  | Research ethics       | <a href="#">#24</a>  | Plans for seeking research ethics committee /          | 12  |
| 2  | approval              |                      | institutional review board (REC / IRB) approval        |     |
| 3  |                       |                      |                                                        |     |
| 4  | Protocol              | <a href="#">#25</a>  | Plans for communicating important protocol             | 12  |
| 5  | amendments            |                      | modifications (eg, changes to eligibility criteria,    |     |
| 6  |                       |                      | outcomes, analyses) to relevant parties (eg,           |     |
| 7  |                       |                      | investigators, REC / IRBs, trial participants, trial   |     |
| 8  |                       |                      | registries, journals, regulators)                      |     |
| 9  |                       |                      |                                                        |     |
| 10 |                       |                      |                                                        |     |
| 11 |                       |                      |                                                        |     |
| 12 |                       |                      |                                                        |     |
| 13 | Consent or assent     | <a href="#">#26a</a> | Who will obtain informed consent or assent from        | 7-8 |
| 14 |                       |                      | potential trial participants or authorised             |     |
| 15 |                       |                      | surrogates, and how (see Item 32)                      |     |
| 16 |                       |                      |                                                        |     |
| 17 |                       |                      |                                                        |     |
| 18 | Consent or assent:    | <a href="#">#26b</a> | Additional consent provisions for collection and       | 8   |
| 19 | ancillary studies     |                      | use of participant data and biological specimens in    |     |
| 20 |                       |                      | ancillary studies, if applicable                       |     |
| 21 |                       |                      |                                                        |     |
| 22 |                       |                      |                                                        |     |
| 23 |                       |                      |                                                        |     |
| 24 | Confidentiality       | <a href="#">#27</a>  | How personal information about potential and           | 10  |
| 25 |                       |                      | enrolled participants will be collected, shared, and   |     |
| 26 |                       |                      | maintained in order to protect confidentiality         |     |
| 27 |                       |                      | before, during, and after the trial                    |     |
| 28 |                       |                      |                                                        |     |
| 29 |                       |                      |                                                        |     |
| 30 | Declaration of        | <a href="#">#28</a>  | Financial and other competing interests for            | 14  |
| 31 | interests             |                      | principal investigators for the overall trial and each |     |
| 32 |                       |                      | study site                                             |     |
| 33 |                       |                      |                                                        |     |
| 34 |                       |                      |                                                        |     |
| 35 |                       |                      |                                                        |     |
| 36 | Data access           | <a href="#">#29</a>  | Statement of who will have access to the final trial   | 14  |
| 37 |                       |                      | dataset, and disclosure of contractual agreements      |     |
| 38 |                       |                      | that limit such access for investigators               |     |
| 39 |                       |                      |                                                        |     |
| 40 |                       |                      |                                                        |     |
| 41 | Ancillary and post    | <a href="#">#30</a>  | Provisions, if any, for ancillary and post-trial care, | 12  |
| 42 | trial care            |                      | and for compensation to those who suffer harm          |     |
| 43 |                       |                      | from trial participation                               |     |
| 44 |                       |                      |                                                        |     |
| 45 |                       |                      |                                                        |     |
| 46 | Dissemination         | <a href="#">#31a</a> | Plans for investigators and sponsor to                 | 12  |
| 47 | policy: trial results |                      | communicate trial results to participants,             |     |
| 48 |                       |                      | healthcare professionals, the public, and other        |     |
| 49 |                       |                      | relevant groups (eg, via publication, reporting in     |     |
| 50 |                       |                      | results databases, or other data sharing               |     |
| 51 |                       |                      | arrangements), including any publication               |     |
| 52 |                       |                      | restrictions                                           |     |
| 53 |                       |                      |                                                        |     |
| 54 |                       |                      |                                                        |     |
| 55 |                       |                      |                                                        |     |
| 56 |                       |                      |                                                        |     |
| 57 |                       |                      |                                                        |     |
| 58 | Dissemination         | <a href="#">#31b</a> | Authorship eligibility guidelines and any intended     | 14  |
| 59 |                       |                      |                                                        |     |
| 60 |                       |                      |                                                        |     |

|    |                      |                      |                                                       |          |
|----|----------------------|----------------------|-------------------------------------------------------|----------|
| 1  | policy: authorship   |                      | use of professional writers                           |          |
| 2  | Dissemination        | <a href="#">#31c</a> | Plans, if any, for granting public access to the full | n/a      |
| 3  | policy: reproducible |                      | protocol, participant-level dataset, and statistical  |          |
| 4  | research             |                      | code                                                  |          |
| 5  |                      |                      |                                                       |          |
| 6  |                      |                      |                                                       |          |
| 7  | Informed consent     | <a href="#">#32</a>  | Model consent form and other related                  | In Dutch |
| 8  | materials            |                      | documentation given to participants and               |          |
| 9  |                      |                      | authorised surrogates                                 |          |
| 10 |                      |                      |                                                       |          |
| 11 |                      |                      |                                                       |          |
| 12 |                      |                      |                                                       |          |
| 13 | Biological           | <a href="#">#33</a>  | Plans for collection, laboratory evaluation, and      | 9        |
| 14 | specimens            |                      | storage of biological specimens for genetic or        |          |
| 15 |                      |                      | molecular analysis in the current trial and for       |          |
| 16 |                      |                      | future use in ancillary studies, if applicable        |          |
| 17 |                      |                      |                                                       |          |
| 18 |                      |                      |                                                       |          |
| 19 |                      |                      |                                                       |          |

20 The SPIRIT checklist is distributed under the terms of the Creative Commons Attribution License CC-  
 21 BY-ND 3.0. This checklist can be completed online using <https://www.goodreports.org/>, a tool made  
 22 by the [EQUATOR Network](#) in collaboration with [Penelope.ai](#)  
 23

# BMJ Open

**The CoDiNOS trial protocol: An international randomized controlled trial of intravenous sildenafil versus inhaled nitric oxide for the treatment of pulmonary hypertension in neonates with congenital diaphragmatic hernia.**

|                                 |                                                                                                                                                                                                                                                                                                                                                                                                                                                                                                                                                                                                                                                                                               |
|---------------------------------|-----------------------------------------------------------------------------------------------------------------------------------------------------------------------------------------------------------------------------------------------------------------------------------------------------------------------------------------------------------------------------------------------------------------------------------------------------------------------------------------------------------------------------------------------------------------------------------------------------------------------------------------------------------------------------------------------|
| Journal:                        | <i>BMJ Open</i>                                                                                                                                                                                                                                                                                                                                                                                                                                                                                                                                                                                                                                                                               |
| Manuscript ID                   | bmjopen-2019-032122.R2                                                                                                                                                                                                                                                                                                                                                                                                                                                                                                                                                                                                                                                                        |
| Article Type:                   | Protocol                                                                                                                                                                                                                                                                                                                                                                                                                                                                                                                                                                                                                                                                                      |
| Date Submitted by the Author:   | 16-Sep-2019                                                                                                                                                                                                                                                                                                                                                                                                                                                                                                                                                                                                                                                                                   |
| Complete List of Authors:       | Cochius - den Otter, Suzan; Erasmus University Rotterdam, Pediatric Intensive Care<br>Schaible, Thomas; University Medical Center, Mannheim<br>Greenough, Anne; Kings College London, Department of Women and Children's Health, School of Life Sciences, Faculty of Life Science and Medicine<br>van Heijst, Arno; Radboudumc, Division of Neonatology, Department of Pediatrics<br>Patel, Neil; Royal Hospital for Children Glasgow, Departement of Neonatology<br>Allegaert, Karel; Erasmus MC Sophia, Pediatrics, Division of Neonatology<br>van Rosmalen, Joost; Erasmus MC, Biostatistics<br>Tibboel, Dick; Erasmus MC-Sophia Children's Hospital, Intensive Care and Pediatric Surgery |
| <b>Primary Subject Heading</b>: | Paediatrics                                                                                                                                                                                                                                                                                                                                                                                                                                                                                                                                                                                                                                                                                   |
| Secondary Subject Heading:      | Evidence based practice, Intensive care, Pharmacology and therapeutics                                                                                                                                                                                                                                                                                                                                                                                                                                                                                                                                                                                                                        |
| Keywords:                       | congenital diaphragmatic hernia, sildenafil, nitric oxide, THERAPEUTICS, pulmonary hypertension                                                                                                                                                                                                                                                                                                                                                                                                                                                                                                                                                                                               |
|                                 |                                                                                                                                                                                                                                                                                                                                                                                                                                                                                                                                                                                                                                                                                               |

SCHOLARONE™  
Manuscripts

1  
2  
3 **The CoDiNOS trial protocol: An international randomized controlled trial of intravenous sildenafil**  
4 **versus inhaled nitric oxide for the treatment of pulmonary hypertension in neonates with**  
5 **congenital diaphragmatic hernia.**  
6  
7

8  
9 Suzan CM Cochijs – den Otter MD<sup>1</sup>, Thomas Schaible MD PhD<sup>2</sup>, Anne Greenough MD<sup>3</sup>, Arno van  
10 Heijst MD PhD<sup>4</sup>, Neil Patel MD<sup>5</sup>, Karel Allegaert MD PhD<sup>1,6</sup>, Joost van Rosmalen PhD<sup>7</sup>, Dick Tibboel  
11 MD PhD<sup>1</sup> on behalf of the CDH EURO Consortium  
12  
13  
14  
15  
16

17 <sup>1</sup>Intensive Care and department of Pediatric Surgery, Erasmus MC, Rotterdam, the Netherlands.

18 <sup>2</sup>Department of Neonatology Universitätsmedizin Mannheim, Mannheim, Germany. <sup>3</sup>The Asthma UK  
19 Centre in Allergic Mechanisms of Asthma; Women and Children's Health, School of Life Course  
20 Sciences, Faculty of Life Sciences and Medicine, King's College London, Denmark Hill, London, United  
21 Kingdom. <sup>4</sup> Division of Neonatology, Department of Pediatrics, Radboudumc Amalia Children's  
22 Hospital, Nijmegen, The Netherlands. <sup>5</sup>Departement of Neonatology, Royal Hospital for Children,  
23 Glasgow, United Kingdom. <sup>6</sup>Department of Development and Regeneration, KU-Leuven, Leuven,  
24 Belgium. <sup>7</sup>Department of Biostatistics, Erasmus MC, Rotterdam, The Netherlands.  
25  
26  
27  
28  
29  
30  
31  
32  
33

34 Corresponding author

35  
36 Suzan CM Cochijs – den Otter

37  
38 Erasmus MC-Sophia Children's Hospital

39  
40 Intensive Care Unit

41  
42 Wyttemaweg 80

43  
44 3015 CN Rotterdam

45  
46 Tel.: (+31) 10 7031769

47  
48 Fax: (+31) 10 7037162

49  
50 s.denotter@erasmusmc.nl

51  
52 **Word count:** 3004

53  
54  
55  
56  
57  
58 **Keywords:** Congenital Diaphragmatic Hernia, Pulmonary Hypertension, Therapeutics, Sildenafil,  
59 Nitric Oxide  
60



## Abstract

### Introduction

Congenital diaphragmatic hernia (CDH) is a developmental defect of the diaphragm that impairs normal lung development, causing pulmonary hypertension (PH). PH in CDH newborns is the main determinant for morbidity and mortality. Different therapies are still mainly based on “trial and error”. Inhaled nitric oxide (iNO) is often the drug of first choice. However, iNO does not seem to improve mortality. Intravenous (iv) sildenafil has reduced mortality in newborns with PH without CDH, but prospective data in CDH patients are lacking.

### Methods and analysis

In an open label, multicenter, international randomized controlled trial in Europe, Canada and Australia, 330 newborns with CDH and PH are recruited over a four-year period (2018-2022). Patients are randomized for iv sildenafil or iNO. Sildenafil is given in a loading dose of 0.4 mg/kg in 3 hours; followed by continuous infusion of 1.6 mg/kg/day, iNO is dosed at 20 ppm.

Primary outcome is absence of PH on day 14 without pulmonary vasodilator therapy and/or absence of death within the first 28 days of life. Secondary outcome measures include clinical and echocardiographic markers of PH in the first year of life.

We hypothesize that sildenafil gives a 25% reduction in the primary outcome from 68% to 48% on day 14, for which a sample size of 330 patients is needed. An intention-to-treat analysis will be performed. A p-value (two-sided) < 0.05 is considered significant in all analyses.

### Ethics and dissemination

Ethics approval has been granted by the ethics committee in Rotterdam (MEC-2017-324) and the central Committee on Research Involving Human Subjects (NL60229.078.17) in the Netherlands. The principles of the Declaration of Helsinki, the Medical Research Involving Human Subjects Act, and the national rules and regulations on personal data protection will be used. Parental informed consent will be obtained.

### Registration

Trial registration number NTR6982 (Trial NL6796).

## Article summary

### Strengths and limitations of this study

- The CoDiNOS trial is the first randomized controlled multicenter trial to evaluate the effect of intravenous sildenafil and compare with iNO on pulmonary hypertension in newborns with CDH.
- Treatment allocation is not blinded in the trial. This is not feasible because of variability in iNO equipment and gas mixtures use. Instead, the researchers who analyze the echocardiography to evaluate PH will be blinded to the treatment.
- The primary outcome, PH, will be measured using echocardiography instead of just clinical parameters often used in newborns.
- There is no non-intervention group, as it is common practice in the centers of the CDH EURO Consortium to give iNO; hence, it is considered unethical to withhold treatment for one group.
- Long term follow up of 12 months will give more insight in the course of PH in infants.

## Introduction:

Congenital diaphragmatic hernia (CDH) is a severe developmental defect of the diaphragm with an incidence of approximately 1 in 3000 live births and a mortality of 27% [1]. Because of this defect, the abdominal organs herniate into the chest causing pulmonary hypoplasia and abnormal pulmonary vasculature growth, resulting in pulmonary hypertension (PH) [2]. In adults and children, PH is defined as mean pulmonary artery pressure (mPAP) exceeding 25 mmHg with a pulmonary capillary wedge pressure of minimal 15 mmHg [3].

The normal pulmonary vascular transition of the neonate takes around two months to achieve these low values of mPAP. During fetal life, there is high resistance in the pulmonary circulation which results in most of the blood flow to bypass the lungs through the ductus arteriosus and oval foramen. Immediately after birth, the pulmonary vascular resistance drops and the blood flow to the lungs significantly increases [4]. In contrast, the pulmonary vascular resistance often does not drop adequately in children with CDH due to a decreased vascular bed associated with lung hypoplasia, and an altered development of the pulmonary vasculature with excessive muscularization of the arterioles, with increased thickness of the arterial media and adventitia. Although the presence of lung hypoplasia can be predicted with prenatal parameters, reliable predictors for PH in CDH patients are lacking [5]. The incidence of PH in CDH patients is 68-79% and causes considerable morbidity and mortality [1, 2, 6]. Therapy in newborns with PH, such as inhaled nitric oxide (iNO) and sildenafil, has improved outcomes in general. However, trials in infants with CDH are sparse.

Inhaled nitric oxide (iNO) diffuses rapidly across the alveolar-capillary membrane into the smooth muscle of pulmonary vessels to activate soluble guanylate cyclase. This enzyme mediates many of the biological effects of iNO, and is responsible for the conversion of GTP to cGMP. The increase of intracellular cGMP relaxes smooth muscles via several mechanisms. iNO also causes bronchodilation and has anti-inflammatory and anti-proliferative effects [7]. In term and near term infants with persistent pulmonary hypertension of the newborn (PPHN), iNO decreases the median duration of mechanical ventilation and reduces the need for extracorporeal membrane oxygenation (ECMO). However, in the two available randomized controlled trials (RCT) with a small number of patients with CDH, mortality did not improve and more ECMO treatment was needed despite short-term improved oxygenation in some treated patients [8, 9]. In the centers of the CDH EURO Consortium, iNO is standard of care in infants with CDH and PH although the positive pharmacodynamic effects in these infants are less convincing than in infants with PPHN [6, 10]. The pathophysiological mechanism of this difference is not understood. In resource poor settings iNO is often unavailable. In

1  
2  
3 the search to find another treatment option, trials to evaluate the effect of sildenafil in newborns  
4 with PPHN have been conducted [11].  
5

6  
7 Sildenafil is a selective phosphodiesterase type 5 (PDE5) inhibitor. PDE5 is an enzyme that specifically  
8 degrades cGMP. Sildenafil inhibits PDE5, increasing cGMP and NO-mediated vasodilatation of the  
9 smooth muscles in arteries. Only five RCTs have been performed in newborns, all non-CDH patients  
10 with PPHN. Four of these studies showed a decrease in oxygenation index (OI) and mortality in a  
11 setting where iNO was not available, while one trial showed no additional benefit of sildenafil when  
12 added to iNO [11]. Although sildenafil is increasingly used in CDH patients, only retrospective data  
13 are available [12]. A decrease in pulmonary vascular resistance index and an increase in cardiac  
14 output were found in a small group of oral sildenafil-treated infants with CDH refractory to iNO [13].  
15 Intravenous sildenafil improved OI and reversed the right-to-left shunt ratio over the PDA, but it also  
16 increased the need for inotropic support [14, 15]. However, its effect on outcome is unknown.  
17  
18

19 We hypothesize that intravenous sildenafil is superior to iNO. iNO is the therapy of first choice in  
20 most centers despite the lack of evidence, and sildenafil is the most promising drug for the treatment  
21 of PH in CDH patients and is increasingly being used [6, 12, 16]. However, no studies have been  
22 performed comparing iNO with intravenous sildenafil in newborns with CDH and PH or PH alone.  
23 Based on the current knowledge, there is equipoise for both treatment modalities.  
24  
25  
26  
27  
28  
29  
30  
31  
32  
33  
34  
35  
36  
37  
38  
39  
40  
41  
42  
43  
44  
45  
46  
47  
48  
49  
50  
51  
52  
53  
54  
55  
56  
57  
58  
59  
60

## Methods and analysis:

### Design

The CoDiNOS trial is a prospective, multicenter, international randomized controlled trial conducted in high volume pediatric surgical centers in Europe, Canada and Australia. The members of the CDH Euro Consortium participating in the trial are listed in the Appendix.

### Objectives

The primary objective of the study is to determine whether the incidence of PH is lower in CDH patients treated with intravenous sildenafil than in patients treated with iNO, with the primary outcome defined as the absence of PH on echocardiography on day 14 without pulmonary vasodilator therapy and without treatment failure and/or death within the first 28 days after birth. PH is defined as systolic pulmonary arterial pressure > 2/3 systolic systemic pressure and/or right ventricular (RV) dilatation/septal displacement and RV dysfunction +/- left ventricular dysfunction.

The secondary outcomes are:

(1) change in OI after 12 and 24 hours of therapy

(2) overall mortality

(3) the incidence of treatment failure which is defined as:

- inability to maintain preductal saturations above 85% ( $\pm 7$  kPa or 52 mmHg) or postductal saturations above 70% ( $\pm 5.3$  kPa or 40 mmHg)
- and/or increase in  $\text{CO}_2 > 70$  mmHg (9.3 kPa) despite optimization of ventilator management
- and/or inadequate oxygen delivery with metabolic acidosis defined as lactate  $\geq 5$  mmol/l and pH  $< 7.15$  and/or hypotension resistant to fluid therapy and adequate inotropic support resulting in a urine output  $< 0.5$  ml/kg/hour
- and/or lactate  $\geq 5$  mmol/l and pH  $< 7.15$
- and/or OI consistently  $\geq 40$

(4) time on intervention drug, defined as intervention drug free days after initiation of the intervention, calculated on day 14

(5) need for ECMO

1  
2  
3 (6) ventilator free days on day 28  
4

5 (7) the use of drugs for PH treatment during the hospital admission  
6  
7

8 (8) the use of pulmonary and/or cardiac medication at discharge and its total duration of  
9 administration  
10

11 (9) short-term and long-term PH on echocardiography at 24 hours, 28 days/discharge and 6 and 12  
12 months  
13  
14

15 (10) the incidence of chronic lung disease  
16  
17

18 (11) the development of neurological abnormalities evaluated with ultrasound of the brain before  
19 the start of the trial, after surgery and before discharge  
20  
21

22 (12) the external validation of the sildenafil PKPD model for the pharmacokinetics and the  
23 pharmacodynamic effects of sildenafil  
24  
25

26 Safety outcomes include adverse events due to the study drugs and the vasoactive-inotropic support  
27 score (VIS).  
28  
29

### 30 31 **Patients** 32

33  
34 Infants diagnosed with CDH who have PH in the first week after birth, are eligible for the trial if born  
35 at or after a gestational age of 34 weeks. The diagnosis of PH is defined as at least two of the  
36 following four criteria: (I) systolic pulmonary arterial pressure > 2/3 systolic systemic pressure  
37 estimated by echocardiography. (II) RV dilatation/septal displacement, RV dysfunction +/- left  
38 ventricular dysfunction. (III) Pre-post ductal SpO<sub>2</sub> difference > 10%. (IV) OI >20. Exclusion criteria are  
39 a severe chromosomal anomaly which may imply a decision to stop or not to start life-saving medical  
40 treatment, severe cardiac anomaly expected to need corrective surgery in the first 60 days of life,  
41 renal anomalies associated with oligohydramnios, severe orthopedic and skeletal deformities, which  
42 are likely to influence thoracic, and / or lung development and severe anomalies of the central  
43 nervous system. Patients who are born in another center and transported with iNO are also excluded  
44 from the trial. Patients who received fetal interventions (trachea balloon placement) are not  
45 excluded.  
46  
47  
48  
49  
50  
51  
52  
53

54  
55 Following antenatal diagnosis, the parents are counselled and informed about the study by the  
56 clinician or research coordinator. Also, they receive a patient information letter and an informed  
57 consent form . If the patient is not born in a participating center or the diagnosis of CDH was not  
58 known, parents are counselled after the diagnosis of CDH and are informed about the study. Also,  
59  
60

1  
2  
3 they receive written information and an informed consent form. This informed consent form  
4 contains consent for the trial and for collection of data and material for future research.  
5  
6

7 For the development of the protocol the SPIRIT reporting guidelines have been used [17]. This  
8 publication is based on protocol version 4, June 13<sup>th</sup> 2018.  
9  
10

## 11 **Patient and public involvement**

12  
13  
14 Patients and the public were not involved in the development of the trial protocol. However, CDH UK  
15 Sparks, as a parent organization, has assessed and commented on the protocol and as provided  
16 start-up funding as also mentioned in the funding statement. This organization is and will be regularly  
17 informed on progress and results of the trial.  
18  
19  
20

## 21 **Study procedures**

### 22 *Baseline assessment*

23  
24  
25 Antenatal ultrasound data about the characteristics of the CDH are collected. These data include the  
26 observed/expected lung-head ratio, position of the liver and stomach and the amniotic fluid index.  
27  
28 An MRI or an ultrasound is performed depending on local experience and possibilities. If an MRI is  
29 performed, the observed/expected fetal lung volume will be calculated. Also data on prenatal  
30 interventions are collected. In all mothers, a planned vaginal or caesarean delivery is pursued.  
31  
32  
33  
34

### 35 *Randomization, intervention and blinding*

36  
37  
38 Participants will be randomized using ALEA, which is an online, central randomization service  
39 (<https://www.aleaclinical.eu>). Allocation concealment will be ensured, as the service will not release  
40 the randomization code until the patient has been recruited into the trial, which takes place after all  
41 baseline characteristics have been added. ALEA randomizes the patient with a computer-generated  
42 randomization list, made by the independent statistician of the Data Safety and Monitoring Board.  
43  
44 Blocked randomization, with variable block sizes and stratification by center, is used to achieve equal  
45 distribution of the two interventions among the participants.  
46  
47  
48

49  
50 Postnatally, infants are treated according to a standardized protocol for patients with CDH, which is  
51 implemented in all participating centers. This protocol was developed with the available evidence  
52 and consensus between the participating centers and was updated in June 2016 [10, 16]. If the  
53 patient is diagnosed with PH in the first week of life, the patient will be allocated to one of the two  
54 study drugs (figure 1). iNO is provided by a tank connected to a ventilator. Different devices are used  
55 in different centers. Some centers use integrated systems, making it impossible to disconnect the  
56 iNO tank and replace it with another gas to facilitate a blinded intervention. Therefore, the study is  
57  
58  
59  
60

open label. iNO is given with a starting dose of 20 ppm, which is the maximum dose [18, 19]. Sildenafil is given intravenously, using a loading dose of 0.4mg/kg in 3 hours, followed by continuous infusion of 1.6mg/kg/day [20, 21]. To wean the study drugs a standard protocol is followed (figure 2). The allocated drugs will be restarted as per protocol if criteria for its use are met again before the age of 14 days. To further standardize care, an inotropic support flow chart is included in the study protocol (figure 3). After day 14 treatment of PH will be at the discretion of the local medical team and the study drug can be changed to, for instance, sildenafil orally. The use of bosentan, milrinone and prostin next to the study treatment is allowed. The use of bosentan as add on therapy is allowed and is considered as PH treatment on day 14. The intervention will be prematurely stopped when the patient meets one or more of the defined failure criteria, described in point three of the secondary outcomes. Further treatment will then be at the discretion of the medical team and will be according to the standardized protocol[16]. INO and sildenafil can both be given outside the study protocol. An ECMO-procedure may then be started in centers where ECMO is available. Data of all patients are used in the intention-to-treat analysis.

### Follow up

After day 14, additional clinical data, such as time on ventilator support (days) and the use of drugs for the treatment of PH, are collected to answer the secondary outcome questions. Also, echocardiographic measurements are taken at 6 and 12 months to evaluate the presence of chronic PH (table 1)

Table 1 Procedures and measurements

|                          | Day 0-7 before start therapy | 3 hrs after start sildenafil | 12hrs after start | 8 am after start | 24hrs after start | Day of surgery, pre-operatively | Day after surgery | Day of ECMO, pre-cannulation | 8 am after start ECMO | Day 14 | Day 28 / before discharge | Day 56 | 6 mnth | 12 mnth |
|--------------------------|------------------------------|------------------------------|-------------------|------------------|-------------------|---------------------------------|-------------------|------------------------------|-----------------------|--------|---------------------------|--------|--------|---------|
| Echocardiography         | X                            |                              |                   |                  | X                 |                                 |                   |                              |                       | X      | X                         |        | X      | X       |
| Calculation of           | X                            |                              | X                 |                  | X                 |                                 |                   |                              |                       |        |                           |        |        |         |
| Calculation of VIS score | X                            |                              | X                 |                  | X                 |                                 |                   |                              |                       |        |                           |        |        |         |
| Blood sample             | X                            |                              |                   | X                |                   | X                               | X                 | X                            | X                     | X      |                           |        |        |         |
| Tracheal aspirate        | X                            |                              |                   | X                |                   | X                               | X                 | X                            | X                     | X      |                           |        |        |         |
| Urine sample             | X                            |                              |                   | X                |                   | X                               | X                 | X                            | X                     | X      |                           |        |        |         |
| Severity of CLD          |                              |                              |                   |                  |                   |                                 |                   |                              |                       |        | X                         | X      |        |         |
| Ultrasound               | X                            |                              |                   |                  |                   |                                 | X                 |                              |                       |        |                           |        |        |         |



1  
2  
3  
4  
5  
6  
7  
8  
9  
10  
11  
12  
13  
14  
15  
16  
17  
18  
19  
20  
21  
22  
23  
24  
25  
26  
27  
28  
29  
30  
31  
32  
33  
34  
35  
36  
37  
38  
39  
40  
41  
42  
43  
44  
45  
46  
47  
48  
49  
50  
51  
52  
53  
54  
55  
56  
57  
58  
59  
60

|                         |  |   |  |   |  |   |   |  |   |  |  |  |  |  |
|-------------------------|--|---|--|---|--|---|---|--|---|--|--|--|--|--|
| brain                   |  |   |  |   |  |   |   |  |   |  |  |  |  |  |
| Sildenafil plasma level |  | X |  | X |  | X | X |  | X |  |  |  |  |  |

OI: oxygenation index; VIS score: vasoactive-inotropic support score; CLD: chronic lung disease; ECMO: extracorporeal membrane oxygenation

*Data collection*

Echocardiography parameters are measured by local physicians, centrally collected and reviewed by two blinded independent physicians to reduce inter-observer variation. Demographic and neonatal characteristics as well as data on the clinical course of all patients are entered in a password protected web-based database in Rotterdam (OpenClinica). Upon request the collected data will be available. All centers will keep a logbook of the number of non-participants, including the reasons for not participating. Study documents are securely stored at each study site for 15 years.

*Laboratory testing*

Blood, urine and tracheal samples are collected in most centers during the trial. Blood samples are collected before the start of the study and at different time points until day 14. Some samples will be used to externally validate a NONMEM prediction model for sildenafil. The other samples will be used in future research on biomarkers to predict severity and outcome of PH in CDH patients. The samples are centrifuged for 6 minutes at 3000 rpm [22]. Thereafter, the plasma is removed and stored at -20 degrees Celsius or colder. The total amount of blood taken is maximal 2.5 % of the circulating volume. Blood sampling will only be done if a central or peripheral line is still present and/or in combination with routine laboratory measurements. This way blood sampling is a minimal burden for the patient.

Tracheal aspirate for proteomic analysis is also collected at different time points during routine tracheal suctioning in ventilated patients. Protein profiling with proteomics is used to identify specific groups of proteins that are involved in the pathogenesis of PH. The tracheal aspirates is centrifuged for 6 minutes at 3000 rpm and stored at -80 degrees Celsius [23].

Also, 8-hour urine is collected at different time points. Two samples of 5 ml are taken and stored at -20 degrees Celsius or colder.

*Withdrawal of participants*

Parents may decide to withdraw from the study at any time without any consequences. The investigator can decide to withdraw a patient from the study for urgent medical reasons. In some

1  
2  
3 cases, there may be exclusion criteria, which were not known before randomization. If this is the  
4 case, the patient will be withdrawn from the study after contacting the study coordinator. With  
5 consent of the parents data will still be collected, stored and analyzed to perform an intention-to-  
6 treat analysis. These children will be treated according to standard practice [10, 16].  
7  
8  
9

### 10 11 12 13 **Sample size calculation**

14  
15 The sample size calculation is based on a power analysis for the primary outcome, using previously  
16 published data on PH. . Lusk et al. showed that PH, defined as  $>2/3$  systemic blood pressure  
17 measured on echocardiography, in CDH patients on day 14 has a positive predictive value of 0.8 for  
18 death, death or ventilation, and death or ventilator support. PH on day 14 is observed in 64% of CDH  
19 patients [24].  
20  
21  
22  
23

24  
25 Even though the definition of the primary outcome is not the same, we assume a similar outcome  
26 percentage of 64% for failing the primary outcome in our trial, the absence of PH on day 14 without  
27 pulmonary vasodilator therapy and/or absence of death within the first 28 days of life, in the iNO  
28 group. Our aim is to promote practice change, therefor we aim for a clinical significant difference For  
29 a 25% relative reduction to 48%, a sample size of 300 patients (150 patients per group) is needed to  
30 obtain a power of 80%. This will match a number needed to treat of 6.25. Taking missing data and  
31 the effects of correction for covariates into account, we adjust this sample size to 330 patients. In the  
32 collaborating centers 550 patients will be born in three years. Based on our earlier trial (VICI trial) we  
33 expect to have an inclusion rate of 60%. Therefore, the inclusion of 330 patients should be reached in  
34 three years.  
35  
36  
37  
38  
39  
40  
41

### 42 **Data analysis**

43  
44 The patients will be analyzed according to the group they are randomized to (intention-to-treat  
45 analysis). A p-value (two-sided)  $< 0.05$  is considered significant in all analyses. The primary endpoint  
46 will be analyzed using multiple logistic regression with randomization arm, center,  
47 observed/expected head-lung ratio, position of the liver, side of the defect, defect size and  
48 ventilation modality as independent variables [25]. If necessary, multiple imputation using the fully  
49 conditional specification method will be used to account for missing data in the independent  
50 variables. We will perform a sensitivity analyses with adjustment for the use of prostin and milrinone,  
51 to account for the effects of these vasodilators on PH.  
52  
53  
54  
55  
56  
57  
58  
59  
60

1  
2  
3 The following analyses will be performed for the secondary outcomes. The distribution of VIS score in  
4 all study participants will be compared between t=0 and t=12 hours after initiation of drug  
5 administration using a Wilcoxon signed rank test. The distribution of changes in OI and VIS score  
6 from t=0 to t=12 and t=24 hours will be compared between the randomization groups with a Mann-  
7 Whitney test. The overall mortality in the first year of life will be compared between the  
8 randomization groups with Kaplan-Meier curves and the log-rank test. The number of treatment  
9 failures, the need for ECMO (in ECMO centers), and the need for medication for PH or chronic lung  
10 disease at discharge, and during the first year of life, will be compared between randomization  
11 groups with chi-square tests. The number of study drug free days at day 14, the number of  
12 ventilation-free days until day 28, the fraction of days with need for medical treatment (excluding the  
13 study drug) for PH during the hospital admission, and the severity of chronic lung disease using the  
14 Bancalari definition, will be compared between randomization groups with Mann-Whitney tests.  
15 Deaths will be counted as the worst outcome in these analyses, in accordance with the intention-to-  
16 treat principle. The presence of PH at 28 days/discharge, 6 and 12 months according to the  
17 echocardiographic parameters will be compared between randomization groups with a chi-square  
18 test.

19  
20 To externally validate the pharmacokinetic model of sildenafil and its active metabolite ( in NONMEM)  
21 Normalized prediction distribution errors (NPDE) and Visual Predictive Check (VPC) will be used.  
22 Furthermore, the model will be used to predict the drug concentrations from the new data set using  
23 simulations, in which we expect that the difference will be less than 20%. To assess whether there is  
24 a relationship between the concentration of sildenafil, its active metabolite and the clinical effects,  
25 such as OI, VIS score and echocardiography measures, a Mann-Whitney or T test will be used.

### 26 **Safety reporting and trial oversight**

27  
28 All severe adverse events (SAEs) and suspected unexpected serious adverse reactions (SUSARs) are  
29 reported from the enrolment until 12 month follow-up. Persistent or significant disability or  
30 incapacity that was not expected with the given O/E LHR is evaluated as an SAE. An elective hospital  
31 admission is not a SAE. All SAEs and SUSARs are reported to the approving ethics committees in  
32 accordance with their requirements. We will report the SAEs and SUSARs that result in death or are  
33 life threatening within 7 days of first knowledge. All other SAEs and SUSARs will be reported within a  
34 period of maximum 15 days. Once a year throughout the clinical trial, we will submit a safety report  
35 to the approving ethics committees and competent authorities of the countries involved.

36  
37 The trial will be monitored by qualified, independent monitors. The trial is classified as a trial with  
38 moderate risk and a specific monitoring plan is in place.

1  
2  
3 The data safety monitoring board will monitor the incidence of mortality on a continuous basis. If at  
4 some point a large difference in mortality, *defined as an absolute risk increase of 25%*, between the  
5 two treatment groups is noticed, the data safety monitoring board may recommend ending the  
6 study.  
7  
8  
9

10 Insurance will cover compensation to patients who suffer harm from trial participation.  
11  
12

### 13 **Ethics and dissemination**

14

15 Ethics approval has been granted by the local ethics committee in Rotterdam (MEC-2017-324) and by  
16 the central Committee on Research Involving Human Subjects (NL60229.078.17) in the Netherlands.  
17 The trial will be submitted to the regulatory bodies and the local IRB's in all participating countries.  
18 Important amendments will be communicated to all relevant parties. The study will be conducted  
19 according to the principles of the Declaration of Helsinki, in accordance with the Medical Research  
20 Involving Human Subjects Act, and national rules and regulations on personal data protection.  
21 Parental informed consent will be obtained. The results of this study will be disseminated via peer-  
22 reviewed publications and implemented in the international guidelines for the treatment of  
23 newborns with CDH.  
24  
25  
26  
27  
28  
29  
30  
31  
32  
33  
34  
35  
36  
37  
38  
39  
40  
41  
42  
43  
44  
45  
46  
47  
48  
49  
50  
51  
52  
53  
54  
55  
56  
57  
58  
59  
60

## Literature

1. Snoek, K.G., et al., *Conventional Mechanical Ventilation Versus High-frequency Oscillatory Ventilation for Congenital Diaphragmatic Hernia: A Randomized Clinical Trial (The VICI-trial)*. *Ann Surg*, 2015.
2. Robinson, P.D. and D.A. Fitzgerald, *Congenital diaphragmatic hernia*. *Paediatr Respir Rev*, 2007. **8**(4): p. 323-34; quiz 334-5.
3. Galie, N., et al., *Guidelines for the diagnosis and treatment of pulmonary hypertension: the Task Force for the Diagnosis and Treatment of Pulmonary Hypertension of the European Society of Cardiology (ESC) and the European Respiratory Society (ERS), endorsed by the International Society of Heart and Lung Transplantation (ISHLT)*. *Eur Heart J*, 2009. **30**(20): p. 2493-537.
4. Vali, P. and S. Lakshminrusimha, *The Fetus Can Teach Us: Oxygen and the Pulmonary Vasculature*. *Children (Basel)*, 2017. **4**(8).
5. Russo, F.M., et al., *Lung size and liver herniation predict need for extracorporeal membrane oxygenation but not pulmonary hypertension in isolated congenital diaphragmatic hernia: systematic review and meta-analysis*. *Ultrasound Obstet Gynecol*, 2017. **49**(6): p. 704-713.
6. Putnam, L.R., et al., *Evaluation of Variability in Inhaled Nitric Oxide Use and Pulmonary Hypertension in Patients With Congenital Diaphragmatic Hernia*. *JAMA Pediatr*, 2016.
7. Ichinose, F., J.D. Roberts, Jr., and W.M. Zapol, *Inhaled nitric oxide: a selective pulmonary vasodilator: current uses and therapeutic potential*. *Circulation*, 2004. **109**(25): p. 3106-11.
8. *Inhaled nitric oxide and hypoxic respiratory failure in infants with congenital diaphragmatic hernia. The Neonatal Inhaled Nitric Oxide Study Group (NINOS)*. *Pediatrics*, 1997. **99**(6): p. 838-45.
9. Clark, R.H., et al., *Low-dose nitric oxide therapy for persistent pulmonary hypertension of the newborn. Clinical Inhaled Nitric Oxide Research Group*. *N Engl J Med*, 2000. **342**(7): p. 469-74.
10. Reiss, I., et al., *Standardized postnatal management of infants with congenital diaphragmatic hernia in Europe: the CDH EURO Consortium consensus*. *Neonatology*, 2010. **98**(4): p. 354-64.
11. Kelly, L.E., A. Ohlsson, and P.S. Shah, *Sildenafil for pulmonary hypertension in neonates*. *Cochrane Database Syst Rev*, 2017. **8**: p. CD005494.
12. Lakshminrusimha, S., et al., *Milrinone in congenital diaphragmatic hernia - a randomized pilot trial: study protocol, review of literature and survey of current practices*. *Matern Health Neonatol Perinatol*, 2017. **3**: p. 27.
13. Noori, S., et al., *Cardiovascular effects of sildenafil in neonates and infants with congenital diaphragmatic hernia and pulmonary hypertension*. *Neonatology*, 2007. **91**(2): p. 92-100.
14. Bialkowski, A., F. Moenkemeyer, and N. Patel, *Intravenous sildenafil in the management of pulmonary hypertension associated with congenital diaphragmatic hernia*. *Eur J Pediatr Surg*, 2015. **25**(2): p. 171-6.
15. Kipfmüller, F., et al., *Continuous intravenous sildenafil as an early treatment in neonates with congenital diaphragmatic hernia*. *Pediatr Pulmonol*, 2018.
16. Snoek, K.G., et al., *Standardized Postnatal Management of Infants with Congenital Diaphragmatic Hernia in Europe: The CDH EURO Consortium Consensus - 2015 Update*. *Neonatology*, 2016. **110**(1): p. 66-74.
17. Chan, A.W., et al., *SPIRIT 2013 statement: defining standard protocol items for clinical trials*. *Ann Intern Med*, 2013. **158**(3): p. 200-7.
18. Tworetzky, W., et al., *Inhaled nitric oxide in neonates with persistent pulmonary hypertension*. *Lancet*, 2001. **357**(9250): p. 118-20.
19. Barrington, K.J., et al., *Nitric oxide for respiratory failure in infants born at or near term*. *Cochrane Database Syst Rev*, 2017. **1**: p. CD000399.

20. Steinhorn, R.H., et al., *Intravenous sildenafil in the treatment of neonates with persistent pulmonary hypertension*. *J Pediatr*, 2009. **155**(6): p. 841-847 e1.
21. Mukherjee, A., et al., *Population pharmacokinetics of sildenafil in term neonates: evidence of rapid maturation of metabolic clearance in the early postnatal period*. *Clin Pharmacol Ther*, 2009. **85**(1): p. 56-63.
22. Snoek, K.G., et al., *High-Sensitivity Troponin T and N-Terminal Pro-Brain Natriuretic Peptide in Prediction of Outcome in Congenital Diaphragmatic Hernia: Results from a Multicenter, Randomized Controlled Trial*. *J Pediatr*, 2016. **173**: p. 245-249 e4.
23. Bowler, R.P., M.C. Ellison, and N. Reisdorph, *Proteomics in pulmonary medicine*. *Chest*, 2006. **130**(2): p. 567-74.
24. Lusk, L.A., et al., *Persistence of pulmonary hypertension by echocardiography predicts short-term outcomes in congenital diaphragmatic hernia*. *J Pediatr*, 2015. **166**(2): p. 251-6 e1.
25. Lally, K.P., et al., *Standardized reporting for congenital diaphragmatic hernia--an international consensus*. *J Pediatr Surg*, 2013. **48**(12): p. 2408-15.

### Author contributions

All investigators of the Consortium described below, have contributed to the design of the trial protocol and have approved this version for submission. Coordinating investigator S Cochius – den Otter and Prof D Tibboel are responsible for all aspects of the study conduct, practically study oversight, recruitment, training of the participating hospitals, reporting of the SAEs and SUSARs, outcome assessment and data management. Prof D Tibboel, Prof K Allegaert, Dr T Schaible, Dr A van Heijst, Dr A Greenough and Dr N Patel are responsible for study oversight. J van Rosmalen has contributed to statistical methods and will be involved in interpretation of the results. S Cochius- den Otter will lead the dissemination and translation of results with the contribution of all investigators of the CDH EURO Consortium. Also all members will have authority over the data.

### Funding statement

This work was supported by CDH UK Sparks grant number 16EMC01 and by Stichting Sophia Kinderziekenhuis Fonds grant number S17-19.

### Competing interests

None

### Data sharing statement:

Deidentified individual participant data will be made available, in addition to the statistical analysis plan. The data will be made available upon publication to researchers who provide a methodologically sound proposal for use in achieving the goals of the approved proposal. Every center will make data available for sharing after consultation of the PI of that center. Requests can be sent to Dick Tibboel ([d.tibboel@erasmusmc.nl](mailto:d.tibboel@erasmusmc.nl))

### Figure 1 Trial flow chart

1  
2  
3 Flow chart showing the steps of the trial, from birth until 12 months. CDH: congenital diaphragmatic  
4 hernia; SAE: serious adverse event; SUSAR: suspected unexpected serious adverse event  
5  
6  
7

8  
9 **Figure 2** Protocol to wean study drug

10  
11 Flow chart showing the protocol to wean off inhaled nitric oxide or intravenous sildenafil. iNO:  
12 inhaled nitric oxide; ppm: parts per million  
13  
14  
15

16  
17 **Figure 3** Treatment flow chart of systemic hypotension

18  
19 Flow chart that is added to the treatment protocol, showing the treatment plan for systemic  
20 hypotension. VA ECMO: veno-arterial extracorporeal membrane oxygenation  
21  
22  
23  
24  
25  
26  
27  
28  
29  
30  
31  
32  
33  
34  
35  
36  
37  
38  
39  
40  
41  
42  
43  
44  
45  
46  
47  
48  
49  
50  
51  
52  
53  
54  
55  
56  
57  
58  
59  
60

Figure 1 Trial flow chart



CDH: congenital diaphragmatic hernia; SAE: serious adverse event; SUSAR: suspected unexpected serious adverse event



Figure 2 Protocol to wean study drug



Figure 3: Treatment flow chart of systemic hypotension

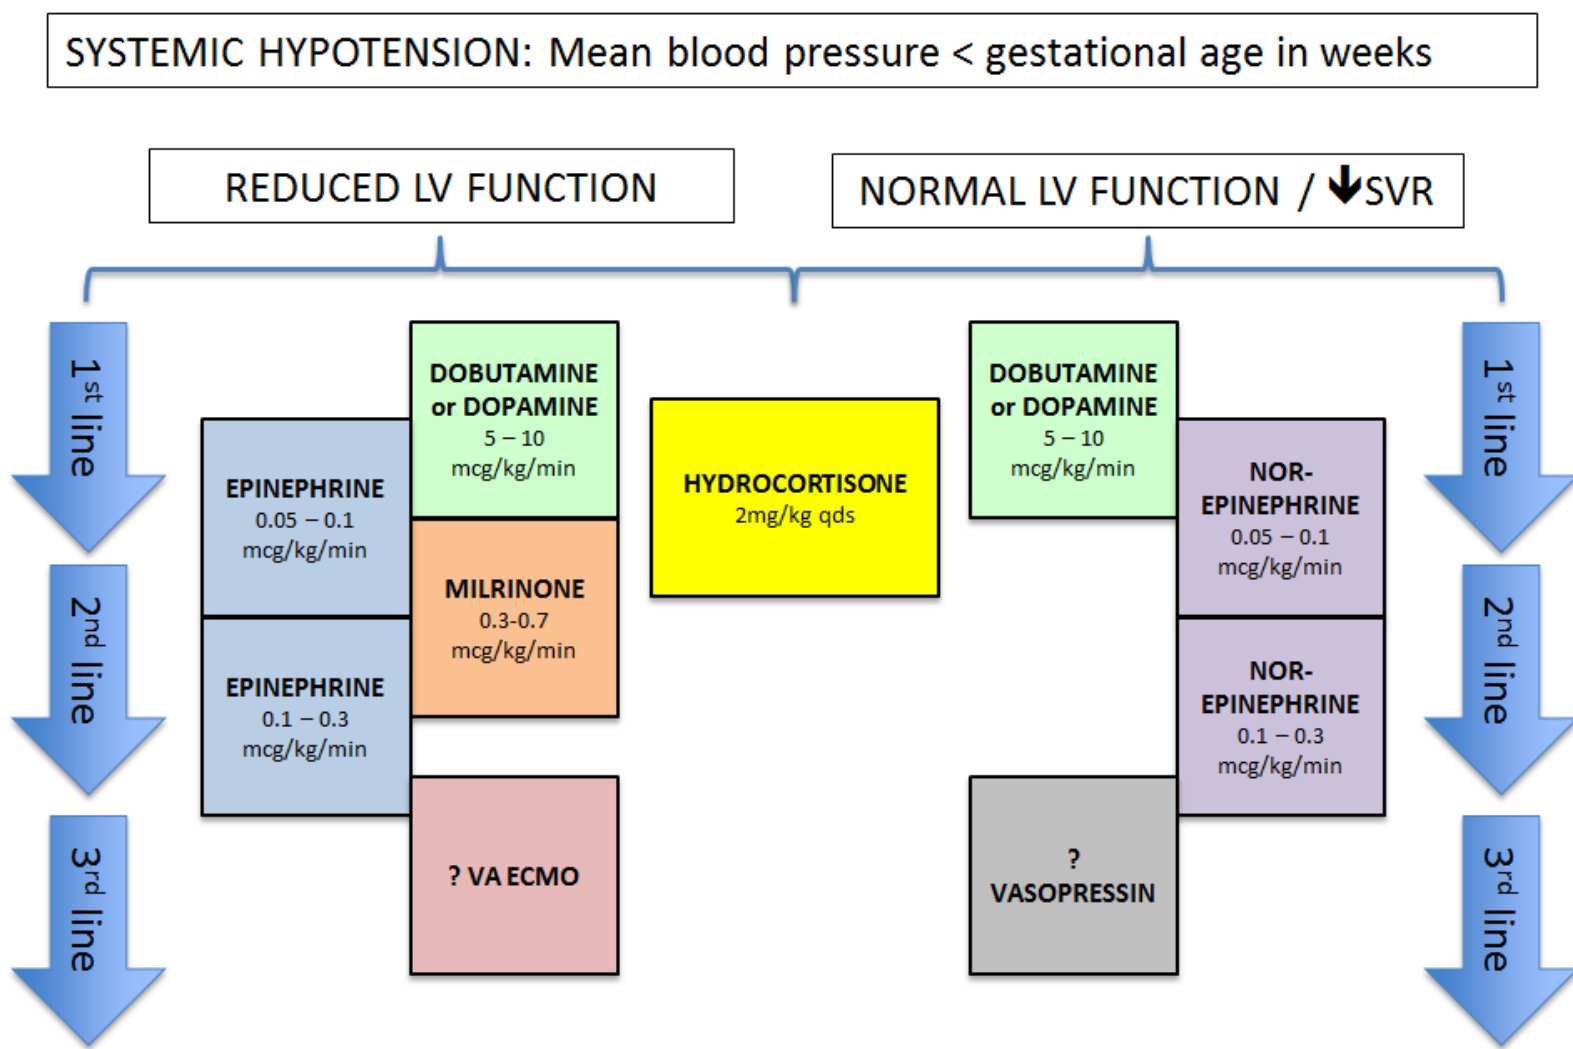

**Appendix:**

## CDH Euro Consortium:

Germany: Florian Kipfmüller, Department of Neonatology and Pediatric Critical Care Medicine, University Children's Hospital, Bonn. Spain: Maria Dolores Elorza, Ana Sanchez, Neonatology Department, Leopoldo Martinez, Pediatric Surgery Department, Carlos Labrandero, Viviana Arreo, Pediatric Cardiology Division, Hospital Universitario La Paz, Madrid. Africa Pertierra Cortada, Jordi Clotet Caba Neonatology Department, Hospital Sant Joan de Déu, Barcelona. Marta Aguar, Ana Gimeno, Raquel Escrig, Division of Neonatology, University and Polytechnic Hospital La Fe Valencia. Italy: Irma Capolupo, Pietro Bagolan, Department of Medical and Surgical Neonatology, Bambino Gesù Children's Hospital, Rome. Fabrizio Ciralli, Genny Raffaeli, Giacomo Cavallaro, Valentina Condò, Fondazione IRCCS Ca' Granda Ospedale Maggiore Policlinico, NICU, University of Milan, Department of Clinical Sciences and Community Health. United Kingdom: United Kingdom - Paul D. Losty Department Of Paediatric Surgery, Division of Child Health, Alder Hey Children's Hospital NHS Foundation Trust, University of Liverpool, Marie Horan, Paediatric Intensive Care Alder Hey Children's Hospital NHS Foundation Trust, University of Liverpool. Nimish V. Subhedar, NICU, Liverpool Women's Hospital, Liverpool. Yogen Singh, Department of Neonatology, Cambridge University Hospitals NHS Foundation trust, Cambridge. Emma E. Williams, The Asthma UK Centre in Allergic Mechanisms of Asthma; Women and Children's Health, School of Life Course Sciences, Faculty of Life Sciences and Medicine, King's College London, Denmark Hill, London. Theodore Dassios, Ravindra Bhat, King's College Hospital NHS Foundation Trust, London. Austria: Jennifer B. Brandt, Alexandra Kreissl, Angelika Berger, Department of Pediatrics and Adolescent Medicine, Division of Neonatology, Pediatric Intensive Care Medicine and Neuropediatrics, Medical University of Vienna. Berndt Urlesberger, Division of Neonatology, Department of Pediatrics and Adolescent Medicine, Medical University of Graz. Sweden: Carmen Mesas Burgos, Björn Frenckner, Department of Pediatric Surgery, Björn Larsson, Pediatric Intensive Care Unit, Karolinska University Hospital, Stockholm. Portugal: Carla Pinto, Serviço de Cuidados Intensivos Pediátricos, Hospital Pediátrico, Centro Hospitalar e Universitário de Coimbra, Coimbra. Joana Saldaha, Department of Neonatology, Hospital de Santa Maria, Lisbon. Belgium: Anne Debeer, Anne Smits, Neonatology, University Hospitals Leuven, Leuven. Norway: Ragnhild Emblem, Department of Pediatric Surgery, Oslo University Hospital, Oslo. Canada: Richard Keijzer, Department of Surgery, Yassar Elsayed, Department of Neonatology, Pediatrics and Child Health, University of Manitoba and Children's Hospital Research Institute of Manitoba. Australia: David Tingay, Department of Neonatology, Royal Children's Hospital, Melbourne, Australia. The Netherlands: Ulrike Kraemer, Intensive Care and department of Pediatric Surgery, Erasmus MC, Rotterdam.

# Reporting checklist for protocol of a clinical trial.

Based on the SPIRIT guidelines.

## Instructions to authors

Complete this checklist by entering the page numbers from your manuscript where readers will find each of the items listed below.

Your article may not currently address all the items on the checklist. Please modify your text to include the missing information. If you are certain that an item does not apply, please write "n/a" and provide a short explanation.

Upload your completed checklist as an extra file when you submit to a journal.

In your methods section, say that you used the SPIRIT reporting guidelines, and cite them as:

Chan A-W, Tetzlaff JM, Altman DG, Laupacis A, Gøtzsche PC, Krleža-Jerić K, Hróbjartsson A, Mann H, Dickersin K, Berlin J, Doré C, Parulekar W, Summerskill W, Groves T, Schulz K, Sox H, Rockhold FW, Rennie D, Moher D. SPIRIT 2013 Statement: Defining standard protocol items for clinical trials. *Ann Intern Med.* 2013;158(3):200-207

|                                             |                     | Reporting Item                                                                                               | Page Number     |
|---------------------------------------------|---------------------|--------------------------------------------------------------------------------------------------------------|-----------------|
| Title                                       | <a href="#">#1</a>  | Descriptive title identifying the study design, population, interventions, and, if applicable, trial acronym | 1               |
| Trial registration                          | <a href="#">#2a</a> | Trial identifier and registry name. If not yet registered, name of intended registry                         | 2               |
| Trial registration: data set                | <a href="#">#2b</a> | All items from the World Health Organization Trial Registration Data Set                                     | 8               |
| Protocol version                            | <a href="#">#3</a>  | Date and version identifier                                                                                  | 8               |
| Funding                                     | <a href="#">#4</a>  | Sources and types of financial, material, and other support                                                  | 14              |
| Roles and responsibilities: contributorship | <a href="#">#5a</a> | Names, affiliations, and roles of protocol contributors                                                      | 14 and appendix |
| Roles and                                   | <a href="#">#5b</a> | Name and contact information for the trial sponsor                                                           | 1               |

|    |                      |                     |                                                        |                 |
|----|----------------------|---------------------|--------------------------------------------------------|-----------------|
| 1  | responsibilities:    |                     |                                                        |                 |
| 2  | sponsor contact      |                     |                                                        |                 |
| 3  | information          |                     |                                                        |                 |
| 4  |                      |                     |                                                        |                 |
| 5  | Roles and            | <a href="#">#5c</a> | Role of study sponsor and funders, if any, in study    | 14              |
| 6  | responsibilities:    |                     | design; collection, management, analysis, and          |                 |
| 7  | sponsor and funder   |                     | interpretation of data; writing of the report; and the |                 |
| 8  |                      |                     | decision to submit the report for publication,         |                 |
| 9  |                      |                     | including whether they will have ultimate authority    |                 |
| 10 |                      |                     | over any of these activities                           |                 |
| 11 |                      |                     |                                                        |                 |
| 12 |                      |                     |                                                        |                 |
| 13 |                      |                     |                                                        |                 |
| 14 |                      |                     |                                                        |                 |
| 15 | Roles and            | <a href="#">#5d</a> | Composition, roles, and responsibilities of the        | 14              |
| 16 | responsibilities:    |                     | coordinating centre, steering committee, endpoint      |                 |
| 17 | committees           |                     | adjudication committee, data management team,          |                 |
| 18 |                      |                     | and other individuals or groups overseeing the         |                 |
| 19 |                      |                     | trial, if applicable (see Item 21a for data            |                 |
| 20 |                      |                     | monitoring committee)                                  |                 |
| 21 |                      |                     |                                                        |                 |
| 22 |                      |                     |                                                        |                 |
| 23 |                      |                     |                                                        |                 |
| 24 |                      |                     |                                                        |                 |
| 25 | Background and       | <a href="#">#6a</a> | Description of research question and justification     | 4-5             |
| 26 | rationale            |                     | for undertaking the trial, including summary of        |                 |
| 27 |                      |                     | relevant studies (published and unpublished)           |                 |
| 28 |                      |                     | examining benefits and harms for each                  |                 |
| 29 |                      |                     | intervention                                           |                 |
| 30 |                      |                     |                                                        |                 |
| 31 |                      |                     |                                                        |                 |
| 32 |                      |                     |                                                        |                 |
| 33 | Background and       | <a href="#">#6b</a> | Explanation for choice of comparators                  | 4-5             |
| 34 | rationale: choice of |                     |                                                        |                 |
| 35 | comparators          |                     |                                                        |                 |
| 36 |                      |                     |                                                        |                 |
| 37 |                      |                     |                                                        |                 |
| 38 | Objectives           | <a href="#">#7</a>  | Specific objectives or hypotheses                      | 6               |
| 39 |                      |                     |                                                        |                 |
| 40 |                      |                     |                                                        |                 |
| 41 | Trial design         | <a href="#">#8</a>  | Description of trial design including type of trial    | 6               |
| 42 |                      |                     | (eg, parallel group, crossover, factorial, single      |                 |
| 43 |                      |                     | group), allocation ratio, and framework (eg,           |                 |
| 44 |                      |                     | superiority, equivalence, non-inferiority,             |                 |
| 45 |                      |                     | exploratory)                                           |                 |
| 46 |                      |                     |                                                        |                 |
| 47 |                      |                     |                                                        |                 |
| 48 |                      |                     |                                                        |                 |
| 49 | Study setting        | <a href="#">#9</a>  | Description of study settings (eg, community clinic,   | 6, 14, appendix |
| 50 |                      |                     | academic hospital) and list of countries where         |                 |
| 51 |                      |                     | data will be collected. Reference to where list of     |                 |
| 52 |                      |                     | study sites can be obtained                            |                 |
| 53 |                      |                     |                                                        |                 |
| 54 |                      |                     |                                                        |                 |
| 55 |                      |                     |                                                        |                 |
| 56 | Eligibility criteria | <a href="#">#10</a> | Inclusion and exclusion criteria for participants. If  | 7               |
| 57 |                      |                     | applicable, eligibility criteria for study centres and |                 |
| 58 |                      |                     |                                                        |                 |
| 59 |                      |                     |                                                        |                 |
| 60 |                      |                     |                                                        |                 |

|    |                      |                                                                          |         |
|----|----------------------|--------------------------------------------------------------------------|---------|
| 1  |                      | individuals who will perform the interventions (eg,                      |         |
| 2  |                      | surgeons, psychotherapists)                                              |         |
| 3  |                      |                                                                          |         |
| 4  | Interventions:       | <a href="#">#11a</a> Interventions for each group with sufficient detail | 8       |
| 5  | description          | to allow replication, including how and when they                        |         |
| 6  |                      | will be administered                                                     |         |
| 7  |                      |                                                                          |         |
| 8  |                      |                                                                          |         |
| 9  | Interventions:       | <a href="#">#11b</a> Criteria for discontinuing or modifying allocated   | 9       |
| 10 | modifications        | interventions for a given trial participant (eg, drug                    |         |
| 11 |                      | dose change in response to harms, participant                            |         |
| 12 |                      | request, or improving / worsening disease)                               |         |
| 13 |                      |                                                                          |         |
| 14 |                      |                                                                          |         |
| 15 |                      |                                                                          |         |
| 16 | Interventions:       | <a href="#">#11c</a> Strategies to improve adherence to intervention     | n/a     |
| 17 | adherence            | protocols, and any procedures for monitoring                             |         |
| 18 |                      | adherence (eg, drug tablet return; laboratory tests)                     |         |
| 19 |                      |                                                                          |         |
| 20 |                      |                                                                          |         |
| 21 | Interventions:       | <a href="#">#11d</a> Relevant concomitant care and interventions that    | 8       |
| 22 | concomitant care     | are permitted or prohibited during the trial                             |         |
| 23 |                      |                                                                          |         |
| 24 |                      |                                                                          |         |
| 25 | Outcomes             | <a href="#">#12</a> Primary, secondary, and other outcomes,              | 6-7     |
| 26 |                      | including the specific measurement variable (eg,                         |         |
| 27 |                      | systolic blood pressure), analysis metric (eg,                           |         |
| 28 |                      | change from baseline, final value, time to event),                       |         |
| 29 |                      | method of aggregation (eg, median, proportion),                          |         |
| 30 |                      | and time point for each outcome. Explanation of                          |         |
| 31 |                      | the clinical relevance of chosen efficacy and harm                       |         |
| 32 |                      | outcomes is strongly recommended                                         |         |
| 33 |                      |                                                                          |         |
| 34 |                      |                                                                          |         |
| 35 |                      |                                                                          |         |
| 36 |                      |                                                                          |         |
| 37 |                      |                                                                          |         |
| 38 | Participant timeline | <a href="#">#13</a> Time schedule of enrolment, interventions            | Table 1 |
| 39 |                      | (including any run-ins and washouts),                                    |         |
| 40 |                      | assessments, and visits for participants. A                              |         |
| 41 |                      | schematic diagram is highly recommended (see                             |         |
| 42 |                      | Figure)                                                                  |         |
| 43 |                      |                                                                          |         |
| 44 |                      |                                                                          |         |
| 45 |                      |                                                                          |         |
| 46 | Sample size          | <a href="#">#14</a> Estimated number of participants needed to           | 11      |
| 47 |                      | achieve study objectives and how it was                                  |         |
| 48 |                      | determined, including clinical and statistical                           |         |
| 49 |                      | assumptions supporting any sample size                                   |         |
| 50 |                      | calculations                                                             |         |
| 51 |                      |                                                                          |         |
| 52 |                      |                                                                          |         |
| 53 |                      |                                                                          |         |
| 54 | Recruitment          | <a href="#">#15</a> Strategies for achieving adequate participant        | 11      |
| 55 |                      | enrolment to reach target sample size                                    |         |
| 56 |                      |                                                                          |         |
| 57 |                      |                                                                          |         |
| 58 | Allocation:          | <a href="#">#16a</a> Method of generating the allocation sequence (eg,   | 8       |
| 59 |                      |                                                                          |         |

|    |                      |                      |                                                        |      |
|----|----------------------|----------------------|--------------------------------------------------------|------|
| 1  | sequence             |                      | computer-generated random numbers), and list of        |      |
| 2  | generation           |                      | any factors for stratification. To reduce              |      |
| 3  |                      |                      | predictability of a random sequence, details of any    |      |
| 4  |                      |                      | planned restriction (eg, blocking) should be           |      |
| 5  |                      |                      | provided in a separate document that is                |      |
| 6  |                      |                      | unavailable to those who enrol participants or         |      |
| 7  |                      |                      | assign interventions                                   |      |
| 8  |                      |                      |                                                        |      |
| 9  |                      |                      |                                                        |      |
| 10 |                      |                      |                                                        |      |
| 11 | Allocation           | <a href="#">#16b</a> | Mechanism of implementing the allocation               | 8    |
| 12 | concealment          |                      | sequence (eg, central telephone; sequentially          |      |
| 13 | mechanism            |                      | numbered, opaque, sealed envelopes), describing        |      |
| 14 |                      |                      | any steps to conceal the sequence until                |      |
| 15 |                      |                      | interventions are assigned                             |      |
| 16 |                      |                      |                                                        |      |
| 17 |                      |                      |                                                        |      |
| 18 |                      |                      |                                                        |      |
| 19 | Allocation:          | <a href="#">#16c</a> | Who will generate the allocation sequence, who         | 8    |
| 20 | implementation       |                      | will enrol participants, and who will assign           |      |
| 21 |                      |                      | participants to interventions                          |      |
| 22 |                      |                      |                                                        |      |
| 23 |                      |                      |                                                        |      |
| 24 |                      |                      |                                                        |      |
| 25 | Blinding (masking)   | <a href="#">#17a</a> | Who will be blinded after assignment to                | 10   |
| 26 |                      |                      | interventions (eg, trial participants, care providers, |      |
| 27 |                      |                      | outcome assessors, data analysts), and how             |      |
| 28 |                      |                      |                                                        |      |
| 29 |                      |                      |                                                        |      |
| 30 | Blinding (masking):  | <a href="#">#17b</a> | If blinded, circumstances under which unblinding       | n/a  |
| 31 | emergency            |                      | is permissible, and procedure for revealing a          |      |
| 32 | unblinding           |                      | participant's allocated intervention during the trial  |      |
| 33 |                      |                      |                                                        |      |
| 34 |                      |                      |                                                        |      |
| 35 |                      |                      |                                                        |      |
| 36 | Data collection plan | <a href="#">#18a</a> | Plans for assessment and collection of outcome,        | 9-10 |
| 37 |                      |                      | baseline, and other trial data, including any related  |      |
| 38 |                      |                      | processes to promote data quality (eg, duplicate       |      |
| 39 |                      |                      | measurements, training of assessors) and a             |      |
| 40 |                      |                      | description of study instruments (eg,                  |      |
| 41 |                      |                      | questionnaires, laboratory tests) along with their     |      |
| 42 |                      |                      | reliability and validity, if known. Reference to       |      |
| 43 |                      |                      | where data collection forms can be found, if not in    |      |
| 44 |                      |                      | the protocol                                           |      |
| 45 |                      |                      |                                                        |      |
| 46 |                      |                      |                                                        |      |
| 47 |                      |                      |                                                        |      |
| 48 |                      |                      |                                                        |      |
| 49 |                      |                      |                                                        |      |
| 50 | Data collection      | <a href="#">#18b</a> | Plans to promote participant retention and             | 10   |
| 51 | plan: retention      |                      | complete follow-up, including list of any outcome      |      |
| 52 |                      |                      | data to be collected for participants who              |      |
| 53 |                      |                      | discontinue or deviate from intervention protocols     |      |
| 54 |                      |                      |                                                        |      |
| 55 |                      |                      |                                                        |      |
| 56 |                      |                      |                                                        |      |
| 57 | Data management      | <a href="#">#19</a>  | Plans for data entry, coding, security, and storage,   | 10   |
| 58 |                      |                      | including any related processes to promote data        |      |
| 59 |                      |                      |                                                        |      |
| 60 |                      |                      |                                                        |      |

|    |                        |                                                                        |                     |
|----|------------------------|------------------------------------------------------------------------|---------------------|
| 1  |                        | quality (eg, double data entry; range checks for                       |                     |
| 2  |                        | data values). Reference to where details of data                       |                     |
| 3  |                        | management procedures can be found, if not in                          |                     |
| 4  |                        | the protocol                                                           |                     |
| 5  |                        |                                                                        |                     |
| 6  |                        |                                                                        |                     |
| 7  | Statistics:            | <a href="#">#20a</a> Statistical methods for analysing primary and     | 11-12               |
| 8  | outcomes               | secondary outcomes. Reference to where other                           |                     |
| 9  |                        | details of the statistical analysis plan can be                        |                     |
| 10 |                        | found, if not in the protocol                                          |                     |
| 11 |                        |                                                                        |                     |
| 12 |                        |                                                                        |                     |
| 13 |                        |                                                                        |                     |
| 14 | Statistics: additional | <a href="#">#20b</a> Methods for any additional analyses (eg, subgroup | 12                  |
| 15 | analyses               | and adjusted analyses)                                                 |                     |
| 16 |                        |                                                                        |                     |
| 17 | Statistics: analysis   | <a href="#">#20c</a> Definition of analysis population relating to     | 11                  |
| 18 | population and         | protocol non-adherence (eg, as randomised                              |                     |
| 19 | missing data           | analysis), and any statistical methods to handle                       |                     |
| 20 |                        | missing data (eg, multiple imputation)                                 |                     |
| 21 |                        |                                                                        |                     |
| 22 |                        |                                                                        |                     |
| 23 |                        |                                                                        |                     |
| 24 | Data monitoring:       | <a href="#">#21a</a> Composition of data monitoring committee (DMC);   | 12                  |
| 25 | formal committee       | summary of its role and reporting structure;                           |                     |
| 26 |                        | statement of whether it is independent from the                        |                     |
| 27 |                        | sponsor and competing interests; and reference to                      |                     |
| 28 |                        | where further details about its charter can be                         |                     |
| 29 |                        | found, if not in the protocol. Alternatively, an                       |                     |
| 30 |                        | explanation of why a DMC is not needed                                 |                     |
| 31 |                        |                                                                        |                     |
| 32 |                        |                                                                        |                     |
| 33 |                        |                                                                        |                     |
| 34 |                        |                                                                        |                     |
| 35 |                        |                                                                        |                     |
| 36 | Data monitoring:       | <a href="#">#21b</a> Description of any interim analyses and stopping  | 12                  |
| 37 | interim analysis       | guidelines, including who will have access to                          |                     |
| 38 |                        | these interim results and make the final decision                      |                     |
| 39 |                        | to terminate the trial                                                 |                     |
| 40 |                        |                                                                        |                     |
| 41 |                        |                                                                        |                     |
| 42 | Harms                  | <a href="#">#22</a> Plans for collecting, assessing, reporting, and    | 12                  |
| 43 |                        | managing solicited and spontaneously reported                          |                     |
| 44 |                        | adverse events and other unintended effects of                         |                     |
| 45 |                        | trial interventions or trial conduct                                   |                     |
| 46 |                        |                                                                        |                     |
| 47 |                        |                                                                        |                     |
| 48 |                        |                                                                        |                     |
| 49 | Auditing               | <a href="#">#23</a> Frequency and procedures for auditing trial        | Audits are          |
| 50 |                        | conduct, if any, and whether the process will be                       | randomly            |
| 51 |                        | independent from investigators and the sponsor                         | performed on trials |
| 52 |                        |                                                                        | in the institute    |
| 53 |                        |                                                                        | (Erasmus MC         |
| 54 |                        |                                                                        | which is the        |
| 55 |                        |                                                                        | sponsor)            |
| 56 |                        |                                                                        |                     |
| 57 |                        |                                                                        |                     |
| 58 |                        |                                                                        |                     |
| 59 |                        |                                                                        |                     |
| 60 |                        |                                                                        |                     |



|    |                       |                      |                                                        |     |
|----|-----------------------|----------------------|--------------------------------------------------------|-----|
| 1  | Research ethics       | <a href="#">#24</a>  | Plans for seeking research ethics committee /          | 12  |
| 2  | approval              |                      | institutional review board (REC / IRB) approval        |     |
| 3  |                       |                      |                                                        |     |
| 4  | Protocol              | <a href="#">#25</a>  | Plans for communicating important protocol             | 12  |
| 5  | amendments            |                      | modifications (eg, changes to eligibility criteria,    |     |
| 6  |                       |                      | outcomes, analyses) to relevant parties (eg,           |     |
| 7  |                       |                      | investigators, REC / IRBs, trial participants, trial   |     |
| 8  |                       |                      | registries, journals, regulators)                      |     |
| 9  |                       |                      |                                                        |     |
| 10 |                       |                      |                                                        |     |
| 11 |                       |                      |                                                        |     |
| 12 |                       |                      |                                                        |     |
| 13 | Consent or assent     | <a href="#">#26a</a> | Who will obtain informed consent or assent from        | 7-8 |
| 14 |                       |                      | potential trial participants or authorised             |     |
| 15 |                       |                      | surrogates, and how (see Item 32)                      |     |
| 16 |                       |                      |                                                        |     |
| 17 |                       |                      |                                                        |     |
| 18 | Consent or assent:    | <a href="#">#26b</a> | Additional consent provisions for collection and       | 8   |
| 19 | ancillary studies     |                      | use of participant data and biological specimens in    |     |
| 20 |                       |                      | ancillary studies, if applicable                       |     |
| 21 |                       |                      |                                                        |     |
| 22 |                       |                      |                                                        |     |
| 23 |                       |                      |                                                        |     |
| 24 | Confidentiality       | <a href="#">#27</a>  | How personal information about potential and           | 10  |
| 25 |                       |                      | enrolled participants will be collected, shared, and   |     |
| 26 |                       |                      | maintained in order to protect confidentiality         |     |
| 27 |                       |                      | before, during, and after the trial                    |     |
| 28 |                       |                      |                                                        |     |
| 29 |                       |                      |                                                        |     |
| 30 | Declaration of        | <a href="#">#28</a>  | Financial and other competing interests for            | 14  |
| 31 | interests             |                      | principal investigators for the overall trial and each |     |
| 32 |                       |                      | study site                                             |     |
| 33 |                       |                      |                                                        |     |
| 34 |                       |                      |                                                        |     |
| 35 |                       |                      |                                                        |     |
| 36 | Data access           | <a href="#">#29</a>  | Statement of who will have access to the final trial   | 14  |
| 37 |                       |                      | dataset, and disclosure of contractual agreements      |     |
| 38 |                       |                      | that limit such access for investigators               |     |
| 39 |                       |                      |                                                        |     |
| 40 |                       |                      |                                                        |     |
| 41 | Ancillary and post    | <a href="#">#30</a>  | Provisions, if any, for ancillary and post-trial care, | 12  |
| 42 | trial care            |                      | and for compensation to those who suffer harm          |     |
| 43 |                       |                      | from trial participation                               |     |
| 44 |                       |                      |                                                        |     |
| 45 |                       |                      |                                                        |     |
| 46 | Dissemination         | <a href="#">#31a</a> | Plans for investigators and sponsor to                 | 12  |
| 47 | policy: trial results |                      | communicate trial results to participants,             |     |
| 48 |                       |                      | healthcare professionals, the public, and other        |     |
| 49 |                       |                      | relevant groups (eg, via publication, reporting in     |     |
| 50 |                       |                      | results databases, or other data sharing               |     |
| 51 |                       |                      | arrangements), including any publication               |     |
| 52 |                       |                      | restrictions                                           |     |
| 53 |                       |                      |                                                        |     |
| 54 |                       |                      |                                                        |     |
| 55 |                       |                      |                                                        |     |
| 56 |                       |                      |                                                        |     |
| 57 |                       |                      |                                                        |     |
| 58 | Dissemination         | <a href="#">#31b</a> | Authorship eligibility guidelines and any intended     | 14  |
| 59 |                       |                      |                                                        |     |
| 60 |                       |                      |                                                        |     |

|    |                      |                      |                                                       |          |
|----|----------------------|----------------------|-------------------------------------------------------|----------|
| 1  | policy: authorship   |                      | use of professional writers                           |          |
| 2  | Dissemination        | <a href="#">#31c</a> | Plans, if any, for granting public access to the full | n/a      |
| 3  | policy: reproducible |                      | protocol, participant-level dataset, and statistical  |          |
| 4  | research             |                      | code                                                  |          |
| 5  |                      |                      |                                                       |          |
| 6  |                      |                      |                                                       |          |
| 7  | Informed consent     | <a href="#">#32</a>  | Model consent form and other related                  | In Dutch |
| 8  | materials            |                      | documentation given to participants and               |          |
| 9  |                      |                      | authorised surrogates                                 |          |
| 10 |                      |                      |                                                       |          |
| 11 |                      |                      |                                                       |          |
| 12 |                      |                      |                                                       |          |
| 13 | Biological           | <a href="#">#33</a>  | Plans for collection, laboratory evaluation, and      | 9        |
| 14 | specimens            |                      | storage of biological specimens for genetic or        |          |
| 15 |                      |                      | molecular analysis in the current trial and for       |          |
| 16 |                      |                      | future use in ancillary studies, if applicable        |          |
| 17 |                      |                      |                                                       |          |
| 18 |                      |                      |                                                       |          |
| 19 |                      |                      |                                                       |          |

20 The SPIRIT checklist is distributed under the terms of the Creative Commons Attribution License CC-  
 21 BY-ND 3.0. This checklist can be completed online using <https://www.goodreports.org/>, a tool made  
 22 by the [EQUATOR Network](#) in collaboration with [Penelope.ai](#)  
 23
